# Supplementary material
Source: publisher figshare collection journal article supplement (https://tandf.figshare.com/articles/dataset/_/24315616)
Supplement: Supplementary file 1 [file 1]

## Sheet: Kingdom
Taxonomy	KKL	PY	CDM	Tax_detail
Bacteria	0.999072	0.993796	0.997885	k__Bacteria;
Archaea	0	0.000223246	0.000129248	k__Archaea;
Others	0.000928232	0.00598064	0.00198571	Others

## Sheet: Phylum
Taxonomy	KKL	PY	CDM	Tax_detail
Proteobacteria	0.961602	0.583153	0.556939	k__Bacteria;p__Proteobacteria;
Bacteroidota	0.00586314	0.254324	0.158234	k__Bacteria;p__Bacteroidota;
Actinobacteriota	0.0051464	0.0467759	0.17949	k__Bacteria;p__Actinobacteriota;
Firmicutes	0.0221131	0.0901208	0.100049	k__Bacteria;p__Firmicutes;
Acidobacteriota	2.34996e-05	0.0050524	2.34996e-05	k__Bacteria;p__Acidobacteriota;
Verrucomicrobiota	0.00117498	0.00324294	0.000986981	k__Bacteria;p__Verrucomicrobiota;
Chloroflexi	0.000317244	0.00108098	0.000352493	k__Bacteria;p__Chloroflexi;
Myxococcota	0	0.000928232	0	k__Bacteria;p__Myxococcota;
Planctomycetota	5.87489e-05	0.000881233	0.000328994	k__Bacteria;p__Planctomycetota;
Gemmatimonadota	3.52493e-05	0.000751986	9.39982e-05	k__Bacteria;p__Gemmatimonadota;
Bdellovibrionota	0.000187996	0.000493491	0.000234996	k__Bacteria;p__Bdellovibrionota;
Deferribacterota	0.000176247	0.000281995	4.69991e-05	k__Bacteria;p__Deferribacterota;
Nitrospirota	3.52493e-05	0.000270245	0	k__Bacteria;p__Nitrospirota;
Desulfobacterota	4.69991e-05	0.000246745	0.000105748	k__Bacteria;p__Desulfobacterota;
Patescibacteria	9.39982e-05	0.000234996	0.000129248	k__Bacteria;p__Patescibacteria;
Fusobacteriota	0.000140997	0	8.22484e-05	k__Bacteria;p__Fusobacteriota;
Cyanobacteria	0	9.39982e-05	0	k__Bacteria;p__Cyanobacteria;
Methylomirabilota	0	7.04987e-05	0	k__Bacteria;p__Methylomirabilota;
Aenigmarchaeota	0	0	7.04987e-05	k__Archaea;p__Aenigmarchaeota;
MBNT15	0	7.04987e-05	0	k__Bacteria;p__MBNT15;
Dependentiae	0	5.87489e-05	3.52493e-05	k__Bacteria;p__Dependentiae;
WPS-2	0	5.87489e-05	0	k__Bacteria;p__WPS-2;
Entotheonellaeota	0	4.69991e-05	0	k__Bacteria;p__Entotheonellaeota;
NB1-j	0	4.69991e-05	0	k__Bacteria;p__NB1-j;
Others	0.00298444	0.0117145	0.00279645	Others

## Sheet: class
Taxonomy	KKL	PY	CDM	Tax_detail
Gammaproteobacteria	0.944318	0.561451	0.371833	k__Bacteria;p__Proteobacteria;c__Gammaproteobacteria;
Bacteroidia	0.00573389	0.253842	0.158128	k__Bacteria;p__Bacteroidota;c__Bacteroidia;
Alphaproteobacteria	0.0172839	0.0217018	0.185106	k__Bacteria;p__Proteobacteria;c__Alphaproteobacteria;
Actinobacteria	0.00439442	0.0419467	0.179067	k__Bacteria;p__Actinobacteriota;c__Actinobacteria;
Bacilli	0.01249	0.064189	0.0921182	k__Bacteria;p__Firmicutes;c__Bacilli;
Clostridia	0.00818959	0.0212671	0.00636838	k__Bacteria;p__Firmicutes;c__Clostridia;
Negativicutes	0.00143347	0.00466466	0.00156272	k__Bacteria;p__Firmicutes;c__Negativicutes;
Acidobacteriae	2.34996e-05	0.00374818	2.34996e-05	k__Bacteria;p__Acidobacteriota;c__Acidobacteriae;
Verrucomicrobiae	0.00109273	0.00301969	0.000869483	k__Bacteria;p__Verrucomicrobiota;c__Verrucomicrobiae;
Thermoleophilia	2.34996e-05	0.00224421	5.87489e-05	k__Bacteria;p__Actinobacteriota;c__Thermoleophilia;
Acidimicrobiia	0.000117498	0.00148047	0.000164497	k__Bacteria;p__Actinobacteriota;c__Acidimicrobiia;
Vicinamibacteria	0	0.000975231	0	k__Bacteria;p__Acidobacteriota;c__Vicinamibacteria;
Planctomycetes	5.87489e-05	0.000881233	0.000328994	k__Bacteria;p__Planctomycetota;c__Planctomycetes;
Coriobacteriia	0.000610988	0.000834234	0.000199746	k__Bacteria;p__Actinobacteriota;c__Coriobacteriia;
Polyangia	0	0.000763735	0	k__Bacteria;p__Myxococcota;c__Polyangia;
Gemmatimonadetes	3.52493e-05	0.000751986	9.39982e-05	k__Bacteria;p__Gemmatimonadota;c__Gemmatimonadetes;
Anaerolineae	0.000234996	0.000622738	0.000270245	k__Bacteria;p__Chloroflexi;c__Anaerolineae;
Kapabacteria	0.000129248	0.000434742	0.000105748	k__Bacteria;p__Bacteroidota;c__Kapabacteria;
Chloroflexia	8.22484e-05	0.000375993	8.22484e-05	k__Bacteria;p__Chloroflexi;c__Chloroflexia;
Oligoflexia	9.39982e-05	0.000317244	0.000140997	k__Bacteria;p__Bdellovibrionota;c__Oligoflexia;
Deferribacteres	0.000176247	0.000281995	4.69991e-05	k__Bacteria;p__Deferribacterota;c__Deferribacteres;
Nitrospiria	3.52493e-05	0.000270245	0	k__Bacteria;p__Nitrospirota;c__Nitrospiria;
Chlamydiae	8.22484e-05	0.000223246	0.000117498	k__Bacteria;p__Verrucomicrobiota;c__Chlamydiae;
Saccharimonadia	7.04987e-05	0.000187996	4.69991e-05	k__Bacteria;p__Patescibacteria;c__Saccharimonadia;
Bdellovibrionia	9.39982e-05	0.000176247	9.39982e-05	k__Bacteria;p__Bdellovibrionota;c__Bdellovibrionia;
MB-A2-108	0	0.000176247	0	k__Bacteria;p__Actinobacteriota;c__MB-A2-108;
Desulfovibrionia	4.69991e-05	0.000164497	0.000105748	k__Bacteria;p__Desulfobacterota;c__Desulfovibrionia;
Myxococcia	0	0.000164497	0	k__Bacteria;p__Myxococcota;c__Myxococcia;
Subgroup_22	0	0.000140997	0	k__Bacteria;p__Acidobacteriota;c__Subgroup_22;
Fusobacteriia	0.000140997	0	8.22484e-05	k__Bacteria;p__Fusobacteriota;c__Fusobacteriia;
Blastocatellia	0	0.000140997	0	k__Bacteria;p__Acidobacteriota;c__Blastocatellia;
Cyanobacteriia	0	9.39982e-05	0	k__Bacteria;p__Cyanobacteria;c__Cyanobacteriia;
Berkelbacteria	2.34996e-05	4.69991e-05	8.22484e-05	k__Bacteria;p__Patescibacteria;c__Berkelbacteria;
AD3	0	8.22484e-05	0	k__Bacteria;p__Chloroflexi;c__AD3;
Desulfuromonadia	0	8.22484e-05	0	k__Bacteria;p__Desulfobacterota;c__Desulfuromonadia;
Methylomirabilia	0	7.04987e-05	0	k__Bacteria;p__Methylomirabilota;c__Methylomirabilia;
MBNT15	0	7.04987e-05	0	k__Bacteria;p__MBNT15;c__MBNT15;
Babeliae	0	5.87489e-05	3.52493e-05	k__Bacteria;p__Dependentiae;c__Babeliae;
WPS-2	0	5.87489e-05	0	k__Bacteria;p__WPS-2;c__WPS-2;
Holophagae	0	4.69991e-05	0	k__Bacteria;p__Acidobacteriota;c__Holophagae;
NB1-j	0	4.69991e-05	0	k__Bacteria;p__NB1-j;c__NB1-j;
Ignavibacteria	0	4.69991e-05	0	k__Bacteria;p__Bacteroidota;c__Ignavibacteria;
Entotheonellia	0	4.69991e-05	0	k__Bacteria;p__Entotheonellaeota;c__Entotheonellia;
Others	0.00298444	0.0118085	0.00286695	Others

## Sheet: Order
Taxonomy	KKL	PY	CDM	Tax_detail
Xanthomonadales	0.815094	0.0121728	0.00736711	k__Bacteria;p__Proteobacteria;c__Gammaproteobacteria;o__Xanthomonadales;
Orbales	0.0470696	0.457407	0.31997	k__Bacteria;p__Proteobacteria;c__Gammaproteobacteria;o__Orbales;
Flavobacteriales	0.00400667	0.247873	0.101119	k__Bacteria;p__Bacteroidota;c__Bacteroidia;o__Flavobacteriales;
Bifidobacteriales	0.00365418	0.037376	0.177927	k__Bacteria;p__Actinobacteriota;c__Actinobacteria;o__Bifidobacteriales;
Rhizobiales	0.0131597	0.0122198	0.174261	k__Bacteria;p__Proteobacteria;c__Alphaproteobacteria;o__Rhizobiales;
Lactobacillales	0.011832	0.0621093	0.0913663	k__Bacteria;p__Firmicutes;c__Bacilli;o__Lactobacillales;
Burkholderiales	0.0735301	0.0730249	0.0269187	k__Bacteria;p__Proteobacteria;c__Gammaproteobacteria;o__Burkholderiales;
Bacteroidales	0.00144522	0.0053344	0.0566457	k__Bacteria;p__Bacteroidota;c__Bacteroidia;o__Bacteroidales;
Enterobacterales	0.00459416	0.00854209	0.00994031	k__Bacteria;p__Proteobacteria;c__Gammaproteobacteria;o__Enterobacterales;
Clostridiales	0.00460591	0.00857734	0.00317244	k__Bacteria;p__Firmicutes;c__Clostridia;o__Clostridiales;
Pseudomonadales	0.00366593	0.00727311	0.0050759	k__Bacteria;p__Proteobacteria;c__Gammaproteobacteria;o__Pseudomonadales;
Acetobacterales	0.000751986	0.00231471	0.00719086	k__Bacteria;p__Proteobacteria;c__Alphaproteobacteria;o__Acetobacterales;
Lachnospirales	0.000928232	0.00455891	0.000740236	k__Bacteria;p__Firmicutes;c__Clostridia;o__Lachnospirales;
Veillonellales-Selenomonadales	0.00140997	0.00444142	0.00151572	k__Bacteria;p__Firmicutes;c__Negativicutes;o__Veillonellales-Selenomonadales;
Rhodobacterales	0.00183297	0.00431217	0.0027142	k__Bacteria;p__Proteobacteria;c__Alphaproteobacteria;o__Rhodobacterales;
Oscillospirales	0.00118673	0.00420642	0.00103398	k__Bacteria;p__Firmicutes;c__Clostridia;o__Oscillospirales;
Peptostreptococcales-Tissierellales	0.00130423	0.00350143	0.00133947	k__Bacteria;p__Firmicutes;c__Clostridia;o__Peptostreptococcales-Tissierellales;
Verrucomicrobiales	0.00109273	0.0028552	0.000834234	k__Bacteria;p__Verrucomicrobiota;c__Verrucomicrobiae;o__Verrucomicrobiales;
Micrococcales	0.000657987	0.00274945	0.00102223	k__Bacteria;p__Actinobacteriota;c__Actinobacteria;o__Micrococcales;
Subgroup_2	0	0.00165672	0	k__Bacteria;p__Acidobacteriota;c__Acidobacteriae;o__Subgroup_2;
Acidobacteriales	0	0.00148047	2.34996e-05	k__Bacteria;p__Acidobacteriota;c__Acidobacteriae;o__Acidobacteriales;
Sphingomonadales	0.00132772	0.00128073	0.000704987	k__Bacteria;p__Proteobacteria;c__Alphaproteobacteria;o__Sphingomonadales;
Gaiellales	0	0.00125723	0	k__Bacteria;p__Actinobacteriota;c__Thermoleophilia;o__Gaiellales;
Erysipelotrichales	0.00052874	0.00118673	0.000375993	k__Bacteria;p__Firmicutes;c__Bacilli;o__Erysipelotrichales;
Microtrichales	8.22484e-05	0.00110448	9.39982e-05	k__Bacteria;p__Actinobacteriota;c__Acidimicrobiia;o__Microtrichales;
Aeromonadales	0.000105748	0.000281995	0.000986981	k__Bacteria;p__Proteobacteria;c__Gammaproteobacteria;o__Aeromonadales;
Solirubrobacterales	2.34996e-05	0.000986981	5.87489e-05	k__Bacteria;p__Actinobacteriota;c__Thermoleophilia;o__Solirubrobacterales;
Vibrionales	0	0.000939982	0.000681487	k__Bacteria;p__Proteobacteria;c__Gammaproteobacteria;o__Vibrionales;
Vicinamibacterales	0	0.000916483	0	k__Bacteria;p__Acidobacteriota;c__Vicinamibacteria;o__Vicinamibacterales;
Coriobacteriales	0.000610988	0.000834234	0.000199746	k__Bacteria;p__Actinobacteriota;c__Coriobacteriia;o__Coriobacteriales;
Propionibacteriales	4.69991e-05	0.000822484	8.22484e-05	k__Bacteria;p__Actinobacteriota;c__Actinobacteria;o__Propionibacteriales;
Corynebacteriales	2.34996e-05	0.000751986	1.17498e-05	k__Bacteria;p__Actinobacteriota;c__Actinobacteria;o__Corynebacteriales;
Gemmatimonadales	3.52493e-05	0.000751986	9.39982e-05	k__Bacteria;p__Gemmatimonadota;c__Gemmatimonadetes;o__Gemmatimonadales;
Alteromonadales	2.34996e-05	0.000234996	0.000704987	k__Bacteria;p__Proteobacteria;c__Gammaproteobacteria;o__Alteromonadales;
Chitinophagales	0.000281995	0.000634488	0.000364243	k__Bacteria;p__Bacteroidota;c__Bacteroidia;o__Chitinophagales;
Staphylococcales	0	0.00050524	0.000270245	k__Bacteria;p__Firmicutes;c__Bacilli;o__Staphylococcales;
Polyangiales	0	0.000493491	0	k__Bacteria;p__Myxococcota;c__Polyangia;o__Polyangiales;
Kapabacteriales	0.000129248	0.000434742	0.000105748	k__Bacteria;p__Bacteroidota;c__Kapabacteria;o__Kapabacteriales;
Solibacterales	0	0.000434742	0	k__Bacteria;p__Acidobacteriota;c__Acidobacteriae;o__Solibacterales;
Gemmatales	2.34996e-05	0.000434742	0.000105748	k__Bacteria;p__Planctomycetota;c__Planctomycetes;o__Gemmatales;
RBG-13-54-9	0.000164497	0.000434742	0.000234996	k__Bacteria;p__Chloroflexi;c__Anaerolineae;o__RBG-13-54-9;
Clostridia_UCG-014	0.000129248	0.000422992	8.22484e-05	k__Bacteria;p__Firmicutes;c__Clostridia;o__Clostridia_UCG-014;
Elsterales	0	0.000399492	3.52493e-05	k__Bacteria;p__Proteobacteria;c__Alphaproteobacteria;o__Elsterales;
Bacillales	0.000129248	0.000387743	0.000105748	k__Bacteria;p__Firmicutes;c__Bacilli;o__Bacillales;
Thermomicrobiales	8.22484e-05	0.000375993	8.22484e-05	k__Bacteria;p__Chloroflexi;c__Chloroflexia;o__Thermomicrobiales;
Cellvibrionales	8.22484e-05	0.000340744	7.04987e-05	k__Bacteria;p__Proteobacteria;c__Gammaproteobacteria;o__Cellvibrionales;
Pirellulales	3.52493e-05	0.000328994	0.000129248	k__Bacteria;p__Planctomycetota;c__Planctomycetes;o__Pirellulales;
Oligoflexales	9.39982e-05	0.000317244	0.000140997	k__Bacteria;p__Bdellovibrionota;c__Oligoflexia;o__Oligoflexales;
Caulobacterales	0.000117498	0.000293744	0.000105748	k__Bacteria;p__Proteobacteria;c__Alphaproteobacteria;o__Caulobacterales;
IMCC26256	3.52493e-05	0.000281995	7.04987e-05	k__Bacteria;p__Actinobacteriota;c__Acidimicrobiia;o__IMCC26256;
Deferribacterales	0.000176247	0.000281995	4.69991e-05	k__Bacteria;p__Deferribacterota;c__Deferribacteres;o__Deferribacterales;
Nitrospirales	3.52493e-05	0.000270245	0	k__Bacteria;p__Nitrospirota;c__Nitrospiria;o__Nitrospirales;
Haliangiales	0	0.000270245	0	k__Bacteria;p__Myxococcota;c__Polyangia;o__Haliangiales;
Azospirillales	0	0.000246745	0	k__Bacteria;p__Proteobacteria;c__Alphaproteobacteria;o__Azospirillales;
Chlamydiales	8.22484e-05	0.000223246	0.000117498	k__Bacteria;p__Verrucomicrobiota;c__Chlamydiae;o__Chlamydiales;
Acidaminococcales	2.34996e-05	0.000223246	4.69991e-05	k__Bacteria;p__Firmicutes;c__Negativicutes;o__Acidaminococcales;
Reyranellales	9.39982e-05	0.000211496	9.39982e-05	k__Bacteria;p__Proteobacteria;c__Alphaproteobacteria;o__Reyranellales;
Saccharimonadales	7.04987e-05	0.000187996	4.69991e-05	k__Bacteria;p__Patescibacteria;c__Saccharimonadia;o__Saccharimonadales;
Frankiales	0	0.000187996	0	k__Bacteria;p__Actinobacteriota;c__Actinobacteria;o__Frankiales;
Bryobacterales	2.34996e-05	0.000176247	0	k__Bacteria;p__Acidobacteriota;c__Acidobacteriae;o__Bryobacterales;
MB-A2-108	0	0.000176247	0	k__Bacteria;p__Actinobacteriota;c__MB-A2-108;o__MB-A2-108;
Steroidobacterales	0	0.000176247	0	k__Bacteria;p__Proteobacteria;c__Gammaproteobacteria;o__Steroidobacterales;
Bdellovibrionales	9.39982e-05	0.000176247	9.39982e-05	k__Bacteria;p__Bdellovibrionota;c__Bdellovibrionia;o__Bdellovibrionales;
Gammaproteobacteria_Incertae_Sedis	0	0.000164497	0	k__Bacteria;p__Proteobacteria;c__Gammaproteobacteria;o__Gammaproteobacteria_Incertae_Sedis;
Micropepsales	0	0.000164497	0	k__Bacteria;p__Proteobacteria;c__Alphaproteobacteria;o__Micropepsales;
Desulfovibrionales	4.69991e-05	0.000164497	0.000105748	k__Bacteria;p__Desulfobacterota;c__Desulfovibrionia;o__Desulfovibrionales;
Myxococcales	0	0.000164497	0	k__Bacteria;p__Myxococcota;c__Myxococcia;o__Myxococcales;
Pasteurellales	0	0.000152747	0	k__Bacteria;p__Proteobacteria;c__Gammaproteobacteria;o__Pasteurellales;
WD260	0	0.000152747	0	k__Bacteria;p__Proteobacteria;c__Gammaproteobacteria;o__WD260;
Subgroup_22	0	0.000140997	0	k__Bacteria;p__Acidobacteriota;c__Subgroup_22;o__Subgroup_22;
Fusobacteriales	0.000140997	0	8.22484e-05	k__Bacteria;p__Fusobacteriota;c__Fusobacteriia;o__Fusobacteriales;
Oceanospirillales	9.39982e-05	0.000140997	3.52493e-05	k__Bacteria;p__Proteobacteria;c__Gammaproteobacteria;o__Oceanospirillales;
PLTA13	0	0.000140997	0	k__Bacteria;p__Proteobacteria;c__Gammaproteobacteria;o__PLTA13;
Caldilineales	7.04987e-05	0.000129248	3.52493e-05	k__Bacteria;p__Chloroflexi;c__Anaerolineae;o__Caldilineales;
Chthoniobacterales	0	0.000117498	0	k__Bacteria;p__Verrucomicrobiota;c__Verrucomicrobiae;o__Chthoniobacterales;
Isosphaerales	0	0.000117498	9.39982e-05	k__Bacteria;p__Planctomycetota;c__Planctomycetes;o__Isosphaerales;
Chloroplast	0	9.39982e-05	0	k__Bacteria;p__Cyanobacteria;c__Cyanobacteriia;o__Chloroplast;
KF-JG30-C25	0	9.39982e-05	0	k__Bacteria;p__Proteobacteria;c__Gammaproteobacteria;o__KF-JG30-C25;
Berkelbacteria	2.34996e-05	4.69991e-05	8.22484e-05	k__Bacteria;p__Patescibacteria;c__Berkelbacteria;o__Berkelbacteria;
Geobacterales	0	8.22484e-05	0	k__Bacteria;p__Desulfobacterota;c__Desulfuromonadia;o__Geobacterales;
AD3	0	8.22484e-05	0	k__Bacteria;p__Chloroflexi;c__AD3;o__AD3;
Tistrellales	0	8.22484e-05	0	k__Bacteria;p__Proteobacteria;c__Alphaproteobacteria;o__Tistrellales;
Rokubacteriales	0	7.04987e-05	0	k__Bacteria;p__Methylomirabilota;c__Methylomirabilia;o__Rokubacteriales;
Pyrinomonadales	0	7.04987e-05	0	k__Bacteria;p__Acidobacteriota;c__Blastocatellia;o__Pyrinomonadales;
MBNT15	0	7.04987e-05	0	k__Bacteria;p__MBNT15;c__MBNT15;o__MBNT15;
Dongiales	0	7.04987e-05	0	k__Bacteria;p__Proteobacteria;c__Alphaproteobacteria;o__Dongiales;
Blastocatellales	0	7.04987e-05	0	k__Bacteria;p__Acidobacteriota;c__Blastocatellia;o__Blastocatellales;
Legionellales	3.52493e-05	7.04987e-05	3.52493e-05	k__Bacteria;p__Proteobacteria;c__Gammaproteobacteria;o__Legionellales;
Subgroup_17	0	5.87489e-05	0	k__Bacteria;p__Acidobacteriota;c__Vicinamibacteria;o__Subgroup_17;
Babeliales	0	5.87489e-05	3.52493e-05	k__Bacteria;p__Dependentiae;c__Babeliae;o__Babeliales;
WPS-2	0	5.87489e-05	0	k__Bacteria;p__WPS-2;c__WPS-2;o__WPS-2;
SBR1031	0	5.87489e-05	0	k__Bacteria;p__Chloroflexi;c__Anaerolineae;o__SBR1031;
Ignavibacteriales	0	4.69991e-05	0	k__Bacteria;p__Bacteroidota;c__Ignavibacteria;o__Ignavibacteriales;
NB1-j	0	4.69991e-05	0	k__Bacteria;p__NB1-j;c__NB1-j;o__NB1-j;
Entotheonellales	0	4.69991e-05	0	k__Bacteria;p__Entotheonellaeota;c__Entotheonellia;o__Entotheonellales;
Subgroup_7	0	4.69991e-05	0	k__Bacteria;p__Acidobacteriota;c__Holophagae;o__Subgroup_7;
Acidithiobacillales	0	4.69991e-05	0	k__Bacteria;p__Proteobacteria;c__Gammaproteobacteria;o__Acidithiobacillales;
Pedosphaerales	0	4.69991e-05	3.52493e-05	k__Bacteria;p__Verrucomicrobiota;c__Verrucomicrobiae;o__Pedosphaerales;
Monoglobales	3.52493e-05	0	0	k__Bacteria;p__Firmicutes;c__Clostridia;o__Monoglobales;
Others	0.00301969	0.012161	0.00293744	Others

## Sheet: family
Taxonomy	KKL	PY	CDM	Tax_detail
Xanthomonadaceae	0.814941	0.0114795	0.00726136	k__Bacteria;p__Proteobacteria;c__Gammaproteobacteria;o__Xanthomonadales;f__Xanthomonadaceae;
Orbaceae	0.0470696	0.457407	0.31997	k__Bacteria;p__Proteobacteria;c__Gammaproteobacteria;o__Orbales;f__Orbaceae;
Weeksellaceae	0.00398317	0.247873	0.101072	k__Bacteria;p__Bacteroidota;c__Bacteroidia;o__Flavobacteriales;f__Weeksellaceae;
Bifidobacteriaceae	0.00365418	0.037376	0.177927	k__Bacteria;p__Actinobacteriota;c__Actinobacteria;o__Bifidobacteriales;f__Bifidobacteriaceae;
Rhizobiaceae	0.0109743	0.00593364	0.172252	k__Bacteria;p__Proteobacteria;c__Alphaproteobacteria;o__Rhizobiales;f__Rhizobiaceae;
Lactobacillaceae	0.0078371	0.0515933	0.0880646	k__Bacteria;p__Firmicutes;c__Bacilli;o__Lactobacillales;f__Lactobacillaceae;
Neisseriaceae	0.0723316	0.0689359	0.0244043	k__Bacteria;p__Proteobacteria;c__Gammaproteobacteria;o__Burkholderiales;f__Neisseriaceae;
Dysgonomonadaceae	0.00110448	0.00105748	0.0556939	k__Bacteria;p__Bacteroidota;c__Bacteroidia;o__Bacteroidales;f__Dysgonomonadaceae;
Clostridiaceae	0.00460591	0.00857734	0.00317244	k__Bacteria;p__Firmicutes;c__Clostridia;o__Clostridiales;f__Clostridiaceae;
Enterococcaceae	0.00353668	0.00810735	0.00253795	k__Bacteria;p__Firmicutes;c__Bacilli;o__Lactobacillales;f__Enterococcaceae;
Acetobacteraceae	0.000751986	0.00231471	0.00719086	k__Bacteria;p__Proteobacteria;c__Alphaproteobacteria;o__Acetobacterales;f__Acetobacteraceae;
Enterobacteriaceae	0.00358368	0.00620388	0.00615688	k__Bacteria;p__Proteobacteria;c__Gammaproteobacteria;o__Enterobacterales;f__Enterobacteriaceae;
Pseudomonadaceae	0.00341919	0.00601589	0.00387743	k__Bacteria;p__Proteobacteria;c__Gammaproteobacteria;o__Pseudomonadales;f__Pseudomonadaceae;
Lachnospiraceae	0.000928232	0.00455891	0.000740236	k__Bacteria;p__Firmicutes;c__Clostridia;o__Lachnospirales;f__Lachnospiraceae;
Rhodobacteraceae	0.00183297	0.00431217	0.0027142	k__Bacteria;p__Proteobacteria;c__Alphaproteobacteria;o__Rhodobacterales;f__Rhodobacteraceae;
Veillonellaceae	0.00108098	0.00352493	0.00125723	k__Bacteria;p__Firmicutes;c__Negativicutes;o__Veillonellales-Selenomonadales;f__Veillonellaceae;
Peptostreptococcaceae	0.00130423	0.00350143	0.00133947	k__Bacteria;p__Firmicutes;c__Clostridia;o__Peptostreptococcales-Tissierellales;f__Peptostreptococcaceae;
Ruminococcaceae	0.000916483	0.00297269	0.000834234	k__Bacteria;p__Firmicutes;c__Clostridia;o__Oscillospirales;f__Ruminococcaceae;
Bacteroidaceae	0.000293744	0.0027142	0.000446492	k__Bacteria;p__Bacteroidota;c__Bacteroidia;o__Bacteroidales;f__Bacteroidaceae;
Erwiniaceae	0.000187996	0.000258495	0.0025967	k__Bacteria;p__Proteobacteria;c__Gammaproteobacteria;o__Enterobacterales;f__Erwiniaceae;
Xanthobacteraceae	0.000246745	0.00253795	0.000364243	k__Bacteria;p__Proteobacteria;c__Alphaproteobacteria;o__Rhizobiales;f__Xanthobacteraceae;
Streptococcaceae	0.000352493	0.00215021	0.000763735	k__Bacteria;p__Firmicutes;c__Bacilli;o__Lactobacillales;f__Streptococcaceae;
Microbacteriaceae	0.000575739	0.00190346	0.000904733	k__Bacteria;p__Actinobacteriota;c__Actinobacteria;o__Micrococcales;f__Microbacteriaceae;
Yersiniaceae	0.000634488	0.00178597	0.00109273	k__Bacteria;p__Proteobacteria;c__Gammaproteobacteria;o__Enterobacterales;f__Yersiniaceae;
Subgroup_2	0	0.00165672	0	k__Bacteria;p__Acidobacteriota;c__Acidobacteriae;o__Subgroup_2;f__Subgroup_2;
Beijerinckiaceae	0.000751986	0.00142172	0.000634488	k__Bacteria;p__Proteobacteria;c__Alphaproteobacteria;o__Rhizobiales;f__Beijerinckiaceae;
Sphingomonadaceae	0.00132772	0.00128073	0.000704987	k__Bacteria;p__Proteobacteria;c__Alphaproteobacteria;o__Sphingomonadales;f__Sphingomonadaceae;
Chromobacteriaceae	0.000152747	0.000317244	0.00126898	k__Bacteria;p__Proteobacteria;c__Gammaproteobacteria;o__Burkholderiales;f__Chromobacteriaceae;
Moraxellaceae	0.000246745	0.00125723	0.00119848	k__Bacteria;p__Proteobacteria;c__Gammaproteobacteria;o__Pseudomonadales;f__Moraxellaceae;
Verrucomicrobiaceae	0.000458241	0.00119848	0.000458241	k__Bacteria;p__Verrucomicrobiota;c__Verrucomicrobiae;o__Verrucomicrobiales;f__Verrucomicrobiaceae;
Burkholderiaceae	0.000375993	0.00104573	0.000669737	k__Bacteria;p__Proteobacteria;c__Gammaproteobacteria;o__Burkholderiales;f__Burkholderiaceae;
Erysipelotrichaceae	0.000411242	0.00102223	0.000317244	k__Bacteria;p__Firmicutes;c__Bacilli;o__Erysipelotrichales;f__Erysipelotrichaceae;
Aeromonadaceae	0.000105748	0.000281995	0.000986981	k__Bacteria;p__Proteobacteria;c__Gammaproteobacteria;o__Aeromonadales;f__Aeromonadaceae;
Vibrionaceae	0	0.000939982	0.000681487	k__Bacteria;p__Proteobacteria;c__Gammaproteobacteria;o__Vibrionales;f__Vibrionaceae;
Selenomonadaceae	0.000328994	0.000916483	0.000258495	k__Bacteria;p__Firmicutes;c__Negativicutes;o__Veillonellales-Selenomonadales;f__Selenomonadaceae;
Prevotellaceae	0	0.000857734	9.39982e-05	k__Bacteria;p__Bacteroidota;c__Bacteroidia;o__Bacteroidales;f__Prevotellaceae;
Coriobacteriaceae	0.000610988	0.000834234	0.000199746	k__Bacteria;p__Actinobacteriota;c__Coriobacteriia;o__Coriobacteriales;f__Coriobacteriaceae;
DEV007	0.000258495	0.000834234	0.000281995	k__Bacteria;p__Verrucomicrobiota;c__Verrucomicrobiae;o__Verrucomicrobiales;f__DEV007;
Comamonadaceae	0.000223246	0.000834234	0.000246745	k__Bacteria;p__Proteobacteria;c__Gammaproteobacteria;o__Burkholderiales;f__Comamonadaceae;
Rhizobiales_Incertae_Sedis	0.000599239	0.000822484	0.000481741	k__Bacteria;p__Proteobacteria;c__Alphaproteobacteria;o__Rhizobiales;f__Rhizobiales_Incertae_Sedis;
Propionibacteriaceae	4.69991e-05	0.000822484	8.22484e-05	k__Bacteria;p__Actinobacteriota;c__Actinobacteria;o__Propionibacteriales;f__Propionibacteriaceae;
Gemmatimonadaceae	3.52493e-05	0.000751986	9.39982e-05	k__Bacteria;p__Gemmatimonadota;c__Gemmatimonadetes;o__Gemmatimonadales;f__Gemmatimonadaceae;
Oscillospiraceae	0.000129248	0.000693237	0.000129248	k__Bacteria;p__Firmicutes;c__Clostridia;o__Oscillospirales;f__Oscillospiraceae;
Rhodanobacteraceae	0.000152747	0.000693237	0.000105748	k__Bacteria;p__Proteobacteria;c__Gammaproteobacteria;o__Xanthomonadales;f__Rhodanobacteraceae;
Corynebacteriaceae	2.34996e-05	0.000657987	1.17498e-05	k__Bacteria;p__Actinobacteriota;c__Actinobacteria;o__Corynebacteriales;f__Corynebacteriaceae;
Hyphomicrobiaceae	0.000458241	0.000634488	0.000364243	k__Bacteria;p__Proteobacteria;c__Alphaproteobacteria;o__Rhizobiales;f__Hyphomicrobiaceae;
Chitinophagaceae	0.000281995	0.000634488	0.000364243	k__Bacteria;p__Bacteroidota;c__Bacteroidia;o__Chitinophagales;f__Chitinophagaceae;
Micrococcaceae	8.22484e-05	0.000610988	0.000117498	k__Bacteria;p__Actinobacteriota;c__Actinobacteria;o__Micrococcales;f__Micrococcaceae;
Solirubrobacteraceae	0	0.000563989	0	k__Bacteria;p__Actinobacteriota;c__Thermoleophilia;o__Solirubrobacterales;f__Solirubrobacteraceae;
Alteromonadaceae	0	0	0.00050524	k__Bacteria;p__Proteobacteria;c__Gammaproteobacteria;o__Alteromonadales;f__Alteromonadaceae;
Staphylococcaceae	0	0.00050524	0.000270245	k__Bacteria;p__Firmicutes;c__Bacilli;o__Staphylococcales;f__Staphylococcaceae;
Sutterellaceae	0.000293744	0.000458241	0.000105748	k__Bacteria;p__Proteobacteria;c__Gammaproteobacteria;o__Burkholderiales;f__Sutterellaceae;
Gemmataceae	2.34996e-05	0.000434742	0.000105748	k__Bacteria;p__Planctomycetota;c__Planctomycetes;o__Gemmatales;f__Gemmataceae;
Solibacteraceae	0	0.000434742	0	k__Bacteria;p__Acidobacteriota;c__Acidobacteriae;o__Solibacterales;f__Solibacteraceae;
Gaiellaceae	0	0.000434742	0	k__Bacteria;p__Actinobacteriota;c__Thermoleophilia;o__Gaiellales;f__Gaiellaceae;
RBG-13-54-9	0.000164497	0.000434742	0.000234996	k__Bacteria;p__Chloroflexi;c__Anaerolineae;o__RBG-13-54-9;f__RBG-13-54-9;
Kapabacteriales	0.000129248	0.000434742	0.000105748	k__Bacteria;p__Bacteroidota;c__Kapabacteria;o__Kapabacteriales;f__Kapabacteriales;
Acidobacteriaceae_(Subgroup_1)	0	0.000422992	0	k__Bacteria;p__Acidobacteriota;c__Acidobacteriae;o__Acidobacteriales;f__Acidobacteriaceae_(Subgroup_1);
Clostridia_UCG-014	0.000129248	0.000422992	8.22484e-05	k__Bacteria;p__Firmicutes;c__Clostridia;o__Clostridia_UCG-014;f__Clostridia_UCG-014;
Eubacterium_coprostanoligenes_group	0.000140997	0.000422992	7.04987e-05	k__Bacteria;p__Firmicutes;c__Clostridia;o__Oscillospirales;f__Eubacterium_coprostanoligenes_group;
Rubritaleaceae	0.000187996	0.000411242	9.39982e-05	k__Bacteria;p__Verrucomicrobiota;c__Verrucomicrobiae;o__Verrucomicrobiales;f__Rubritaleaceae;
Iamiaceae	8.22484e-05	0.000387743	7.04987e-05	k__Bacteria;p__Actinobacteriota;c__Acidimicrobiia;o__Microtrichales;f__Iamiaceae;
JG30-KF-CM45	8.22484e-05	0.000375993	8.22484e-05	k__Bacteria;p__Chloroflexi;c__Chloroflexia;o__Thermomicrobiales;f__JG30-KF-CM45;
Bacillaceae	0.000129248	0.000340744	0.000105748	k__Bacteria;p__Firmicutes;c__Bacilli;o__Bacillales;f__Bacillaceae;
Pirellulaceae	3.52493e-05	0.000328994	0.000129248	k__Bacteria;p__Planctomycetota;c__Planctomycetes;o__Pirellulales;f__Pirellulaceae;
Nitrosomonadaceae	0	0.000328994	4.69991e-05	k__Bacteria;p__Proteobacteria;c__Gammaproteobacteria;o__Burkholderiales;f__Nitrosomonadaceae;
Vicinamibacteraceae	0	0.000328994	0	k__Bacteria;p__Acidobacteriota;c__Vicinamibacteria;o__Vicinamibacterales;f__Vicinamibacteraceae;
Muribaculaceae	0	0.000317244	0.000187996	k__Bacteria;p__Bacteroidota;c__Bacteroidia;o__Bacteroidales;f__Muribaculaceae;
Rikenellaceae	4.69991e-05	0.000305494	0.000176247	k__Bacteria;p__Bacteroidota;c__Bacteroidia;o__Bacteroidales;f__Rikenellaceae;
Morganellaceae	0.000187996	0.000293744	9.39982e-05	k__Bacteria;p__Proteobacteria;c__Gammaproteobacteria;o__Enterobacterales;f__Morganellaceae;
Devosiaceae	2.34996e-05	0.000293744	3.52493e-05	k__Bacteria;p__Proteobacteria;c__Alphaproteobacteria;o__Rhizobiales;f__Devosiaceae;
IMCC26256	3.52493e-05	0.000281995	7.04987e-05	k__Bacteria;p__Actinobacteriota;c__Acidimicrobiia;o__IMCC26256;f__IMCC26256;
Deferribacteraceae	0.000176247	0.000281995	4.69991e-05	k__Bacteria;p__Deferribacterota;c__Deferribacteres;o__Deferribacterales;f__Deferribacteraceae;
Nitrospiraceae	3.52493e-05	0.000270245	0	k__Bacteria;p__Nitrospirota;c__Nitrospiria;o__Nitrospirales;f__Nitrospiraceae;
Haliangiaceae	0	0.000270245	0	k__Bacteria;p__Myxococcota;c__Polyangia;o__Haliangiales;f__Haliangiaceae;
Akkermansiaceae	0.000140997	0.000258495	0	k__Bacteria;p__Verrucomicrobiota;c__Verrucomicrobiae;o__Verrucomicrobiales;f__Akkermansiaceae;
A21b	0	0.000258495	0	k__Bacteria;p__Proteobacteria;c__Gammaproteobacteria;o__Burkholderiales;f__A21b;
Polyangiaceae	0	0.000258495	0	k__Bacteria;p__Myxococcota;c__Polyangia;o__Polyangiales;f__Polyangiaceae;
Microtrichaceae	0	0.000246745	0	k__Bacteria;p__Actinobacteriota;c__Acidimicrobiia;o__Microtrichales;f__Microtrichaceae;
Ilumatobacteraceae	0	0.000246745	0	k__Bacteria;p__Actinobacteriota;c__Acidimicrobiia;o__Microtrichales;f__Ilumatobacteraceae;
SC-I-84	0	0.000234996	0	k__Bacteria;p__Proteobacteria;c__Gammaproteobacteria;o__Burkholderiales;f__SC-I-84;
Pseudoalteromonadaceae	2.34996e-05	0.000234996	0.000199746	k__Bacteria;p__Proteobacteria;c__Gammaproteobacteria;o__Alteromonadales;f__Pseudoalteromonadaceae;
67-14	2.34996e-05	0.000234996	5.87489e-05	k__Bacteria;p__Actinobacteriota;c__Thermoleophilia;o__Solirubrobacterales;f__67-14;
Parachlamydiaceae	8.22484e-05	0.000223246	0.000117498	k__Bacteria;p__Verrucomicrobiota;c__Chlamydiae;o__Chlamydiales;f__Parachlamydiaceae;
Acidaminococcaceae	2.34996e-05	0.000223246	4.69991e-05	k__Bacteria;p__Firmicutes;c__Negativicutes;o__Acidaminococcales;f__Acidaminococcaceae;
Cellvibrionaceae	8.22484e-05	0.000211496	7.04987e-05	k__Bacteria;p__Proteobacteria;c__Gammaproteobacteria;o__Cellvibrionales;f__Cellvibrionaceae;
Caulobacteraceae	0.000105748	0.000211496	8.22484e-05	k__Bacteria;p__Proteobacteria;c__Alphaproteobacteria;o__Caulobacterales;f__Caulobacteraceae;
Reyranellaceae	9.39982e-05	0.000211496	9.39982e-05	k__Bacteria;p__Proteobacteria;c__Alphaproteobacteria;o__Reyranellales;f__Reyranellaceae;
Chitinibacteraceae	8.22484e-05	0.000199746	0.000105748	k__Bacteria;p__Proteobacteria;c__Gammaproteobacteria;o__Burkholderiales;f__Chitinibacteraceae;
Saccharimonadales	7.04987e-05	0.000187996	4.69991e-05	k__Bacteria;p__Patescibacteria;c__Saccharimonadia;o__Saccharimonadales;f__Saccharimonadales;
Bryobacteraceae	2.34996e-05	0.000176247	0	k__Bacteria;p__Acidobacteriota;c__Acidobacteriae;o__Bryobacterales;f__Bryobacteraceae;
Bdellovibrionaceae	9.39982e-05	0.000176247	9.39982e-05	k__Bacteria;p__Bdellovibrionota;c__Bdellovibrionia;o__Bdellovibrionales;f__Bdellovibrionaceae;
Pleomorphomonadaceae	0	0.000176247	0	k__Bacteria;p__Proteobacteria;c__Alphaproteobacteria;o__Rhizobiales;f__Pleomorphomonadaceae;
MB-A2-108	0	0.000176247	0	k__Bacteria;p__Actinobacteriota;c__MB-A2-108;o__MB-A2-108;f__MB-A2-108;
TRA3-20	0	0.000176247	0	k__Bacteria;p__Proteobacteria;c__Gammaproteobacteria;o__Burkholderiales;f__TRA3-20;
Azospirillaceae	0	0.000176247	0	k__Bacteria;p__Proteobacteria;c__Alphaproteobacteria;o__Azospirillales;f__Azospirillaceae;
Leuconostocaceae	0.000105748	0.000164497	0	k__Bacteria;p__Firmicutes;c__Bacilli;o__Lactobacillales;f__Leuconostocaceae;
Unknown_Family	0	0.000164497	0	k__Bacteria;p__Proteobacteria;c__Gammaproteobacteria;o__Gammaproteobacteria_Incertae_Sedis;f__Unknown_Family;
Erysipelatoclostridiaceae	0.000117498	0.000164497	5.87489e-05	k__Bacteria;p__Firmicutes;c__Bacilli;o__Erysipelotrichales;f__Erysipelatoclostridiaceae;
Methyloligellaceae	0	0.000164497	5.87489e-05	k__Bacteria;p__Proteobacteria;c__Alphaproteobacteria;o__Rhizobiales;f__Methyloligellaceae;
Micropepsaceae	0	0.000164497	0	k__Bacteria;p__Proteobacteria;c__Alphaproteobacteria;o__Micropepsales;f__Micropepsaceae;
Desulfovibrionaceae	4.69991e-05	0.000164497	0.000105748	k__Bacteria;p__Desulfobacterota;c__Desulfovibrionia;o__Desulfovibrionales;f__Desulfovibrionaceae;
WD260	0	0.000152747	0	k__Bacteria;p__Proteobacteria;c__Gammaproteobacteria;o__WD260;f__WD260;
Pasteurellaceae	0	0.000152747	0	k__Bacteria;p__Proteobacteria;c__Gammaproteobacteria;o__Pasteurellales;f__Pasteurellaceae;
PLTA13	0	0.000140997	0	k__Bacteria;p__Proteobacteria;c__Gammaproteobacteria;o__PLTA13;f__PLTA13;
Oxalobacteraceae	0	0.000140997	0	k__Bacteria;p__Proteobacteria;c__Gammaproteobacteria;o__Burkholderiales;f__Oxalobacteraceae;
Subgroup_22	0	0.000140997	0	k__Bacteria;p__Acidobacteriota;c__Subgroup_22;o__Subgroup_22;f__Subgroup_22;
Fusobacteriaceae	0.000140997	0	8.22484e-05	k__Bacteria;p__Fusobacteriota;c__Fusobacteriia;o__Fusobacteriales;f__Fusobacteriaceae;
Caldilineaceae	7.04987e-05	0.000129248	3.52493e-05	k__Bacteria;p__Chloroflexi;c__Anaerolineae;o__Caldilineales;f__Caldilineaceae;
Halieaceae	0	0.000129248	0	k__Bacteria;p__Proteobacteria;c__Gammaproteobacteria;o__Cellvibrionales;f__Halieaceae;
Isosphaeraceae	0	0.000117498	9.39982e-05	k__Bacteria;p__Planctomycetota;c__Planctomycetes;o__Isosphaerales;f__Isosphaeraceae;
Koribacteraceae	0	0.000117498	0	k__Bacteria;p__Acidobacteriota;c__Acidobacteriae;o__Acidobacteriales;f__Koribacteraceae;
Butyricicoccaceae	0	0.000117498	0	k__Bacteria;p__Firmicutes;c__Clostridia;o__Oscillospirales;f__Butyricicoccaceae;
Chthoniobacteraceae	0	0.000117498	0	k__Bacteria;p__Verrucomicrobiota;c__Verrucomicrobiae;o__Chthoniobacterales;f__Chthoniobacteraceae;
Acidothermaceae	0	0.000105748	0	k__Bacteria;p__Actinobacteriota;c__Actinobacteria;o__Frankiales;f__Acidothermaceae;
Rhodocyclaceae	7.04987e-05	9.39982e-05	7.04987e-05	k__Bacteria;p__Proteobacteria;c__Gammaproteobacteria;o__Burkholderiales;f__Rhodocyclaceae;
KF-JG30-C25	0	9.39982e-05	0	k__Bacteria;p__Proteobacteria;c__Gammaproteobacteria;o__KF-JG30-C25;f__KF-JG30-C25;
Mycobacteriaceae	0	9.39982e-05	0	k__Bacteria;p__Actinobacteriota;c__Actinobacteria;o__Corynebacteriales;f__Mycobacteriaceae;
Carnobacteriaceae	0	9.39982e-05	0	k__Bacteria;p__Firmicutes;c__Bacilli;o__Lactobacillales;f__Carnobacteriaceae;
Phaselicystidaceae	0	9.39982e-05	0	k__Bacteria;p__Myxococcota;c__Polyangia;o__Polyangiales;f__Phaselicystidaceae;
Steroidobacteraceae	0	9.39982e-05	0	k__Bacteria;p__Proteobacteria;c__Gammaproteobacteria;o__Steroidobacterales;f__Steroidobacteraceae;
Chloroplast	0	9.39982e-05	0	k__Bacteria;p__Cyanobacteria;c__Cyanobacteriia;o__Chloroplast;f__Chloroplast;
Dermacoccaceae	0	9.39982e-05	0	k__Bacteria;p__Actinobacteriota;c__Actinobacteria;o__Micrococcales;f__Dermacoccaceae;
Hyphomonadaceae	1.17498e-05	8.22484e-05	2.34996e-05	k__Bacteria;p__Proteobacteria;c__Alphaproteobacteria;o__Caulobacterales;f__Hyphomonadaceae;
Anaeromyxobacteraceae	0	8.22484e-05	0	k__Bacteria;p__Myxococcota;c__Myxococcia;o__Myxococcales;f__Anaeromyxobacteraceae;
Geminicoccaceae	0	8.22484e-05	0	k__Bacteria;p__Proteobacteria;c__Alphaproteobacteria;o__Tistrellales;f__Geminicoccaceae;
Nakamurellaceae	0	8.22484e-05	0	k__Bacteria;p__Actinobacteriota;c__Actinobacteria;o__Frankiales;f__Nakamurellaceae;
Woeseiaceae	0	8.22484e-05	0	k__Bacteria;p__Proteobacteria;c__Gammaproteobacteria;o__Steroidobacterales;f__Woeseiaceae;
Barnesiellaceae	0	8.22484e-05	4.69991e-05	k__Bacteria;p__Bacteroidota;c__Bacteroidia;o__Bacteroidales;f__Barnesiellaceae;
Geobacteraceae	0	8.22484e-05	0	k__Bacteria;p__Desulfobacterota;c__Desulfuromonadia;o__Geobacterales;f__Geobacteraceae;
Myxococcaceae	0	8.22484e-05	0	k__Bacteria;p__Myxococcota;c__Myxococcia;o__Myxococcales;f__Myxococcaceae;
AD3	0	8.22484e-05	0	k__Bacteria;p__Chloroflexi;c__AD3;o__AD3;f__AD3;
Berkelbacteria	2.34996e-05	4.69991e-05	8.22484e-05	k__Bacteria;p__Patescibacteria;c__Berkelbacteria;o__Berkelbacteria;f__Berkelbacteria;
Rokubacteriales	0	7.04987e-05	0	k__Bacteria;p__Methylomirabilota;c__Methylomirabilia;o__Rokubacteriales;f__Rokubacteriales;
Pseudohongiellaceae	4.69991e-05	7.04987e-05	3.52493e-05	k__Bacteria;p__Proteobacteria;c__Gammaproteobacteria;o__Oceanospirillales;f__Pseudohongiellaceae;
Blastocatellaceae	0	7.04987e-05	0	k__Bacteria;p__Acidobacteriota;c__Blastocatellia;o__Blastocatellales;f__Blastocatellaceae;
Bogoriellaceae	0	7.04987e-05	0	k__Bacteria;p__Actinobacteriota;c__Actinobacteria;o__Micrococcales;f__Bogoriellaceae;
Intrasporangiaceae	0	7.04987e-05	0	k__Bacteria;p__Actinobacteriota;c__Actinobacteria;o__Micrococcales;f__Intrasporangiaceae;
Legionellaceae	3.52493e-05	7.04987e-05	3.52493e-05	k__Bacteria;p__Proteobacteria;c__Gammaproteobacteria;o__Legionellales;f__Legionellaceae;
MBNT15	0	7.04987e-05	0	k__Bacteria;p__MBNT15;c__MBNT15;o__MBNT15;f__MBNT15;
Halomonadaceae	0	7.04987e-05	0	k__Bacteria;p__Proteobacteria;c__Gammaproteobacteria;o__Oceanospirillales;f__Halomonadaceae;
Dongiaceae	0	7.04987e-05	0	k__Bacteria;p__Proteobacteria;c__Alphaproteobacteria;o__Dongiales;f__Dongiaceae;
Azospirillales_Incertae_Sedis	0	7.04987e-05	0	k__Bacteria;p__Proteobacteria;c__Alphaproteobacteria;o__Azospirillales;f__Azospirillales_Incertae_Sedis;
Pyrinomonadaceae	0	7.04987e-05	0	k__Bacteria;p__Acidobacteriota;c__Blastocatellia;o__Pyrinomonadales;f__Pyrinomonadaceae;
A4b	0	5.87489e-05	0	k__Bacteria;p__Chloroflexi;c__Anaerolineae;o__SBR1031;f__A4b;
WPS-2	0	5.87489e-05	0	k__Bacteria;p__WPS-2;c__WPS-2;o__WPS-2;f__WPS-2;
Subgroup_17	0	5.87489e-05	0	k__Bacteria;p__Acidobacteriota;c__Vicinamibacteria;o__Subgroup_17;f__Subgroup_17;
BIrii41	0	4.69991e-05	0	k__Bacteria;p__Myxococcota;c__Polyangia;o__Polyangiales;f__BIrii41;
Pedosphaeraceae	0	4.69991e-05	3.52493e-05	k__Bacteria;p__Verrucomicrobiota;c__Verrucomicrobiae;o__Pedosphaerales;f__Pedosphaeraceae;
Subgroup_7	0	4.69991e-05	0	k__Bacteria;p__Acidobacteriota;c__Holophagae;o__Subgroup_7;f__Subgroup_7;
Ignavibacteriaceae	0	4.69991e-05	0	k__Bacteria;p__Bacteroidota;c__Ignavibacteria;o__Ignavibacteriales;f__Ignavibacteriaceae;
Acidithiobacillaceae	0	4.69991e-05	0	k__Bacteria;p__Proteobacteria;c__Gammaproteobacteria;o__Acidithiobacillales;f__Acidithiobacillaceae;
NB1-j	0	4.69991e-05	0	k__Bacteria;p__NB1-j;c__NB1-j;o__NB1-j;f__NB1-j;
Planococcaceae	0	4.69991e-05	0	k__Bacteria;p__Firmicutes;c__Bacilli;o__Bacillales;f__Planococcaceae;
Flavobacteriaceae	2.34996e-05	0	4.69991e-05	k__Bacteria;p__Bacteroidota;c__Bacteroidia;o__Flavobacteriales;f__Flavobacteriaceae;
Entotheonellaceae	0	4.69991e-05	0	k__Bacteria;p__Entotheonellaeota;c__Entotheonellia;o__Entotheonellales;f__Entotheonellaceae;
Alcanivoracaceae	4.69991e-05	0	0	k__Bacteria;p__Proteobacteria;c__Gammaproteobacteria;o__Oceanospirillales;f__Alcanivoracaceae;
Elsteraceae	0	0	3.52493e-05	k__Bacteria;p__Proteobacteria;c__Alphaproteobacteria;o__Elsterales;f__Elsteraceae;
Monoglobaceae	3.52493e-05	0	0	k__Bacteria;p__Firmicutes;c__Clostridia;o__Monoglobales;f__Monoglobaceae;
Others	0.00326644	0.0161794	0.00323119	Others

## Sheet: genus
Taxonomy	KKL	PY	CDM	Tax_detail
Stenotrophomonas	0.814718	0.010986	0.00713211	k__Bacteria;p__Proteobacteria;c__Gammaproteobacteria;o__Xanthomonadales;f__Xanthomonadaceae;g__Stenotrophomonas;
Gilliamella	0.0470696	0.457407	0.31997	k__Bacteria;p__Proteobacteria;c__Gammaproteobacteria;o__Orbales;f__Orbaceae;g__Gilliamella;
Apibacter	0.00398317	0.247873	0.101072	k__Bacteria;p__Bacteroidota;c__Bacteroidia;o__Flavobacteriales;f__Weeksellaceae;g__Apibacter;
Bifidobacterium	0.00365418	0.0373055	0.177927	k__Bacteria;p__Actinobacteriota;c__Actinobacteria;o__Bifidobacteriales;f__Bifidobacteriaceae;g__Bifidobacterium;
Lactobacillus	0.0078371	0.0515345	0.0880646	k__Bacteria;p__Firmicutes;c__Bacilli;o__Lactobacillales;f__Lactobacillaceae;g__Lactobacillus;
Snodgrassella	0.0723316	0.0686539	0.024275	k__Bacteria;p__Proteobacteria;c__Gammaproteobacteria;o__Burkholderiales;f__Neisseriaceae;g__Snodgrassella;
Dysgonomonas	0.00110448	0.00105748	0.0556939	k__Bacteria;p__Bacteroidota;c__Bacteroidia;o__Bacteroidales;f__Dysgonomonadaceae;g__Dysgonomonas;
Clostridium_sensu_stricto_1	0.00460591	0.00857734	0.00317244	k__Bacteria;p__Firmicutes;c__Clostridia;o__Clostridiales;f__Clostridiaceae;g__Clostridium_sensu_stricto_1;
Enterococcus	0.00353668	0.00810735	0.00253795	k__Bacteria;p__Firmicutes;c__Bacilli;o__Lactobacillales;f__Enterococcaceae;g__Enterococcus;
Bombella	0.000352493	0.00144522	0.00682662	k__Bacteria;p__Proteobacteria;c__Alphaproteobacteria;o__Acetobacterales;f__Acetobacteraceae;g__Bombella;
Pseudomonas	0.00341919	0.00601589	0.00387743	k__Bacteria;p__Proteobacteria;c__Gammaproteobacteria;o__Pseudomonadales;f__Pseudomonadaceae;g__Pseudomonas;
Romboutsia	0.00130423	0.00328994	0.00133947	k__Bacteria;p__Firmicutes;c__Clostridia;o__Peptostreptococcales-Tissierellales;f__Peptostreptococcaceae;g__Romboutsia;
Escherichia-Shigella	0.00198571	0.00306669	0.000775485	k__Bacteria;p__Proteobacteria;c__Gammaproteobacteria;o__Enterobacterales;f__Enterobacteriaceae;g__Escherichia-Shigella;
Megasphaera	0.000434742	0.00272595	0.000975231	k__Bacteria;p__Firmicutes;c__Negativicutes;o__Veillonellales-Selenomonadales;f__Veillonellaceae;g__Megasphaera;
Bacteroides	0.000293744	0.0027142	0.000446492	k__Bacteria;p__Bacteroidota;c__Bacteroidia;o__Bacteroidales;f__Bacteroidaceae;g__Bacteroides;
Pantoea	0.000187996	0.000258495	0.0025967	k__Bacteria;p__Proteobacteria;c__Gammaproteobacteria;o__Enterobacterales;f__Erwiniaceae;g__Pantoea;
Faecalibacterium	0.000681487	0.00239695	0.000610988	k__Bacteria;p__Firmicutes;c__Clostridia;o__Oscillospirales;f__Ruminococcaceae;g__Faecalibacterium;
Microbacterium	0.000575739	0.00184471	0.000904733	k__Bacteria;p__Actinobacteriota;c__Actinobacteria;o__Micrococcales;f__Microbacteriaceae;g__Microbacterium;
Streptococcus	0.000223246	0.00182122	0.00055224	k__Bacteria;p__Firmicutes;c__Bacilli;o__Lactobacillales;f__Streptococcaceae;g__Streptococcus;
Serratia	0.000634488	0.00178597	0.00109273	k__Bacteria;p__Proteobacteria;c__Gammaproteobacteria;o__Enterobacterales;f__Yersiniaceae;g__Serratia;
Subgroup_2	0	0.00165672	0	k__Bacteria;p__Acidobacteriota;c__Acidobacteriae;o__Subgroup_2;f__Subgroup_2;g__Subgroup_2;
Vogesella	0.000152747	0.000317244	0.00126898	k__Bacteria;p__Proteobacteria;c__Gammaproteobacteria;o__Burkholderiales;f__Chromobacteriaceae;g__Vogesella;
Sphingomonas	0.00124548	0.00110448	0.000610988	k__Bacteria;p__Proteobacteria;c__Alphaproteobacteria;o__Sphingomonadales;f__Sphingomonadaceae;g__Sphingomonas;
Acinetobacter	0.000246745	0.00118673	0.00112798	k__Bacteria;p__Proteobacteria;c__Gammaproteobacteria;o__Pseudomonadales;f__Moraxellaceae;g__Acinetobacter;
Gemmobacter	0.00051699	0.00105748	0.000881233	k__Bacteria;p__Proteobacteria;c__Alphaproteobacteria;o__Rhodobacterales;f__Rhodobacteraceae;g__Gemmobacter;
Aeromonas	0.000105748	0.000281995	0.000986981	k__Bacteria;p__Proteobacteria;c__Gammaproteobacteria;o__Aeromonadales;f__Aeromonadaceae;g__Aeromonas;
Ralstonia	0.000364243	0.000963482	0.000575739	k__Bacteria;p__Proteobacteria;c__Gammaproteobacteria;o__Burkholderiales;f__Burkholderiaceae;g__Ralstonia;
Vibrio	0	0.000939982	0.000681487	k__Bacteria;p__Proteobacteria;c__Gammaproteobacteria;o__Vibrionales;f__Vibrionaceae;g__Vibrio;
Prevotella	0	0.000857734	9.39982e-05	k__Bacteria;p__Bacteroidota;c__Bacteroidia;o__Bacteroidales;f__Prevotellaceae;g__Prevotella;
Roseburia	0.000293744	0.000845984	0.000176247	k__Bacteria;p__Firmicutes;c__Clostridia;o__Lachnospirales;f__Lachnospiraceae;g__Roseburia;
DEV007	0.000258495	0.000834234	0.000281995	k__Bacteria;p__Verrucomicrobiota;c__Verrucomicrobiae;o__Verrucomicrobiales;f__DEV007;g__DEV007;
Collinsella	0.000610988	0.000834234	0.000199746	k__Bacteria;p__Actinobacteriota;c__Coriobacteriia;o__Coriobacteriales;f__Coriobacteriaceae;g__Collinsella;
Cutibacterium	4.69991e-05	0.000822484	8.22484e-05	k__Bacteria;p__Actinobacteriota;c__Actinobacteria;o__Propionibacteriales;f__Propionibacteriaceae;g__Cutibacterium;
Mitsuokella	0.000328994	0.000822484	0.000258495	k__Bacteria;p__Firmicutes;c__Negativicutes;o__Veillonellales-Selenomonadales;f__Selenomonadaceae;g__Mitsuokella;
Enterobacter	0	0.000223246	0.000751986	k__Bacteria;p__Proteobacteria;c__Gammaproteobacteria;o__Enterobacterales;f__Enterobacteriaceae;g__Enterobacter;
Blautia	8.22484e-05	0.000728486	0.000129248	k__Bacteria;p__Firmicutes;c__Clostridia;o__Lachnospirales;f__Lachnospiraceae;g__Blautia;
alphaI_cluster	0.000317244	0.000657987	0.000352493	k__Bacteria;p__Proteobacteria;c__Alphaproteobacteria;o__Rhizobiales;f__Beijerinckiaceae;g__alphaI_cluster;
Pseudorhodoplanes	0.000246745	0.000646238	0.000364243	k__Bacteria;p__Proteobacteria;c__Alphaproteobacteria;o__Rhizobiales;f__Xanthobacteraceae;g__Pseudorhodoplanes;
Hyphomicrobium	0.000364243	0.000634488	0.000305494	k__Bacteria;p__Proteobacteria;c__Alphaproteobacteria;o__Rhizobiales;f__Hyphomicrobiaceae;g__Hyphomicrobium;
Klebsiella	9.39982e-05	0.000187996	0.00054049	k__Bacteria;p__Proteobacteria;c__Gammaproteobacteria;o__Enterobacterales;f__Enterobacteriaceae;g__Klebsiella;
Turicibacter	0.000258495	0.00054049	0.000211496	k__Bacteria;p__Firmicutes;c__Bacilli;o__Erysipelotrichales;f__Erysipelotrichaceae;g__Turicibacter;
Bradyrhizobium	0	0.00050524	0	k__Bacteria;p__Proteobacteria;c__Alphaproteobacteria;o__Rhizobiales;f__Xanthobacteraceae;g__Bradyrhizobium;
Staphylococcus	0	0.00050524	0.000270245	k__Bacteria;p__Firmicutes;c__Bacilli;o__Staphylococcales;f__Staphylococcaceae;g__Staphylococcus;
Aurantisolimonas	0.000281995	0.00050524	0.000364243	k__Bacteria;p__Bacteroidota;c__Bacteroidia;o__Chitinophagales;f__Chitinophagaceae;g__Aurantisolimonas;
Corynebacterium	2.34996e-05	0.00050524	0	k__Bacteria;p__Actinobacteriota;c__Actinobacteria;o__Corynebacteriales;f__Corynebacteriaceae;g__Corynebacterium;
Roseomonas	0.000340744	0.000493491	0.000364243	k__Bacteria;p__Proteobacteria;c__Alphaproteobacteria;o__Acetobacterales;f__Acetobacteraceae;g__Roseomonas;
Dialister	0.000246745	0.000469991	0.000176247	k__Bacteria;p__Firmicutes;c__Negativicutes;o__Veillonellales-Selenomonadales;f__Veillonellaceae;g__Dialister;
RBG-13-54-9	0.000164497	0.000434742	0.000234996	k__Bacteria;p__Chloroflexi;c__Anaerolineae;o__RBG-13-54-9;f__RBG-13-54-9;g__RBG-13-54-9;
Gaiella	0	0.000434742	0	k__Bacteria;p__Actinobacteriota;c__Thermoleophilia;o__Gaiellales;f__Gaiellaceae;g__Gaiella;
Kapabacteriales	0.000129248	0.000434742	0.000105748	k__Bacteria;p__Bacteroidota;c__Kapabacteria;o__Kapabacteriales;f__Kapabacteriales;g__Kapabacteriales;
Candidatus_Solibacter	0	0.000434742	0	k__Bacteria;p__Acidobacteriota;c__Acidobacteriae;o__Solibacterales;f__Solibacteraceae;g__Candidatus_Solibacter;
Clostridia_UCG-014	0.000129248	0.000422992	8.22484e-05	k__Bacteria;p__Firmicutes;c__Clostridia;o__Clostridia_UCG-014;f__Clostridia_UCG-014;g__Clostridia_UCG-014;
Rheinheimera	0	0	0.000422992	k__Bacteria;p__Proteobacteria;c__Gammaproteobacteria;o__Alteromonadales;f__Alteromonadaceae;g__Rheinheimera;
Ruminococcus	0	0.000422992	0	k__Bacteria;p__Firmicutes;c__Clostridia;o__Oscillospirales;f__Ruminococcaceae;g__Ruminococcus;
Eubacterium_coprostanoligenes_group	0.000140997	0.000422992	7.04987e-05	k__Bacteria;p__Firmicutes;c__Clostridia;o__Oscillospirales;f__Eubacterium_coprostanoligenes_group;g__Eubacterium_coprostanoligenes_group;
Luteolibacter	0.000164497	0.000411242	7.04987e-05	k__Bacteria;p__Verrucomicrobiota;c__Verrucomicrobiae;o__Verrucomicrobiales;f__Rubritaleaceae;g__Luteolibacter;
Lachnospiraceae_NK4A136_group	5.87489e-05	0.000399492	8.22484e-05	k__Bacteria;p__Firmicutes;c__Clostridia;o__Lachnospirales;f__Lachnospiraceae;g__Lachnospiraceae_NK4A136_group;
Iamia	8.22484e-05	0.000387743	7.04987e-05	k__Bacteria;p__Actinobacteriota;c__Acidimicrobiia;o__Microtrichales;f__Iamiaceae;g__Iamia;
JG30-KF-CM45	8.22484e-05	0.000375993	8.22484e-05	k__Bacteria;p__Chloroflexi;c__Chloroflexia;o__Thermomicrobiales;f__JG30-KF-CM45;g__JG30-KF-CM45;
Solirubrobacter	0	0.000375993	0	k__Bacteria;p__Actinobacteriota;c__Thermoleophilia;o__Solirubrobacterales;f__Solirubrobacteraceae;g__Solirubrobacter;
Tyzzerella	0	0.000364243	4.69991e-05	k__Bacteria;p__Firmicutes;c__Clostridia;o__Lachnospirales;f__Lachnospiraceae;g__Tyzzerella;
Ruminococcus_torques_group	9.39982e-05	0.000352493	0	k__Bacteria;p__Firmicutes;c__Clostridia;o__Lachnospirales;f__Lachnospiraceae;g__Ruminococcus_torques_group;
Bacillus	0.000129248	0.000340744	0.000105748	k__Bacteria;p__Firmicutes;c__Bacilli;o__Bacillales;f__Bacillaceae;g__Bacillus;
Veillonella	0.000340744	0.000234996	7.04987e-05	k__Bacteria;p__Firmicutes;c__Negativicutes;o__Veillonellales-Selenomonadales;f__Veillonellaceae;g__Veillonella;
Pirellula	3.52493e-05	0.000328994	0.000129248	k__Bacteria;p__Planctomycetota;c__Planctomycetes;o__Pirellulales;f__Pirellulaceae;g__Pirellula;
Vicinamibacteraceae	0	0.000328994	0	k__Bacteria;p__Acidobacteriota;c__Vicinamibacteria;o__Vicinamibacterales;f__Vicinamibacteraceae;g__Vicinamibacteraceae;
Lactococcus	0.000129248	0.000328994	0.000211496	k__Bacteria;p__Firmicutes;c__Bacilli;o__Lactobacillales;f__Streptococcaceae;g__Lactococcus;
Methylobacterium-Methylorubrum	0.000317244	7.04987e-05	8.22484e-05	k__Bacteria;p__Proteobacteria;c__Alphaproteobacteria;o__Rhizobiales;f__Beijerinckiaceae;g__Methylobacterium-Methylorubrum;
Muribaculaceae	0	0.000317244	0.000187996	k__Bacteria;p__Bacteroidota;c__Bacteroidia;o__Bacteroidales;f__Muribaculaceae;g__Muribaculaceae;
Alistipes	4.69991e-05	0.000305494	0.000176247	k__Bacteria;p__Bacteroidota;c__Bacteroidia;o__Bacteroidales;f__Rikenellaceae;g__Alistipes;
Agathobacter	0	0.000305494	0	k__Bacteria;p__Firmicutes;c__Clostridia;o__Lachnospirales;f__Lachnospiraceae;g__Agathobacter;
Parasutterella	0.000129248	0.000305494	0.000105748	k__Bacteria;p__Proteobacteria;c__Gammaproteobacteria;o__Burkholderiales;f__Sutterellaceae;g__Parasutterella;
Hydrogenophaga	0.000199746	0.000293744	0.000164497	k__Bacteria;p__Proteobacteria;c__Gammaproteobacteria;o__Burkholderiales;f__Comamonadaceae;g__Hydrogenophaga;
Bosea	0.000117498	0.000293744	0.000199746	k__Bacteria;p__Proteobacteria;c__Alphaproteobacteria;o__Rhizobiales;f__Beijerinckiaceae;g__Bosea;
Proteus	0.000187996	0.000293744	9.39982e-05	k__Bacteria;p__Proteobacteria;c__Gammaproteobacteria;o__Enterobacterales;f__Morganellaceae;g__Proteus;
Dokdonella	0	0.000293744	0	k__Bacteria;p__Proteobacteria;c__Gammaproteobacteria;o__Xanthomonadales;f__Rhodanobacteraceae;g__Dokdonella;
IMCC26256	3.52493e-05	0.000281995	7.04987e-05	k__Bacteria;p__Actinobacteriota;c__Acidimicrobiia;o__IMCC26256;f__IMCC26256;g__IMCC26256;
Bauldia	0.000281995	0.000234996	0.000199746	k__Bacteria;p__Proteobacteria;c__Alphaproteobacteria;o__Rhizobiales;f__Rhizobiales_Incertae_Sedis;g__Bauldia;
Mucispirillum	0.000176247	0.000281995	4.69991e-05	k__Bacteria;p__Deferribacterota;c__Deferribacteres;o__Deferribacterales;f__Deferribacteraceae;g__Mucispirillum;
Nitrospira	3.52493e-05	0.000270245	0	k__Bacteria;p__Nitrospirota;c__Nitrospiria;o__Nitrospirales;f__Nitrospiraceae;g__Nitrospira;
Haliangium	0	0.000270245	0	k__Bacteria;p__Myxococcota;c__Polyangia;o__Haliangiales;f__Haliangiaceae;g__Haliangium;
A21b	0	0.000258495	0	k__Bacteria;p__Proteobacteria;c__Gammaproteobacteria;o__Burkholderiales;f__A21b;g__A21b;
Pajaroellobacter	0	0.000258495	0	k__Bacteria;p__Myxococcota;c__Polyangia;o__Polyangiales;f__Polyangiaceae;g__Pajaroellobacter;
Pseudoxanthomonas	0.000223246	0.000258495	0.000129248	k__Bacteria;p__Proteobacteria;c__Gammaproteobacteria;o__Xanthomonadales;f__Xanthomonadaceae;g__Pseudoxanthomonas;
Akkermansia	0.000140997	0.000258495	0	k__Bacteria;p__Verrucomicrobiota;c__Verrucomicrobiae;o__Verrucomicrobiales;f__Akkermansiaceae;g__Akkermansia;
IMCC26207	0	0.000246745	0	k__Bacteria;p__Actinobacteriota;c__Acidimicrobiia;o__Microtrichales;f__Microtrichaceae;g__IMCC26207;
SC-I-84	0	0.000234996	0	k__Bacteria;p__Proteobacteria;c__Gammaproteobacteria;o__Burkholderiales;f__SC-I-84;g__SC-I-84;
Pseudoalteromonas	2.34996e-05	0.000234996	0.000199746	k__Bacteria;p__Proteobacteria;c__Gammaproteobacteria;o__Alteromonadales;f__Pseudoalteromonadaceae;g__Pseudoalteromonas;
67-14	2.34996e-05	0.000234996	5.87489e-05	k__Bacteria;p__Actinobacteriota;c__Thermoleophilia;o__Solirubrobacterales;f__67-14;g__67-14;
Phascolarctobacterium	2.34996e-05	0.000223246	4.69991e-05	k__Bacteria;p__Firmicutes;c__Negativicutes;o__Acidaminococcales;f__Acidaminococcaceae;g__Phascolarctobacterium;
Neochlamydia	8.22484e-05	0.000223246	0.000117498	k__Bacteria;p__Verrucomicrobiota;c__Chlamydiae;o__Chlamydiales;f__Parachlamydiaceae;g__Neochlamydia;
Ellin6067	0	0.000223246	0	k__Bacteria;p__Proteobacteria;c__Gammaproteobacteria;o__Burkholderiales;f__Nitrosomonadaceae;g__Ellin6067;
Arthrobacter	0	0.000223246	0	k__Bacteria;p__Actinobacteriota;c__Actinobacteria;o__Micrococcales;f__Micrococcaceae;g__Arthrobacter;
Micrococcus	8.22484e-05	0.000211496	0.000117498	k__Bacteria;p__Actinobacteriota;c__Actinobacteria;o__Micrococcales;f__Micrococcaceae;g__Micrococcus;
UCG-002	0	0.000211496	0	k__Bacteria;p__Firmicutes;c__Clostridia;o__Oscillospirales;f__Oscillospiraceae;g__UCG-002;
Lachnoclostridium	0	0.000211496	0	k__Bacteria;p__Firmicutes;c__Clostridia;o__Lachnospirales;f__Lachnospiraceae;g__Lachnoclostridium;
Brevundimonas	0.000105748	0.000211496	8.22484e-05	k__Bacteria;p__Proteobacteria;c__Alphaproteobacteria;o__Caulobacterales;f__Caulobacteraceae;g__Brevundimonas;
Cellvibrio	8.22484e-05	0.000211496	7.04987e-05	k__Bacteria;p__Proteobacteria;c__Gammaproteobacteria;o__Cellvibrionales;f__Cellvibrionaceae;g__Cellvibrio;
Gemmatimonas	0	0.000211496	5.87489e-05	k__Bacteria;p__Gemmatimonadota;c__Gemmatimonadetes;o__Gemmatimonadales;f__Gemmatimonadaceae;g__Gemmatimonas;
Reyranella	9.39982e-05	0.000211496	9.39982e-05	k__Bacteria;p__Proteobacteria;c__Alphaproteobacteria;o__Reyranellales;f__Reyranellaceae;g__Reyranella;
Deefgea	8.22484e-05	0.000199746	0.000105748	k__Bacteria;p__Proteobacteria;c__Gammaproteobacteria;o__Burkholderiales;f__Chitinibacteraceae;g__Deefgea;
Saccharimonadales	7.04987e-05	0.000187996	4.69991e-05	k__Bacteria;p__Patescibacteria;c__Saccharimonadia;o__Saccharimonadales;f__Saccharimonadales;g__Saccharimonadales;
Fusicatenibacter	7.04987e-05	0.000187996	7.04987e-05	k__Bacteria;p__Firmicutes;c__Clostridia;o__Lachnospirales;f__Lachnospiraceae;g__Fusicatenibacter;
Conexibacter	0	0.000187996	0	k__Bacteria;p__Actinobacteriota;c__Thermoleophilia;o__Solirubrobacterales;f__Solirubrobacteraceae;g__Conexibacter;
Bryobacter	2.34996e-05	0.000176247	0	k__Bacteria;p__Acidobacteriota;c__Acidobacteriae;o__Bryobacterales;f__Bryobacteraceae;g__Bryobacter;
TRA3-20	0	0.000176247	0	k__Bacteria;p__Proteobacteria;c__Gammaproteobacteria;o__Burkholderiales;f__TRA3-20;g__TRA3-20;
Pseudarthrobacter	0	0.000176247	0	k__Bacteria;p__Actinobacteriota;c__Actinobacteria;o__Micrococcales;f__Micrococcaceae;g__Pseudarthrobacter;
MB-A2-108	0	0.000176247	0	k__Bacteria;p__Actinobacteriota;c__MB-A2-108;o__MB-A2-108;f__MB-A2-108;g__MB-A2-108;
Skermanella	0	0.000176247	0	k__Bacteria;p__Proteobacteria;c__Alphaproteobacteria;o__Azospirillales;f__Azospirillaceae;g__Skermanella;
Bdellovibrio	9.39982e-05	0.000176247	9.39982e-05	k__Bacteria;p__Bdellovibrionota;c__Bdellovibrionia;o__Bdellovibrionales;f__Bdellovibrionaceae;g__Bdellovibrio;
Devosia	2.34996e-05	0.000176247	3.52493e-05	k__Bacteria;p__Proteobacteria;c__Alphaproteobacteria;o__Rhizobiales;f__Devosiaceae;g__Devosia;
Roseisolibacter	0	0.000176247	0	k__Bacteria;p__Gemmatimonadota;c__Gemmatimonadetes;o__Gemmatimonadales;f__Gemmatimonadaceae;g__Roseisolibacter;
UCG-005	0.000129248	0.000176247	9.39982e-05	k__Bacteria;p__Firmicutes;c__Clostridia;o__Oscillospirales;f__Oscillospiraceae;g__UCG-005;
Faecalibaculum	7.04987e-05	0.000176247	0	k__Bacteria;p__Firmicutes;c__Bacilli;o__Erysipelotrichales;f__Erysipelotrichaceae;g__Faecalibaculum;
Acidibacter	0	0.000164497	0	k__Bacteria;p__Proteobacteria;c__Gammaproteobacteria;o__Gammaproteobacteria_Incertae_Sedis;f__Unknown_Family;g__Acidibacter;
Sutterella	0.000164497	0.000152747	0	k__Bacteria;p__Proteobacteria;c__Gammaproteobacteria;o__Burkholderiales;f__Sutterellaceae;g__Sutterella;
Ilumatobacter	0	0.000164497	0	k__Bacteria;p__Actinobacteriota;c__Acidimicrobiia;o__Microtrichales;f__Ilumatobacteraceae;g__Ilumatobacter;
Paracoccus	5.87489e-05	0.000152747	0.000164497	k__Bacteria;p__Proteobacteria;c__Alphaproteobacteria;o__Rhodobacterales;f__Rhodobacteraceae;g__Paracoccus;
Microvirga	0	0.000164497	0	k__Bacteria;p__Proteobacteria;c__Alphaproteobacteria;o__Rhizobiales;f__Beijerinckiaceae;g__Microvirga;
WD260	0	0.000152747	0	k__Bacteria;p__Proteobacteria;c__Gammaproteobacteria;o__WD260;f__WD260;g__WD260;
Subdoligranulum	0.000129248	0.000152747	9.39982e-05	k__Bacteria;p__Firmicutes;c__Clostridia;o__Oscillospirales;f__Ruminococcaceae;g__Subdoligranulum;
Lawsonella	0	0.000152747	1.17498e-05	k__Bacteria;p__Actinobacteriota;c__Actinobacteria;o__Corynebacteriales;f__Corynebacteriaceae;g__Lawsonella;
Actinobacillus	0	0.000152747	0	k__Bacteria;p__Proteobacteria;c__Gammaproteobacteria;o__Pasteurellales;f__Pasteurellaceae;g__Actinobacillus;
Anaerostipes	0	0.000152747	5.87489e-05	k__Bacteria;p__Firmicutes;c__Clostridia;o__Lachnospirales;f__Lachnospiraceae;g__Anaerostipes;
Variovorax	0	0.000140997	0	k__Bacteria;p__Proteobacteria;c__Gammaproteobacteria;o__Burkholderiales;f__Comamonadaceae;g__Variovorax;
Subgroup_22	0	0.000140997	0	k__Bacteria;p__Acidobacteriota;c__Subgroup_22;o__Subgroup_22;f__Subgroup_22;g__Subgroup_22;
PLTA13	0	0.000140997	0	k__Bacteria;p__Proteobacteria;c__Gammaproteobacteria;o__PLTA13;f__PLTA13;g__PLTA13;
Cetobacterium	0.000140997	0	8.22484e-05	k__Bacteria;p__Fusobacteriota;c__Fusobacteriia;o__Fusobacteriales;f__Fusobacteriaceae;g__Cetobacterium;
Massilia	0	0.000140997	0	k__Bacteria;p__Proteobacteria;c__Gammaproteobacteria;o__Burkholderiales;f__Oxalobacteraceae;g__Massilia;
Citrobacter	0	0.000129248	0	k__Bacteria;p__Proteobacteria;c__Gammaproteobacteria;o__Enterobacterales;f__Enterobacteriaceae;g__Citrobacter;
Rhodanobacter	0	0.000129248	0	k__Bacteria;p__Proteobacteria;c__Gammaproteobacteria;o__Xanthomonadales;f__Rhodanobacteraceae;g__Rhodanobacter;
Puia	0	0.000129248	0	k__Bacteria;p__Bacteroidota;c__Bacteroidia;o__Chitinophagales;f__Chitinophagaceae;g__Puia;
Granulicella	0	0.000129248	0	k__Bacteria;p__Acidobacteriota;c__Acidobacteriae;o__Acidobacteriales;f__Acidobacteriaceae_(Subgroup_1);g__Granulicella;
Coprococcus	5.87489e-05	0.000129248	5.87489e-05	k__Bacteria;p__Firmicutes;c__Clostridia;o__Lachnospirales;f__Lachnospiraceae;g__Coprococcus;
Uruburuella	0	5.87489e-05	0.000129248	k__Bacteria;p__Proteobacteria;c__Gammaproteobacteria;o__Burkholderiales;f__Neisseriaceae;g__Uruburuella;
OM60(NOR5)_clade	0	0.000129248	0	k__Bacteria;p__Proteobacteria;c__Gammaproteobacteria;o__Cellvibrionales;f__Halieaceae;g__OM60(NOR5)_clade;
NK4A214_group	0	0.000129248	0	k__Bacteria;p__Firmicutes;c__Clostridia;o__Oscillospirales;f__Oscillospiraceae;g__NK4A214_group;
Lysobacter	0	0.000129248	0	k__Bacteria;p__Proteobacteria;c__Gammaproteobacteria;o__Xanthomonadales;f__Xanthomonadaceae;g__Lysobacter;
Dubosiella	3.52493e-05	0.000117498	0.000105748	k__Bacteria;p__Firmicutes;c__Bacilli;o__Erysipelotrichales;f__Erysipelotrichaceae;g__Dubosiella;
Pelagibacterium	0	0.000117498	0	k__Bacteria;p__Proteobacteria;c__Alphaproteobacteria;o__Rhizobiales;f__Devosiaceae;g__Pelagibacterium;
Candidatus_Udaeobacter	0	0.000117498	0	k__Bacteria;p__Verrucomicrobiota;c__Verrucomicrobiae;o__Chthoniobacterales;f__Chthoniobacteraceae;g__Candidatus_Udaeobacter;
Roseiarcus	0	0.000117498	0	k__Bacteria;p__Proteobacteria;c__Alphaproteobacteria;o__Rhizobiales;f__Beijerinckiaceae;g__Roseiarcus;
Pleomorphomonas	0	0.000117498	0	k__Bacteria;p__Proteobacteria;c__Alphaproteobacteria;o__Rhizobiales;f__Pleomorphomonadaceae;g__Pleomorphomonas;
Aquabacterium	0	0.000117498	0	k__Bacteria;p__Proteobacteria;c__Gammaproteobacteria;o__Burkholderiales;f__Comamonadaceae;g__Aquabacterium;
Lachnospira	7.04987e-05	0.000117498	0	k__Bacteria;p__Firmicutes;c__Clostridia;o__Lachnospirales;f__Lachnospiraceae;g__Lachnospira;
Candidatus_Koribacter	0	0.000117498	0	k__Bacteria;p__Acidobacteriota;c__Acidobacteriae;o__Acidobacteriales;f__Koribacteraceae;g__Candidatus_Koribacter;
Tundrisphaera	0	0.000117498	9.39982e-05	k__Bacteria;p__Planctomycetota;c__Planctomycetes;o__Isosphaerales;f__Isosphaeraceae;g__Tundrisphaera;
Catenibacterium	0.000117498	9.39982e-05	2.34996e-05	k__Bacteria;p__Firmicutes;c__Bacilli;o__Erysipelotrichales;f__Erysipelatoclostridiaceae;g__Catenibacterium;
Intestinibacter	0	0.000117498	0	k__Bacteria;p__Firmicutes;c__Clostridia;o__Peptostreptococcales-Tissierellales;f__Peptostreptococcaceae;g__Intestinibacter;
Butyricicoccus	0	0.000117498	0	k__Bacteria;p__Firmicutes;c__Clostridia;o__Oscillospirales;f__Butyricicoccaceae;g__Butyricicoccus;
GOUTA6	0	0.000105748	0	k__Bacteria;p__Proteobacteria;c__Gammaproteobacteria;o__Burkholderiales;f__Nitrosomonadaceae;g__GOUTA6;
Weissella	7.04987e-05	0.000105748	0	k__Bacteria;p__Firmicutes;c__Bacilli;o__Lactobacillales;f__Leuconostocaceae;g__Weissella;
Acidothermus	0	0.000105748	0	k__Bacteria;p__Actinobacteriota;c__Actinobacteria;o__Frankiales;f__Acidothermaceae;g__Acidothermus;
CAG-352	0.000105748	0	5.87489e-05	k__Bacteria;p__Firmicutes;c__Clostridia;o__Oscillospirales;f__Ruminococcaceae;g__CAG-352;
Neisseria	0	0.000105748	0	k__Bacteria;p__Proteobacteria;c__Gammaproteobacteria;o__Burkholderiales;f__Neisseriaceae;g__Neisseria;
Occallatibacter	0	9.39982e-05	0	k__Bacteria;p__Acidobacteriota;c__Acidobacteriae;o__Acidobacteriales;f__Acidobacteriaceae_(Subgroup_1);g__Occallatibacter;
ZOR0006	4.69991e-05	9.39982e-05	0	k__Bacteria;p__Firmicutes;c__Bacilli;o__Erysipelotrichales;f__Erysipelotrichaceae;g__ZOR0006;
Kytococcus	0	9.39982e-05	0	k__Bacteria;p__Actinobacteriota;c__Actinobacteria;o__Micrococcales;f__Dermacoccaceae;g__Kytococcus;
Pedomicrobium	9.39982e-05	0	5.87489e-05	k__Bacteria;p__Proteobacteria;c__Alphaproteobacteria;o__Rhizobiales;f__Hyphomicrobiaceae;g__Pedomicrobium;
Rhodobacter	0	0	9.39982e-05	k__Bacteria;p__Proteobacteria;c__Alphaproteobacteria;o__Rhodobacterales;f__Rhodobacteraceae;g__Rhodobacter;
Phaselicystis	0	9.39982e-05	0	k__Bacteria;p__Myxococcota;c__Polyangia;o__Polyangiales;f__Phaselicystidaceae;g__Phaselicystis;
Rubellimicrobium	0	9.39982e-05	0	k__Bacteria;p__Proteobacteria;c__Alphaproteobacteria;o__Rhodobacterales;f__Rhodobacteraceae;g__Rubellimicrobium;
KF-JG30-C25	0	9.39982e-05	0	k__Bacteria;p__Proteobacteria;c__Gammaproteobacteria;o__KF-JG30-C25;f__KF-JG30-C25;g__KF-JG30-C25;
Megamonas	0	9.39982e-05	0	k__Bacteria;p__Firmicutes;c__Negativicutes;o__Veillonellales-Selenomonadales;f__Selenomonadaceae;g__Megamonas;
Eubacterium_hallii_group	0	9.39982e-05	0	k__Bacteria;p__Firmicutes;c__Clostridia;o__Lachnospirales;f__Lachnospiraceae;g__Eubacterium_hallii_group;
Allisonella	5.87489e-05	9.39982e-05	3.52493e-05	k__Bacteria;p__Firmicutes;c__Negativicutes;o__Veillonellales-Selenomonadales;f__Veillonellaceae;g__Allisonella;
Atopostipes	0	9.39982e-05	0	k__Bacteria;p__Firmicutes;c__Bacilli;o__Lactobacillales;f__Carnobacteriaceae;g__Atopostipes;
Mycobacterium	0	9.39982e-05	0	k__Bacteria;p__Actinobacteriota;c__Actinobacteria;o__Corynebacteriales;f__Mycobacteriaceae;g__Mycobacterium;
Peptoclostridium	0	9.39982e-05	0	k__Bacteria;p__Firmicutes;c__Clostridia;o__Peptostreptococcales-Tissierellales;f__Peptostreptococcaceae;g__Peptoclostridium;
Methyloversatilis	7.04987e-05	9.39982e-05	7.04987e-05	k__Bacteria;p__Proteobacteria;c__Gammaproteobacteria;o__Burkholderiales;f__Rhodocyclaceae;g__Methyloversatilis;
Chloroplast	0	9.39982e-05	0	k__Bacteria;p__Cyanobacteria;c__Cyanobacteriia;o__Chloroplast;f__Chloroplast;g__Chloroplast;
Kosakonia	0	9.39982e-05	0	k__Bacteria;p__Proteobacteria;c__Gammaproteobacteria;o__Enterobacterales;f__Enterobacteriaceae;g__Kosakonia;
Cupriavidus	1.17498e-05	0	9.39982e-05	k__Bacteria;p__Proteobacteria;c__Gammaproteobacteria;o__Burkholderiales;f__Burkholderiaceae;g__Cupriavidus;
Fimbriiglobus	0	9.39982e-05	0	k__Bacteria;p__Planctomycetota;c__Planctomycetes;o__Gemmatales;f__Gemmataceae;g__Fimbriiglobus;
Steroidobacteraceae	0	9.39982e-05	0	k__Bacteria;p__Proteobacteria;c__Gammaproteobacteria;o__Steroidobacterales;f__Steroidobacteraceae;g__Steroidobacteraceae;
Holdemanella	0	9.39982e-05	0	k__Bacteria;p__Firmicutes;c__Bacilli;o__Erysipelotrichales;f__Erysipelotrichaceae;g__Holdemanella;
Intestinimonas	0	8.22484e-05	0	k__Bacteria;p__Firmicutes;c__Clostridia;o__Oscillospirales;f__Oscillospiraceae;g__Intestinimonas;
Woeseia	0	8.22484e-05	0	k__Bacteria;p__Proteobacteria;c__Gammaproteobacteria;o__Steroidobacterales;f__Woeseiaceae;g__Woeseia;
Candidatus_Alysiosphaera	0	8.22484e-05	0	k__Bacteria;p__Proteobacteria;c__Alphaproteobacteria;o__Tistrellales;f__Geminicoccaceae;g__Candidatus_Alysiosphaera;
Altererythrobacter	8.22484e-05	8.22484e-05	5.87489e-05	k__Bacteria;p__Proteobacteria;c__Alphaproteobacteria;o__Sphingomonadales;f__Sphingomonadaceae;g__Altererythrobacter;
Desulfovibrio	0	8.22484e-05	0	k__Bacteria;p__Desulfobacterota;c__Desulfovibrionia;o__Desulfovibrionales;f__Desulfovibrionaceae;g__Desulfovibrio;
Aquimonas	3.52493e-05	8.22484e-05	0	k__Bacteria;p__Proteobacteria;c__Gammaproteobacteria;o__Xanthomonadales;f__Rhodanobacteraceae;g__Aquimonas;
Berkelbacteria	2.34996e-05	4.69991e-05	8.22484e-05	k__Bacteria;p__Patescibacteria;c__Berkelbacteria;o__Berkelbacteria;f__Berkelbacteria;g__Berkelbacteria;
Burkholderia-Caballeronia-Paraburkholderia	0	8.22484e-05	0	k__Bacteria;p__Proteobacteria;c__Gammaproteobacteria;o__Burkholderiales;f__Burkholderiaceae;g__Burkholderia-Caballeronia-Paraburkholderia;
Gemmata	2.34996e-05	8.22484e-05	7.04987e-05	k__Bacteria;p__Planctomycetota;c__Planctomycetes;o__Gemmatales;f__Gemmataceae;g__Gemmata;
Alishewanella	0	0	8.22484e-05	k__Bacteria;p__Proteobacteria;c__Gammaproteobacteria;o__Alteromonadales;f__Alteromonadaceae;g__Alishewanella;
AD3	0	8.22484e-05	0	k__Bacteria;p__Chloroflexi;c__AD3;o__AD3;f__AD3;g__AD3;
Nakamurella	0	8.22484e-05	0	k__Bacteria;p__Actinobacteriota;c__Actinobacteria;o__Frankiales;f__Nakamurellaceae;g__Nakamurella;
Nordella	0	8.22484e-05	3.52493e-05	k__Bacteria;p__Proteobacteria;c__Alphaproteobacteria;o__Rhizobiales;f__Rhizobiales_Incertae_Sedis;g__Nordella;
Anaeromyxobacter	0	8.22484e-05	0	k__Bacteria;p__Myxococcota;c__Myxococcia;o__Myxococcales;f__Anaeromyxobacteraceae;g__Anaeromyxobacter;
SWB02	1.17498e-05	8.22484e-05	2.34996e-05	k__Bacteria;p__Proteobacteria;c__Alphaproteobacteria;o__Caulobacterales;f__Hyphomonadaceae;g__SWB02;
Barnesiella	0	8.22484e-05	4.69991e-05	k__Bacteria;p__Bacteroidota;c__Bacteroidia;o__Bacteroidales;f__Barnesiellaceae;g__Barnesiella;
Eubacterium_eligens_group	0	0	7.04987e-05	k__Bacteria;p__Firmicutes;c__Clostridia;o__Lachnospirales;f__Lachnospiraceae;g__Eubacterium_eligens_group;
Georgenia	0	7.04987e-05	0	k__Bacteria;p__Actinobacteriota;c__Actinobacteria;o__Micrococcales;f__Bogoriellaceae;g__Georgenia;
Rokubacteriales	0	7.04987e-05	0	k__Bacteria;p__Methylomirabilota;c__Methylomirabilia;o__Rokubacteriales;f__Rokubacteriales;g__Rokubacteriales;
Ruminococcaceae	0	0	7.04987e-05	k__Bacteria;p__Firmicutes;c__Clostridia;o__Oscillospirales;f__Ruminococcaceae;g__Ruminococcaceae;
Aridibacter	0	7.04987e-05	0	k__Bacteria;p__Acidobacteriota;c__Blastocatellia;o__Blastocatellales;f__Blastocatellaceae;g__Aridibacter;
Psychrobacter	0	0	7.04987e-05	k__Bacteria;p__Proteobacteria;c__Gammaproteobacteria;o__Pseudomonadales;f__Moraxellaceae;g__Psychrobacter;
Gardnerella	0	7.04987e-05	0	k__Bacteria;p__Actinobacteriota;c__Actinobacteria;o__Bifidobacteriales;f__Bifidobacteriaceae;g__Gardnerella;
Plesiomonas	0	0	7.04987e-05	k__Bacteria;p__Proteobacteria;c__Gammaproteobacteria;o__Enterobacterales;f__Enterobacteriaceae;g__Plesiomonas;
Methyloligellaceae	0	7.04987e-05	0	k__Bacteria;p__Proteobacteria;c__Alphaproteobacteria;o__Rhizobiales;f__Methyloligellaceae;g__Methyloligellaceae;
Ruminococcus_gnavus_group	7.04987e-05	5.87489e-05	0	k__Bacteria;p__Firmicutes;c__Clostridia;o__Lachnospirales;f__Lachnospiraceae;g__Ruminococcus_gnavus_group;
RB41	0	7.04987e-05	0	k__Bacteria;p__Acidobacteriota;c__Blastocatellia;o__Pyrinomonadales;f__Pyrinomonadaceae;g__RB41;
Erysipelotrichaceae_UCG-003	0	7.04987e-05	3.52493e-05	k__Bacteria;p__Firmicutes;c__Bacilli;o__Erysipelotrichales;f__Erysipelatoclostridiaceae;g__Erysipelotrichaceae_UCG-003;
Allorhizobium-Neorhizobium-Pararhizobium-Rhizobium	7.04987e-05	0	0	k__Bacteria;p__Proteobacteria;c__Alphaproteobacteria;o__Rhizobiales;f__Rhizobiaceae;g__Allorhizobium-Neorhizobium-Pararhizobium-Rhizobium;
Dongia	0	7.04987e-05	0	k__Bacteria;p__Proteobacteria;c__Alphaproteobacteria;o__Dongiales;f__Dongiaceae;g__Dongia;
Enhydrobacter	0	7.04987e-05	0	k__Bacteria;p__Proteobacteria;c__Gammaproteobacteria;o__Pseudomonadales;f__Moraxellaceae;g__Enhydrobacter;
Pseudohongiella	4.69991e-05	7.04987e-05	3.52493e-05	k__Bacteria;p__Proteobacteria;c__Gammaproteobacteria;o__Oceanospirillales;f__Pseudohongiellaceae;g__Pseudohongiella;
Legionella	3.52493e-05	7.04987e-05	3.52493e-05	k__Bacteria;p__Proteobacteria;c__Gammaproteobacteria;o__Legionellales;f__Legionellaceae;g__Legionella;
MBNT15	0	7.04987e-05	0	k__Bacteria;p__MBNT15;c__MBNT15;o__MBNT15;f__MBNT15;g__MBNT15;
Halomonas	0	7.04987e-05	0	k__Bacteria;p__Proteobacteria;c__Gammaproteobacteria;o__Oceanospirillales;f__Halomonadaceae;g__Halomonas;
Stella	0	7.04987e-05	0	k__Bacteria;p__Proteobacteria;c__Alphaproteobacteria;o__Azospirillales;f__Azospirillales_Incertae_Sedis;g__Stella;
Chthonobacter	0	5.87489e-05	0	k__Bacteria;p__Proteobacteria;c__Alphaproteobacteria;o__Rhizobiales;f__Pleomorphomonadaceae;g__Chthonobacter;
Pediococcus	0	5.87489e-05	0	k__Bacteria;p__Firmicutes;c__Bacilli;o__Lactobacillales;f__Lactobacillaceae;g__Pediococcus;
A4b	0	5.87489e-05	0	k__Bacteria;p__Chloroflexi;c__Anaerolineae;o__SBR1031;f__A4b;g__A4b;
Subgroup_17	0	5.87489e-05	0	k__Bacteria;p__Acidobacteriota;c__Vicinamibacteria;o__Subgroup_17;f__Subgroup_17;g__Subgroup_17;
Agromyces	0	5.87489e-05	0	k__Bacteria;p__Actinobacteriota;c__Actinobacteria;o__Micrococcales;f__Microbacteriaceae;g__Agromyces;
WPS-2	0	5.87489e-05	0	k__Bacteria;p__WPS-2;c__WPS-2;o__WPS-2;f__WPS-2;g__WPS-2;
Arenimonas	0	5.87489e-05	0	k__Bacteria;p__Proteobacteria;c__Gammaproteobacteria;o__Xanthomonadales;f__Xanthomonadaceae;g__Arenimonas;
Leuconostoc	3.52493e-05	5.87489e-05	0	k__Bacteria;p__Firmicutes;c__Bacilli;o__Lactobacillales;f__Leuconostocaceae;g__Leuconostoc;
Eubacterium_ventriosum_group	4.69991e-05	0	0	k__Bacteria;p__Firmicutes;c__Clostridia;o__Lachnospirales;f__Lachnospiraceae;g__Eubacterium_ventriosum_group;
Flavobacterium	2.34996e-05	0	4.69991e-05	k__Bacteria;p__Bacteroidota;c__Bacteroidia;o__Flavobacteriales;f__Flavobacteriaceae;g__Flavobacterium;
KCM-B-112	0	4.69991e-05	0	k__Bacteria;p__Proteobacteria;c__Gammaproteobacteria;o__Acidithiobacillales;f__Acidithiobacillaceae;g__KCM-B-112;
Sporosarcina	0	4.69991e-05	0	k__Bacteria;p__Firmicutes;c__Bacilli;o__Bacillales;f__Planococcaceae;g__Sporosarcina;
Anaerosporobacter	4.69991e-05	0	0	k__Bacteria;p__Firmicutes;c__Clostridia;o__Lachnospirales;f__Lachnospiraceae;g__Anaerosporobacter;
Entotheonellaceae	0	4.69991e-05	0	k__Bacteria;p__Entotheonellaeota;c__Entotheonellia;o__Entotheonellales;f__Entotheonellaceae;g__Entotheonellaceae;
SH3-11	0	4.69991e-05	3.52493e-05	k__Bacteria;p__Verrucomicrobiota;c__Verrucomicrobiae;o__Pedosphaerales;f__Pedosphaeraceae;g__SH3-11;
NB1-j	0	4.69991e-05	0	k__Bacteria;p__NB1-j;c__NB1-j;o__NB1-j;f__NB1-j;g__NB1-j;
BIrii41	0	4.69991e-05	0	k__Bacteria;p__Myxococcota;c__Polyangia;o__Polyangiales;f__BIrii41;g__BIrii41;
Eubacterium_xylanophilum_group	0	0	4.69991e-05	k__Bacteria;p__Firmicutes;c__Clostridia;o__Lachnospirales;f__Lachnospiraceae;g__Eubacterium_xylanophilum_group;
Subgroup_7	0	4.69991e-05	0	k__Bacteria;p__Acidobacteriota;c__Holophagae;o__Subgroup_7;f__Subgroup_7;g__Subgroup_7;
Ketobacter	4.69991e-05	0	0	k__Bacteria;p__Proteobacteria;c__Gammaproteobacteria;o__Oceanospirillales;f__Alcanivoracaceae;g__Ketobacter;
mle1-7	0	0	4.69991e-05	k__Bacteria;p__Proteobacteria;c__Gammaproteobacteria;o__Burkholderiales;f__Nitrosomonadaceae;g__mle1-7;
Ignavibacterium	0	4.69991e-05	0	k__Bacteria;p__Bacteroidota;c__Ignavibacteria;o__Ignavibacteriales;f__Ignavibacteriaceae;g__Ignavibacterium;
Methylocapsa	0	4.69991e-05	0	k__Bacteria;p__Proteobacteria;c__Alphaproteobacteria;o__Rhizobiales;f__Beijerinckiaceae;g__Methylocapsa;
Phreatobacter	2.34996e-05	4.69991e-05	0	k__Bacteria;p__Proteobacteria;c__Alphaproteobacteria;o__Rhizobiales;f__Rhizobiales_Incertae_Sedis;g__Phreatobacter;
GCA-900066575	3.52493e-05	0	0	k__Bacteria;p__Firmicutes;c__Clostridia;o__Lachnospirales;f__Lachnospiraceae;g__GCA-900066575;
Monoglobus	3.52493e-05	0	0	k__Bacteria;p__Firmicutes;c__Clostridia;o__Monoglobales;f__Monoglobaceae;g__Monoglobus;
UCG-003	0	0	3.52493e-05	k__Bacteria;p__Firmicutes;c__Clostridia;o__Oscillospirales;f__Oscillospiraceae;g__UCG-003;
Elstera	0	0	3.52493e-05	k__Bacteria;p__Proteobacteria;c__Alphaproteobacteria;o__Elsterales;f__Elsteraceae;g__Elstera;
Novosphingobium	0	0	3.52493e-05	k__Bacteria;p__Proteobacteria;c__Alphaproteobacteria;o__Sphingomonadales;f__Sphingomonadaceae;g__Novosphingobium;
Rubritaleaceae	2.34996e-05	0	2.34996e-05	k__Bacteria;p__Verrucomicrobiota;c__Verrucomicrobiae;o__Verrucomicrobiales;f__Rubritaleaceae;g__Rubritaleaceae;
Others	0.0180359	0.0341566	0.182239	Others

## Sheet: species
Taxonomy	KKL	PY	CDM	Tax_detail
Enterobacteriaceae_bacterium	0.0120905	0.306798	0.267225	k__Bacteria;p__Proteobacteria;c__Gammaproteobacteria;o__Orbales;f__Orbaceae;g__Gilliamella;s__Enterobacteriaceae_bacterium;
Bifidobacterium_asteroides	0.00270245	0.0344151	0.149469	k__Bacteria;p__Actinobacteriota;c__Actinobacteria;o__Bifidobacteriales;f__Bifidobacteriaceae;g__Bifidobacterium;s__Bifidobacterium_asteroides;
Apis_florea	0.00150397	0.0291629	0.0765733	k__Bacteria;p__Firmicutes;c__Bacilli;o__Lactobacillales;f__Lactobacillaceae;g__Lactobacillus;s__Apis_florea;
Bifidobacterium_sp.	0.000187996	0.000234996	0.0167317	k__Bacteria;p__Actinobacteriota;c__Actinobacteria;o__Bifidobacteriales;f__Bifidobacteriaceae;g__Bifidobacterium;s__Bifidobacterium_sp.;
Bifidobacterium_indicum	0.000152747	0.000234996	0.0110095	k__Bacteria;p__Actinobacteriota;c__Actinobacteria;o__Bifidobacteriales;f__Bifidobacteriaceae;g__Bifidobacterium;s__Bifidobacterium_indicum;
Clostridium_baratii	0.00460591	0.00857734	0.00317244	k__Bacteria;p__Firmicutes;c__Clostridia;o__Clostridiales;f__Clostridiaceae;g__Clostridium_sensu_stricto_1;s__Clostridium_baratii;
Lactobacillus_melliventris	0.000117498	0.00847159	0.000129248	k__Bacteria;p__Firmicutes;c__Bacilli;o__Lactobacillales;f__Lactobacillaceae;g__Lactobacillus;s__Lactobacillus_melliventris;
Lactobacillus_kunkeei	0.000270245	0.00104573	0.00688537	k__Bacteria;p__Firmicutes;c__Bacilli;o__Lactobacillales;f__Lactobacillaceae;g__Lactobacillus;s__Lactobacillus_kunkeei;
Megasphaera_elsdenii	0.000317244	0.00232646	0.000834234	k__Bacteria;p__Firmicutes;c__Negativicutes;o__Veillonellales-Selenomonadales;f__Veillonellaceae;g__Megasphaera;s__Megasphaera_elsdenii;
Lactobacillus_mellis	0.000223246	0.000364243	0.00128073	k__Bacteria;p__Firmicutes;c__Bacilli;o__Lactobacillales;f__Lactobacillaceae;g__Lactobacillus;s__Lactobacillus_mellis;
Lactobacillus_mucosae	4.69991e-05	0.00124548	0.000422992	k__Bacteria;p__Firmicutes;c__Bacilli;o__Lactobacillales;f__Lactobacillaceae;g__Lactobacillus;s__Lactobacillus_mucosae;
Lactobacillus_fermentum	0.000105748	0.000728486	0.000140997	k__Bacteria;p__Firmicutes;c__Bacilli;o__Lactobacillales;f__Lactobacillaceae;g__Lactobacillus;s__Lactobacillus_fermentum;
Roseburia_inulinivorans	0.000234996	0.000716736	0.000176247	k__Bacteria;p__Firmicutes;c__Clostridia;o__Lachnospirales;f__Lachnospiraceae;g__Roseburia;s__Roseburia_inulinivorans;
Prevotella_copri	0	0.000704987	9.39982e-05	k__Bacteria;p__Bacteroidota;c__Bacteroidia;o__Bacteroidales;f__Prevotellaceae;g__Prevotella;s__Prevotella_copri;
Lactobacillus_iners	0	0.000681487	0	k__Bacteria;p__Firmicutes;c__Bacilli;o__Lactobacillales;f__Lactobacillaceae;g__Lactobacillus;s__Lactobacillus_iners;
Cenchrus_americanus	0	0	0.000422992	k__Bacteria;p__Proteobacteria;c__Gammaproteobacteria;o__Alteromonadales;f__Alteromonadaceae;g__Rheinheimera;s__Cenchrus_americanus;
Dialister_sp.	0.000246745	0.000399492	0.000176247	k__Bacteria;p__Firmicutes;c__Negativicutes;o__Veillonellales-Selenomonadales;f__Veillonellaceae;g__Dialister;s__Dialister_sp.;
Alsobacter_sp.	0.000117498	0.000328994	0.000164497	k__Bacteria;p__Proteobacteria;c__Alphaproteobacteria;o__Rhizobiales;f__Beijerinckiaceae;g__alphaI_cluster;s__Alsobacter_sp.;
Bifidobacterium_longum	8.22484e-05	0.000293744	0	k__Bacteria;p__Actinobacteriota;c__Actinobacteria;o__Bifidobacteriales;f__Bifidobacteriaceae;g__Bifidobacterium;s__Bifidobacterium_longum;
Mucispirillum_schaedleri	0.000176247	0.000281995	4.69991e-05	k__Bacteria;p__Deferribacterota;c__Deferribacteres;o__Deferribacterales;f__Deferribacteraceae;g__Mucispirillum;s__Mucispirillum_schaedleri;
Vibrio_diazotrophicus	0	0.000234996	0.000140997	k__Bacteria;p__Proteobacteria;c__Gammaproteobacteria;o__Vibrionales;f__Vibrionaceae;g__Vibrio;s__Vibrio_diazotrophicus;
Alistipes_putredinis	0	0.000223246	8.22484e-05	k__Bacteria;p__Bacteroidota;c__Bacteroidia;o__Bacteroidales;f__Rikenellaceae;g__Alistipes;s__Alistipes_putredinis;
Acinetobacter_indicus	7.04987e-05	0.000199746	8.22484e-05	k__Bacteria;p__Proteobacteria;c__Gammaproteobacteria;o__Pseudomonadales;f__Moraxellaceae;g__Acinetobacter;s__Acinetobacter_indicus;
Acinetobacter_guillouiae	0	0.000187996	0	k__Bacteria;p__Proteobacteria;c__Gammaproteobacteria;o__Pseudomonadales;f__Moraxellaceae;g__Acinetobacter;s__Acinetobacter_guillouiae;
Bacteroides_plebeius	0	0.000176247	0	k__Bacteria;p__Bacteroidota;c__Bacteroidia;o__Bacteroidales;f__Bacteroidaceae;g__Bacteroides;s__Bacteroides_plebeius;
bacterium_enrichment	3.52493e-05	0.000176247	0.000129248	k__Bacteria;p__Planctomycetota;c__Planctomycetes;o__Pirellulales;f__Pirellulaceae;g__Pirellula;s__bacterium_enrichment;
myxobacterium_AT3-03	0	0.000164497	0	k__Bacteria;p__Myxococcota;c__Polyangia;o__Haliangiales;f__Haliangiaceae;g__Haliangium;s__myxobacterium_AT3-03;
Corynebacterium_tuberculostearicum	2.34996e-05	0.000164497	0	k__Bacteria;p__Actinobacteriota;c__Actinobacteria;o__Corynebacteriales;f__Corynebacteriaceae;g__Corynebacterium;s__Corynebacterium_tuberculostearicum;
Prevotella_stercorea	0	0.000152747	0	k__Bacteria;p__Bacteroidota;c__Bacteroidia;o__Bacteroidales;f__Prevotellaceae;g__Prevotella;s__Prevotella_stercorea;
Bacteroides_stercoris	0	0.000152747	0	k__Bacteria;p__Bacteroidota;c__Bacteroidia;o__Bacteroidales;f__Bacteroidaceae;g__Bacteroides;s__Bacteroides_stercoris;
Lactobacillus_gasseri	0	0.000152747	2.34996e-05	k__Bacteria;p__Firmicutes;c__Bacilli;o__Lactobacillales;f__Lactobacillaceae;g__Lactobacillus;s__Lactobacillus_gasseri;
Actinobacillus_porcinus	0	0.000152747	0	k__Bacteria;p__Proteobacteria;c__Gammaproteobacteria;o__Pasteurellales;f__Pasteurellaceae;g__Actinobacillus;s__Actinobacillus_porcinus;
bacterium_Ellin7509	0	0.000140997	0	k__Bacteria;p__Acidobacteriota;c__Acidobacteriae;o__Subgroup_2;f__Subgroup_2;g__Subgroup_2;s__bacterium_Ellin7509;
Corynebacterium_confusum	0	0.000129248	0	k__Bacteria;p__Actinobacteriota;c__Actinobacteria;o__Corynebacteriales;f__Corynebacteriaceae;g__Corynebacterium;s__Corynebacterium_confusum;
Neisseria_sp.	0	5.87489e-05	0.000129248	k__Bacteria;p__Proteobacteria;c__Gammaproteobacteria;o__Burkholderiales;f__Neisseriaceae;g__Uruburuella;s__Neisseria_sp.;
Lachnospiraceae_bacterium	0	0.000129248	0	k__Bacteria;p__Firmicutes;c__Clostridia;o__Lachnospirales;f__Lachnospiraceae;g__Blautia;s__Lachnospiraceae_bacterium;
Bacteroides_massiliensis	5.87489e-05	0.000129248	0	k__Bacteria;p__Bacteroidota;c__Bacteroidia;o__Bacteroidales;f__Bacteroidaceae;g__Bacteroides;s__Bacteroides_massiliensis;
Sutterella_wadsworthensis	0.000129248	7.04987e-05	0	k__Bacteria;p__Proteobacteria;c__Gammaproteobacteria;o__Burkholderiales;f__Sutterellaceae;g__Sutterella;s__Sutterella_wadsworthensis;
Stenotrophomonas_rhizophila	0.000117498	4.69991e-05	8.22484e-05	k__Bacteria;p__Proteobacteria;c__Gammaproteobacteria;o__Xanthomonadales;f__Xanthomonadaceae;g__Stenotrophomonas;s__Stenotrophomonas_rhizophila;
Lactobacillus_apinorum	0	0	0.000117498	k__Bacteria;p__Firmicutes;c__Bacilli;o__Lactobacillales;f__Lactobacillaceae;g__Lactobacillus;s__Lactobacillus_apinorum;
Roseisolibacter_agri	0	0.000105748	0	k__Bacteria;p__Gemmatimonadota;c__Gemmatimonadetes;o__Gemmatimonadales;f__Gemmatimonadaceae;g__Roseisolibacter;s__Roseisolibacter_agri;
Rhodospirillaceae_bacterium	0	0.000105748	0	k__Bacteria;p__Proteobacteria;c__Alphaproteobacteria;s__Rhodospirillaceae_bacterium;
Hyphomicrobium_vulgare	0	0.000105748	0	k__Bacteria;p__Proteobacteria;c__Alphaproteobacteria;o__Rhizobiales;f__Hyphomicrobiaceae;g__Hyphomicrobium;s__Hyphomicrobium_vulgare;
Ruminococcus_bicirculans	0	9.39982e-05	0	k__Bacteria;p__Firmicutes;c__Clostridia;o__Oscillospirales;f__Ruminococcaceae;g__Ruminococcus;s__Ruminococcus_bicirculans;
Cupriavidus_pauculus	1.17498e-05	0	9.39982e-05	k__Bacteria;p__Proteobacteria;c__Gammaproteobacteria;o__Burkholderiales;f__Burkholderiaceae;g__Cupriavidus;s__Cupriavidus_pauculus;
bacterium_Ellin6515	0	9.39982e-05	0	k__Bacteria;p__Actinobacteriota;c__Thermoleophilia;o__Gaiellales;s__bacterium_Ellin6515;
Bacteroides_caccae	0	9.39982e-05	0	k__Bacteria;p__Bacteroidota;c__Bacteroidia;o__Bacteroidales;f__Bacteroidaceae;g__Bacteroides;s__Bacteroides_caccae;
Desulfovibrio_legallii	0	8.22484e-05	0	k__Bacteria;p__Desulfobacterota;c__Desulfovibrionia;o__Desulfovibrionales;f__Desulfovibrionaceae;g__Desulfovibrio;s__Desulfovibrio_legallii;
Solirubrobacterales_bacterium	2.34996e-05	8.22484e-05	0	k__Bacteria;p__Actinobacteriota;c__Thermoleophilia;o__Solirubrobacterales;f__67-14;g__67-14;s__Solirubrobacterales_bacterium;
bacterium_ic1277	0	8.22484e-05	0	k__Bacteria;p__Firmicutes;c__Clostridia;o__Oscillospirales;f__Ruminococcaceae;g__Ruminococcus;s__bacterium_ic1277;
Gardnerella_vaginalis	0	7.04987e-05	0	k__Bacteria;p__Actinobacteriota;c__Actinobacteria;o__Bifidobacteriales;f__Bifidobacteriaceae;g__Gardnerella;s__Gardnerella_vaginalis;
mouse_gut	0	0	7.04987e-05	k__Bacteria;p__Bacteroidota;c__Bacteroidia;o__Bacteroidales;f__Muribaculaceae;g__Muribaculaceae;s__mouse_gut;
delta_proteobacterium	0	7.04987e-05	0	k__Bacteria;p__MBNT15;c__MBNT15;o__MBNT15;f__MBNT15;g__MBNT15;s__delta_proteobacterium;
Bifidobacterium_pseudolongum	0	0	7.04987e-05	k__Bacteria;p__Actinobacteriota;c__Actinobacteria;o__Bifidobacteriales;f__Bifidobacteriaceae;g__Bifidobacterium;s__Bifidobacterium_pseudolongum;
Hyphomicrobium_zavarzinii	7.04987e-05	7.04987e-05	0	k__Bacteria;p__Proteobacteria;c__Alphaproteobacteria;o__Rhizobiales;f__Hyphomicrobiaceae;g__Hyphomicrobium;s__Hyphomicrobium_zavarzinii;
Nitrospira_defluvii	3.52493e-05	7.04987e-05	0	k__Bacteria;p__Nitrospirota;c__Nitrospiria;o__Nitrospirales;f__Nitrospiraceae;g__Nitrospira;s__Nitrospira_defluvii;
Georgenia_sp.	0	7.04987e-05	0	k__Bacteria;p__Actinobacteriota;c__Actinobacteria;o__Micrococcales;f__Bogoriellaceae;g__Georgenia;s__Georgenia_sp.;
Betaproteobacteria_bacterium	4.69991e-05	7.04987e-05	3.52493e-05	k__Bacteria;p__Proteobacteria;c__Gammaproteobacteria;o__Oceanospirillales;f__Pseudohongiellaceae;g__Pseudohongiella;s__Betaproteobacteria_bacterium;
bacterium_YRD2003	0	5.87489e-05	0	k__Bacteria;p__Firmicutes;c__Clostridia;o__Oscillospirales;f__Ruminococcaceae;g__Ruminococcus;s__bacterium_YRD2003;
Bacteroides_graminisolvens	0	5.87489e-05	0	k__Bacteria;p__Bacteroidota;c__Bacteroidia;o__Bacteroidales;f__Bacteroidaceae;g__Bacteroides;s__Bacteroides_graminisolvens;
Nitrospira_bacterium	0	5.87489e-05	0	k__Bacteria;p__Nitrospirota;c__Nitrospiria;o__Nitrospirales;f__Nitrospiraceae;g__Nitrospira;s__Nitrospira_bacterium;
Roseburia_intestinalis	5.87489e-05	0	0	k__Bacteria;p__Firmicutes;c__Clostridia;o__Lachnospirales;f__Lachnospiraceae;g__Roseburia;s__Roseburia_intestinalis;
Acidobacteria_bacterium	0	5.87489e-05	0	k__Bacteria;p__Acidobacteriota;c__Acidobacteriae;o__Acidobacteriales;f__Acidobacteriaceae_(Subgroup_1);s__Acidobacteria_bacterium;
planctomycete_str.	0	5.87489e-05	0	k__Bacteria;p__Planctomycetota;c__Planctomycetes;o__Pirellulales;f__Pirellulaceae;g__Pirellula;s__planctomycete_str.;
actinobacterium_WWH12	0	5.87489e-05	0	k__Bacteria;p__Actinobacteriota;c__Thermoleophilia;o__Gaiellales;f__Gaiellaceae;g__Gaiella;s__actinobacterium_WWH12;
Corynebacterium_amycolatum	0	5.87489e-05	0	k__Bacteria;p__Actinobacteriota;c__Actinobacteria;o__Corynebacteriales;f__Corynebacteriaceae;g__Corynebacterium;s__Corynebacterium_amycolatum;
Lysobacter_sp.	0	5.87489e-05	0	k__Bacteria;p__Proteobacteria;c__Gammaproteobacteria;o__Xanthomonadales;f__Xanthomonadaceae;g__Lysobacter;s__Lysobacter_sp.;
Coprococcus_comes	5.87489e-05	0	3.52493e-05	k__Bacteria;p__Firmicutes;c__Clostridia;o__Lachnospirales;f__Lachnospiraceae;g__Coprococcus;s__Coprococcus_comes;
Aquihabitans_daechungensis	4.69991e-05	0	0	k__Bacteria;p__Actinobacteriota;c__Acidimicrobiia;o__Microtrichales;f__Iamiaceae;g__Iamia;s__Aquihabitans_daechungensis;
Flavobacterium_filum	2.34996e-05	0	4.69991e-05	k__Bacteria;p__Bacteroidota;c__Bacteroidia;o__Flavobacteriales;f__Flavobacteriaceae;g__Flavobacterium;s__Flavobacterium_filum;
Bacteroides_coprocola	0	4.69991e-05	0	k__Bacteria;p__Bacteroidota;c__Bacteroidia;o__Bacteroidales;f__Bacteroidaceae;g__Bacteroides;s__Bacteroides_coprocola;
Pseudoxanthomonas_mexicana	3.52493e-05	0	0	k__Bacteria;p__Proteobacteria;c__Gammaproteobacteria;o__Xanthomonadales;f__Xanthomonadaceae;g__Pseudoxanthomonas;s__Pseudoxanthomonas_mexicana;
Others	0.975972	0.598357	0.463905	Others

## Sheet: ASV
#OTU ID	KKL	PY	CDM	Taxonomy
ASV0	0.629236	0.00857734	0.00513465	k__Bacteria; p__Proteobacteria; c__Gammaproteobacteria; o__Xanthomonadales; f__Xanthomonadaceae; g__Stenotrophomonas
ASV1	0.00434742	0.112093	0.265087	k__Bacteria; p__Proteobacteria; c__Gammaproteobacteria; o__Orbales; f__Orbaceae; g__Gilliamella; s__Enterobacteriaceae_bacterium
ASV2	0.183767	0.00229121	0.00191521	k__Bacteria; p__Proteobacteria; c__Gammaproteobacteria; o__Xanthomonadales; f__Xanthomonadaceae; g__Stenotrophomonas
ASV3	0.00398317	0.245805	0	k__Bacteria; p__Bacteroidota; c__Bacteroidia; o__Flavobacteriales; f__Weeksellaceae; g__Apibacter
ASV4	0.0105043	0.00551065	0.167517	k__Bacteria; p__Proteobacteria; c__Alphaproteobacteria; o__Rhizobiales; f__Rhizobiaceae
ASV5	0.00270245	0.0344151	0.149469	k__Bacteria; p__Actinobacteriota; c__Actinobacteria; o__Bifidobacteriales; f__Bifidobacteriaceae; g__Bifidobacterium; s__Bifidobacterium_asteroides
ASV6	0.00753161	0.150691	0.00213846	k__Bacteria; p__Proteobacteria; c__Gammaproteobacteria; o__Orbales; f__Orbaceae; g__Gilliamella; s__Enterobacteriaceae_bacterium
ASV7	0	0.00206796	0.101072	k__Bacteria; p__Bacteroidota; c__Bacteroidia; o__Flavobacteriales; f__Weeksellaceae; g__Apibacter
ASV8	0.0231353	0.063625	0.0126428	k__Bacteria; p__Proteobacteria; c__Gammaproteobacteria; o__Orbales; f__Orbaceae; g__Gilliamella; s__
ASV9	0.00957607	0.0853269	0.000928232	k__Bacteria; p__Proteobacteria; c__Gammaproteobacteria; o__Orbales; f__Orbaceae; g__Gilliamella; s__
ASV10	0.0613808	0.00300794	0.00307844	k__Bacteria; p__Proteobacteria; c__Gammaproteobacteria; o__Burkholderiales; f__Neisseriaceae; g__Snodgrassella
ASV11	0.00131597	0.0639423	0.000845984	k__Bacteria; p__Proteobacteria; c__Gammaproteobacteria; o__Burkholderiales; f__Neisseriaceae; g__Snodgrassella
ASV12	0.000986981	0.00158622	0.039115	k__Bacteria; p__Proteobacteria; c__Gammaproteobacteria; o__Orbales; f__Orbaceae; g__Gilliamella; s__
ASV13	0.00110448	0.000998731	0.0357781	k__Bacteria; p__Bacteroidota; c__Bacteroidia; o__Bacteroidales; f__Dysgonomonadaceae; g__Dysgonomonas; s__
ASV14	0	0.0440147	0	k__Bacteria; p__Proteobacteria; c__Gammaproteobacteria; o__Orbales; f__Orbaceae; g__Gilliamella; s__Enterobacteriaceae_bacterium
ASV15	0.00112798	0.00554589	0.0242633	k__Bacteria; p__Firmicutes; c__Bacilli; o__Lactobacillales; f__Lactobacillaceae; g__Lactobacillus; s__Apis_florea
ASV16	0.000375993	0.00884758	0.0176364	k__Bacteria; p__Firmicutes; c__Bacilli; o__Lactobacillales; f__Lactobacillaceae; g__Lactobacillus; s__Apis_florea
ASV17	0	0.000751986	0.0222423	k__Bacteria; p__Firmicutes; c__Bacilli; o__Lactobacillales; f__Lactobacillaceae; g__Lactobacillus; s__Apis_florea
ASV18	0	0	0.0199159	k__Bacteria; p__Bacteroidota; c__Bacteroidia; o__Bacteroidales; f__Dysgonomonadaceae; g__Dysgonomonas; s__
ASV19	0.000822484	0.000904733	0.0155802	k__Bacteria; p__Proteobacteria; c__Gammaproteobacteria; o__Burkholderiales; f__Neisseriaceae; g__Snodgrassella
ASV20	0.000187996	0.000234996	0.0167317	k__Bacteria; p__Actinobacteriota; c__Actinobacteria; o__Bifidobacteriales; f__Bifidobacteriaceae; g__Bifidobacterium; s__Bifidobacterium_sp.
ASV21	0.00881233	0.000798985	0.00477041	k__Bacteria; p__Proteobacteria; c__Gammaproteobacteria; o__Burkholderiales; f__Neisseriaceae; g__Snodgrassella
ASV22	0.00401842	0.00732011	0.00284345	k__Bacteria; p__Firmicutes; c__Clostridia; o__Clostridiales; f__Clostridiaceae; g__Clostridium_sensu_stricto_1; s__Clostridium_baratii
ASV23	0	0.00054049	0.0124313	k__Bacteria; p__Firmicutes; c__Bacilli; o__Lactobacillales; f__Lactobacillaceae; g__Lactobacillus; s__Apis_florea
ASV24	0.000152747	0.000234996	0.0110095	k__Bacteria; p__Actinobacteriota; c__Actinobacteria; o__Bifidobacteriales; f__Bifidobacteriaceae; g__Bifidobacterium; s__Bifidobacterium_indicum
ASV25	0.00404192	0.00614513	0.00185646	k__Bacteria; p__Firmicutes; c__Bacilli; o__Lactobacillales; f__Lactobacillaceae; g__Lactobacillus
ASV26	0	0.0102576	0	k__Bacteria; p__Firmicutes; c__Bacilli; o__Lactobacillales; f__Lactobacillaceae; g__Lactobacillus; s__Apis_florea
ASV27	0.000117498	0.00847159	0.000129248	k__Bacteria; p__Firmicutes; c__Bacilli; o__Lactobacillales; f__Lactobacillaceae; g__Lactobacillus; s__Lactobacillus_melliventris
ASV28	0.00192696	0.00373643	0.00144522	k__Bacteria; p__Firmicutes; c__Bacilli; o__Lactobacillales; f__Enterococcaceae; g__Enterococcus
ASV29	0.000305494	0.00055224	0.00522865	k__Bacteria; p__Proteobacteria; c__Alphaproteobacteria; o__Acetobacterales; f__Acetobacteraceae; g__Bombella
ASV30	0.000270245	0.000610988	0.00445317	k__Bacteria; p__Firmicutes; c__Bacilli; o__Lactobacillales; f__Lactobacillaceae; g__Lactobacillus; s__Lactobacillus_kunkeei
ASV31	0.00130423	0.00309019	0.00133947	k__Bacteria; p__Firmicutes; c__Clostridia; o__Peptostreptococcales-Tissierellales; f__Peptostreptococcaceae; g__Romboutsia
ASV32	0.00139822	0.00326644	0.00109273	k__Bacteria; p__Firmicutes; c__Bacilli; o__Lactobacillales; f__Enterococcaceae; g__Enterococcus
ASV33	0.00176247	0.00306669	0.000775485	k__Bacteria; p__Proteobacteria; c__Gammaproteobacteria; o__Enterobacterales; f__Enterobacteriaceae; g__Escherichia-Shigella
ASV34	0	0	0.00441792	k__Bacteria; p__Proteobacteria; c__Alphaproteobacteria; o__Rhizobiales; f__Rhizobiaceae
ASV35	0.00113973	0.00224421	0.00140997	k__Bacteria; p__Proteobacteria; c__Gammaproteobacteria; o__Pseudomonadales; f__Pseudomonadaceae; g__Pseudomonas
ASV36	0.000845984	0.00207971	0.00125723	k__Bacteria; p__Proteobacteria; c__Alphaproteobacteria; o__Rhodobacterales; f__Rhodobacteraceae
ASV37	0.000575739	0.00172722	0.000904733	k__Bacteria; p__Actinobacteriota; c__Actinobacteria; o__Micrococcales; f__Microbacteriaceae; g__Microbacterium
ASV38	0.000164497	0.000469991	0.00192696	k__Bacteria; p__Proteobacteria; c__Gammaproteobacteria; o__Enterobacterales; f__Enterobacteriaceae
ASV39	0	0.00321944	0	k__Bacteria; p__Firmicutes; c__Bacilli; o__Lactobacillales; f__Lactobacillaceae; g__Lactobacillus; s__Apis_florea
ASV40	0	0.000434742	0.00206796	k__Bacteria; p__Firmicutes; c__Bacilli; o__Lactobacillales; f__Lactobacillaceae; g__Lactobacillus; s__Lactobacillus_kunkeei
ASV41	0.00051699	0.00105748	0.000881233	k__Bacteria; p__Proteobacteria; c__Alphaproteobacteria; o__Rhodobacterales; f__Rhodobacteraceae; g__Gemmobacter
ASV42	0.000187996	0.000258495	0.00176247	k__Bacteria; p__Proteobacteria; c__Gammaproteobacteria; o__Enterobacterales; f__Erwiniaceae; g__Pantoea
ASV43	0.00055224	0.000939982	0.000798985	k__Bacteria; p__Proteobacteria; c__Gammaproteobacteria; o__Pseudomonadales; f__Pseudomonadaceae; g__Pseudomonas
ASV44	0.000317244	0.00139822	0.000657987	k__Bacteria; p__Firmicutes; c__Negativicutes; o__Veillonellales-Selenomonadales; f__Veillonellaceae; g__Megasphaera; s__Megasphaera_elsdenii
ASV45	0.000211496	0.00172722	0.000469991	k__Bacteria; p__Firmicutes; c__Bacilli; o__Lactobacillales; f__Streptococcaceae; g__Streptococcus
ASV46	0.000375993	0.00137472	0.00050524	k__Bacteria; p__Actinobacteriota; c__Actinobacteria; o__Bifidobacteriales; f__Bifidobacteriaceae; g__Bifidobacterium
ASV47	0.000587489	0.00125723	0.000328994	k__Bacteria; p__Firmicutes; c__Clostridia; o__Clostridiales; f__Clostridiaceae; g__Clostridium_sensu_stricto_1; s__Clostridium_baratii
ASV48	0.000587489	0.000834234	0.000622738	k__Bacteria; p__Proteobacteria; c__Gammaproteobacteria; o__Pseudomonadales; f__Pseudomonadaceae; g__Pseudomonas
ASV49	0.000563989	0.000751986	0.000610988	k__Bacteria; p__Proteobacteria; c__Alphaproteobacteria; o__Sphingomonadales; f__Sphingomonadaceae; g__Sphingomonas
ASV50	4.69991e-05	0.000176247	0.00159797	k__Bacteria; p__Proteobacteria; c__Alphaproteobacteria; o__Acetobacterales; f__Acetobacteraceae; g__Bombella
ASV51	0.000469991	0.00103398	0.000434742	k__Bacteria; p__Proteobacteria; c__Gammaproteobacteria; o__Enterobacterales; f__Enterobacteriaceae
ASV52	0.000364243	0.000963482	0.000575739	k__Bacteria; p__Proteobacteria; c__Gammaproteobacteria; o__Burkholderiales; f__Burkholderiaceae; g__Ralstonia
ASV53	0.000270245	0.000975231	0.00054049	k__Bacteria; p__Proteobacteria; c__Gammaproteobacteria; o__Enterobacterales; f__Yersiniaceae; g__Serratia
ASV54	0	0.000364243	0.00128073	k__Bacteria; p__Firmicutes; c__Bacilli; o__Lactobacillales; f__Lactobacillaceae; g__Lactobacillus; s__Lactobacillus_mellis
ASV55	0.000563989	0.000728486	0.000352493	k__Bacteria; p__Proteobacteria; c__Gammaproteobacteria; o__Pseudomonadales; f__Pseudomonadaceae; g__Pseudomonas
ASV56	0.000152747	0.000317244	0.00111623	k__Bacteria; p__Proteobacteria; c__Gammaproteobacteria; o__Burkholderiales; f__Chromobacteriaceae; g__Vogesella
ASV57	0.000610988	0.000834234	0.000199746	k__Bacteria; p__Actinobacteriota; c__Coriobacteriia; o__Coriobacteriales; f__Coriobacteriaceae; g__Collinsella
ASV58	0.000328994	0.000857734	0.000458241	k__Bacteria; p__Firmicutes; c__Clostridia; o__Oscillospirales; f__Ruminococcaceae; g__Faecalibacterium
ASV59	0.000493491	0.000751986	0.000305494	k__Bacteria; p__Proteobacteria; c__Gammaproteobacteria; o__Pseudomonadales; f__Pseudomonadaceae; g__Pseudomonas
ASV60	0.000411242	0.000728486	0.000317244	k__Bacteria; p__Proteobacteria; c__Alphaproteobacteria; o__Rhodobacterales; f__Rhodobacteraceae
ASV61	0.000493491	0.000587489	0.000364243	k__Bacteria; p__Proteobacteria; c__Gammaproteobacteria; o__Enterobacterales; f__Enterobacteriaceae
ASV62	0.000446492	0.00102223	0	k__Bacteria; p__Firmicutes; c__Bacilli; o__Lactobacillales; f__Lactobacillaceae; g__Lactobacillus
ASV63	0.000258495	0.000834234	0.000281995	k__Bacteria; p__Verrucomicrobiota; c__Verrucomicrobiae; o__Verrucomicrobiales; f__DEV007; g__DEV007; s__
ASV64	0.000105748	0.000129248	0.000986981	k__Bacteria; p__Proteobacteria; c__Gammaproteobacteria; o__Aeromonadales; f__Aeromonadaceae; g__Aeromonas
ASV65	4.69991e-05	0.000857734	0.000422992	k__Bacteria; p__Firmicutes; c__Bacilli; o__Lactobacillales; f__Lactobacillaceae; g__Lactobacillus; s__Lactobacillus_mucosae
ASV66	0	0.00123373	0.000199746	k__Bacteria; p__Bacteroidota; c__Bacteroidia; o__Bacteroidales; f__Bacteroidaceae; g__Bacteroides
ASV67	0.000281995	0.00050524	0.000364243	k__Bacteria; p__Bacteroidota; c__Bacteroidia; o__Chitinophagales; f__Chitinophagaceae; g__Aurantisolimonas; s__
ASV68	0.000234996	0.00106923	0	k__Bacteria; p__Firmicutes; c__Clostridia; o__Oscillospirales; f__Ruminococcaceae; g__Faecalibacterium
ASV69	0.000904733	0	0	k__Bacteria
ASV70	0.000234996	0.000716736	0.000176247	k__Bacteria; p__Firmicutes; c__Clostridia; o__Lachnospirales; f__Lachnospiraceae; g__Roseburia; s__Roseburia_inulinivorans
ASV71	0.000446492	0.000646238	0	k__Bacteria; p__Firmicutes; c__Bacilli; o__Lactobacillales; f__Lactobacillaceae; g__Lactobacillus
ASV72	0	0	0.000951732	k__Bacteria; p__Proteobacteria; c__Gammaproteobacteria; o__Enterobacterales; f__Enterobacteriaceae
ASV73	0.000199746	0.000446492	0.000387743	k__Bacteria; p__Proteobacteria; c__Gammaproteobacteria; o__Enterobacterales; f__Yersiniaceae; g__Serratia
ASV74	0	0.000223246	0.000751986	k__Bacteria; p__Proteobacteria; c__Gammaproteobacteria; o__Enterobacterales; f__Enterobacteriaceae; g__Enterobacter
ASV75	0.000810735	0	0	k__Bacteria; p__Proteobacteria; c__Gammaproteobacteria; o__Xanthomonadales; f__Xanthomonadaceae; g__Stenotrophomonas
ASV76	0.000258495	0.00054049	0.000211496	k__Bacteria; p__Firmicutes; c__Bacilli; o__Erysipelotrichales; f__Erysipelotrichaceae; g__Turicibacter; s__
ASV77	0.000787235	0	0	k__Bacteria; p__Proteobacteria; c__Gammaproteobacteria; o__Xanthomonadales; f__Xanthomonadaceae; g__Stenotrophomonas
ASV78	0.000152747	0.000751986	0.000140997	k__Bacteria; p__Actinobacteriota; c__Actinobacteria; o__Bifidobacteriales; f__Bifidobacteriaceae; g__Bifidobacterium
ASV79	0.000293744	0.000458241	0.000199746	k__Bacteria; p__Proteobacteria; c__Alphaproteobacteria; o__Rhizobiales; f__Rhizobiales_Incertae_Sedis; g__; s__
ASV80	0.000258495	0.000340744	0.000305494	k__Bacteria; p__Proteobacteria; c__Alphaproteobacteria; o__Rhizobiales; f__Hyphomicrobiaceae; g__Hyphomicrobium
ASV81	0.000458241	0.000469991	0	k__Bacteria; p__Verrucomicrobiota; c__Verrucomicrobiae; o__Verrucomicrobiales; f__Verrucomicrobiaceae; g__; s__
ASV82	0	0	0.000834234	k__Bacteria; p__Proteobacteria; c__Gammaproteobacteria; o__Enterobacterales; f__Erwiniaceae; g__Pantoea
ASV83	0.000105748	0.000728486	0.000140997	k__Bacteria; p__Firmicutes; c__Bacilli; o__Lactobacillales; f__Lactobacillaceae; g__Lactobacillus; s__Lactobacillus_fermentum
ASV84	9.39982e-05	0.000187996	0.00054049	k__Bacteria; p__Proteobacteria; c__Gammaproteobacteria; o__Enterobacterales; f__Enterobacteriaceae; g__Klebsiella
ASV85	0.000281995	0.000281995	0.000258495	k__Bacteria; p__Proteobacteria; c__Alphaproteobacteria; o__Acetobacterales; f__Acetobacteraceae; g__Roseomonas
ASV86	4.69991e-05	0.000822484	8.22484e-05	k__Bacteria; p__Actinobacteriota; c__Actinobacteria; o__Propionibacteriales; f__Propionibacteriaceae; g__Cutibacterium
ASV87	0.000246745	0.000399492	0.000176247	k__Bacteria; p__Firmicutes; c__Negativicutes; o__Veillonellales-Selenomonadales; f__Veillonellaceae; g__Dialister; s__Dialister_sp.
ASV88	0.000164497	0.000434742	0.000234996	k__Bacteria; p__Chloroflexi; c__Anaerolineae; o__RBG-13-54-9; f__RBG-13-54-9; g__RBG-13-54-9
ASV89	0.000187996	0.000493491	0.000152747	k__Bacteria; p__Firmicutes; c__Negativicutes; o__Veillonellales-Selenomonadales; f__Selenomonadaceae; g__Mitsuokella; s__
ASV90	0.000152747	0.000458241	0.000223246	k__Bacteria; p__Proteobacteria; c__Alphaproteobacteria; o__Rhizobiales; f__Xanthobacteraceae; g__Pseudorhodoplanes; s__
ASV91	0.000281995	0.000270245	0.000211496	k__Bacteria; p__Proteobacteria; c__Alphaproteobacteria; o__Rhizobiales; f__Rhizobiaceae
ASV92	0.000646238	0	0	k__Bacteria; p__Proteobacteria; c__Alphaproteobacteria; o__Sphingomonadales; f__Sphingomonadaceae; g__Sphingomonas
ASV93	0.000199746	0.000328994	0.000187996	k__Bacteria; p__Proteobacteria; c__Alphaproteobacteria; o__Rhizobiales; f__Beijerinckiaceae; g__alphaI_cluster; s__
ASV94	0.000340744	0.000234996	7.04987e-05	k__Bacteria; p__Firmicutes; c__Negativicutes; o__Veillonellales-Selenomonadales; f__Veillonellaceae; g__Veillonella
ASV95	8.22484e-05	0.00054049	0.000129248	k__Bacteria; p__Firmicutes; c__Clostridia; o__Lachnospirales; f__Lachnospiraceae; g__Blautia
ASV96	0.000199746	0.000293744	0.000176247	k__Bacteria; p__Firmicutes; c__Bacilli; o__Lactobacillales; f__Lactobacillaceae; g__Lactobacillus
ASV97	0.000164497	0.000364243	0.000164497	k__Bacteria; p__Proteobacteria; c__Gammaproteobacteria; o__Enterobacterales; f__Yersiniaceae; g__Serratia
ASV98	0.000223246	0.000258495	0.000199746	k__Bacteria; p__Proteobacteria; c__Gammaproteobacteria; o__Enterobacterales; f__Enterobacteriaceae
ASV99	0.000117498	0.000469991	0.000152747	k__Bacteria; p__Firmicutes; c__Clostridia; o__Oscillospirales; f__Ruminococcaceae; g__Faecalibacterium
ASV100	0.000129248	0.000328994	0.000211496	k__Bacteria; p__Firmicutes; c__Bacilli; o__Lactobacillales; f__Streptococcaceae; g__Lactococcus
ASV101	0.000129248	0.000434742	0.000105748	k__Bacteria; p__Bacteroidota; c__Kapabacteria; o__Kapabacteriales; f__Kapabacteriales; g__Kapabacteriales; s__
ASV102	0.000117498	0.000399492	0.000140997	k__Bacteria; p__Firmicutes; c__Negativicutes; o__Veillonellales-Selenomonadales; f__Veillonellaceae; g__Megasphaera
ASV103	0.000211496	0.000234996	0.000152747	k__Bacteria; p__Proteobacteria; c__Alphaproteobacteria; o__Rhizobiales; f__Rhizobiales_Incertae_Sedis; g__Bauldia; s__
ASV104	0.000129248	0.000375993	0.000140997	k__Bacteria; p__Firmicutes; c__Bacilli; o__Lactobacillales; f__Lactobacillaceae; g__Lactobacillus
ASV105	0.00050524	0	0	k__Bacteria; p__Proteobacteria; c__Gammaproteobacteria; o__Orbales; f__Orbaceae; g__Gilliamella
ASV106	0	0.000622738	9.39982e-05	k__Bacteria; p__Bacteroidota; c__Bacteroidia; o__Bacteroidales; f__Prevotellaceae; g__Prevotella; s__Prevotella_copri
ASV107	0.000117498	0.000328994	0.000164497	k__Bacteria; p__Proteobacteria; c__Alphaproteobacteria; o__Rhizobiales; f__Beijerinckiaceae; g__alphaI_cluster; s__Alsobacter_sp.
ASV108	0	0.000493491	0.000176247	k__Bacteria; p__Firmicutes; c__Negativicutes; o__Veillonellales-Selenomonadales; f__Veillonellaceae; g__Megasphaera; s__Megasphaera_elsdenii
ASV109	0	0.000469991	0.000176247	k__Bacteria; p__Verrucomicrobiota; c__Verrucomicrobiae; o__Verrucomicrobiales; f__Verrucomicrobiaceae; g__; s__
ASV110	0.000105748	0.000270245	0.000211496	k__Bacteria; p__Firmicutes; c__Bacilli; o__Lactobacillales; f__Lactobacillaceae; g__Lactobacillus
ASV111	0	0.000364243	0.000258495	k__Bacteria; p__Proteobacteria; c__Gammaproteobacteria; o__Vibrionales; f__Vibrionaceae; g__Vibrio
ASV112	0.000117498	0.000293744	0.000199746	k__Bacteria; p__Proteobacteria; c__Alphaproteobacteria; o__Rhizobiales; f__Beijerinckiaceae; g__Bosea
ASV113	0.000187996	0.000293744	9.39982e-05	k__Bacteria; p__Proteobacteria; c__Gammaproteobacteria; o__Enterobacterales; f__Morganellaceae; g__Proteus
ASV114	0	0.000716736	0	k__Bacteria; p__Proteobacteria; c__Alphaproteobacteria; o__Acetobacterales; f__Acetobacteraceae; g__Bombella
ASV115	0	0.000740236	0	k__Bacteria; p__Firmicutes; c__Bacilli; o__Lactobacillales; f__Enterococcaceae; g__Enterococcus
ASV116	0	0.000340744	0.000281995	k__Bacteria; p__Proteobacteria; c__Gammaproteobacteria; o__Vibrionales; f__Vibrionaceae; g__Vibrio
ASV117	0	0.000681487	0	k__Bacteria; p__Firmicutes; c__Bacilli; o__Lactobacillales; f__Lactobacillaceae; g__Lactobacillus; s__Lactobacillus_iners
ASV118	0.000187996	0.000199746	0.000129248	k__Bacteria; p__Proteobacteria; c__Gammaproteobacteria; o__Xanthomonadales; f__Xanthomonadaceae; g__Pseudoxanthomonas
ASV119	9.39982e-05	0.000317244	0.000140997	k__Bacteria; p__Bdellovibrionota; c__Oligoflexia; o__Oligoflexales; f__; g__; s__
ASV120	0.000434742	0	0	k__Bacteria; p__Proteobacteria; c__Gammaproteobacteria; o__Orbales; f__Orbaceae; g__Gilliamella; s__
ASV121	8.22484e-05	0.000375993	8.22484e-05	k__Bacteria; p__Chloroflexi; c__Chloroflexia; o__Thermomicrobiales; f__JG30-KF-CM45; g__JG30-KF-CM45; s__
ASV122	0.000176247	0.000281995	4.69991e-05	k__Bacteria; p__Deferribacterota; c__Deferribacteres; o__Deferribacterales; f__Deferribacteraceae; g__Mucispirillum; s__Mucispirillum_schaedleri
ASV123	0.000152747	0.000152747	0.000140997	k__Bacteria; p__Proteobacteria; c__Gammaproteobacteria; o__Enterobacterales; f__Enterobacteriaceae
ASV124	0	0	0.000434742	k__Bacteria; p__Proteobacteria; c__Gammaproteobacteria; o__Pseudomonadales; f__Moraxellaceae; g__Acinetobacter
ASV125	0.000117498	0.000199746	0.000164497	k__Bacteria; p__Proteobacteria; c__Gammaproteobacteria; o__Burkholderiales; f__Comamonadaceae; g__Hydrogenophaga
ASV126	0.000293744	7.04987e-05	5.87489e-05	k__Bacteria; p__Proteobacteria; c__Alphaproteobacteria; o__Rhizobiales; f__Beijerinckiaceae; g__Methylobacterium-Methylorubrum
ASV127	0	0	0.000422992	k__Bacteria; p__Proteobacteria; c__Gammaproteobacteria; o__Alteromonadales; f__Alteromonadaceae; g__Rheinheimera; s__Cenchrus_americanus
ASV128	0	0.000469991	7.04987e-05	k__Bacteria; p__Bacteroidota; c__Bacteroidia; o__Bacteroidales; f__Bacteroidaceae; g__Bacteroides
ASV129	5.87489e-05	0.000340744	8.22484e-05	k__Bacteria; p__Firmicutes; c__Clostridia; o__Lachnospirales; f__Lachnospiraceae; g__Lachnospiraceae_NK4A136_group
ASV130	0.000140997	0.000223246	7.04987e-05	k__Bacteria; p__Firmicutes; c__Clostridia; o__Oscillospirales; f__Eubacterium_coprostanoligenes_group; g__Eubacterium_coprostanoligenes_group; s__
ASV131	8.22484e-05	0.000293744	7.04987e-05	k__Bacteria; p__Verrucomicrobiota; c__Verrucomicrobiae; o__Verrucomicrobiales; f__Rubritaleaceae; g__Luteolibacter
ASV132	0.000211496	0.000199746	0	k__Bacteria; p__Firmicutes; c__Bacilli; o__Lactobacillales; f__Enterococcaceae; g__Enterococcus
ASV133	0.000340744	0	0	k__Bacteria; p__Proteobacteria; c__Gammaproteobacteria; o__Orbales; f__Orbaceae; g__Gilliamella; s__
ASV134	9.39982e-05	0.000187996	0.000140997	k__Bacteria; p__Proteobacteria; c__Alphaproteobacteria; o__Rhizobiales; f__Xanthobacteraceae; g__Pseudorhodoplanes; s__
ASV135	0	0.00050524	0	k__Bacteria; p__Proteobacteria; c__Gammaproteobacteria; o__Pseudomonadales; f__Moraxellaceae; g__Acinetobacter
ASV136	0.000129248	0.000152747	0.000105748	k__Bacteria; p__Firmicutes; c__Bacilli; o__Bacillales; f__Bacillaceae; g__Bacillus
ASV137	8.22484e-05	0.000223246	0.000117498	k__Bacteria; p__Verrucomicrobiota; c__Chlamydiae; o__Chlamydiales; f__Parachlamydiaceae; g__Neochlamydia; s__
ASV138	0.000140997	0.000258495	0	k__Bacteria; p__Verrucomicrobiota; c__Verrucomicrobiae; o__Verrucomicrobiales; f__Akkermansiaceae; g__Akkermansia
ASV139	0	0	0.000364243	k__Bacteria; p__Firmicutes; c__Bacilli; o__Lactobacillales; f__Lactobacillaceae; g__Lactobacillus; s__Lactobacillus_kunkeei
ASV140	5.87489e-05	0.000152747	0.000164497	k__Bacteria; p__Proteobacteria; c__Alphaproteobacteria; o__Rhodobacterales; f__Rhodobacteraceae; g__Paracoccus
ASV141	0	0.000234996	0.000176247	k__Bacteria; p__Bacteroidota; c__Bacteroidia; o__Bacteroidales; f__Bacteroidaceae; g__Bacteroides
ASV142	8.22484e-05	0.000199746	0.000105748	k__Bacteria; p__Proteobacteria; c__Gammaproteobacteria; o__Burkholderiales; f__Chitinibacteraceae; g__Deefgea
ASV143	2.34996e-05	0.000293744	0.000105748	k__Bacteria; p__Firmicutes; c__Bacilli; o__Lactobacillales; f__Lactobacillaceae; g__Lactobacillus
ASV144	9.39982e-05	0.000176247	9.39982e-05	k__Bacteria; p__Bdellovibrionota; c__Bdellovibrionia; o__Bdellovibrionales; f__Bdellovibrionaceae; g__Bdellovibrio; s__
ASV145	0	0.000364243	4.69991e-05	k__Bacteria; p__Firmicutes; c__Clostridia; o__Lachnospirales; f__Lachnospiraceae; g__Tyzzerella; s__
ASV146	0	0.000434742	0	k__Bacteria; p__Firmicutes; c__Negativicutes; o__Veillonellales-Selenomonadales; f__Veillonellaceae; g__Megasphaera; s__Megasphaera_elsdenii
ASV147	0.000117498	0.000105748	0.000105748	k__Bacteria; p__Proteobacteria; c__Gammaproteobacteria; o__Xanthomonadales; f__Rhodanobacteraceae; g__; s__
ASV148	0	0.000234996	0.000140997	k__Bacteria; p__Proteobacteria; c__Gammaproteobacteria; o__Vibrionales; f__Vibrionaceae; g__Vibrio; s__Vibrio_diazotrophicus
ASV149	0	0.000411242	0	k__Bacteria; p__Firmicutes; c__Bacilli; o__Staphylococcales; f__Staphylococcaceae; g__Staphylococcus
ASV150	0	0.000422992	0	k__Bacteria; p__Proteobacteria; c__Alphaproteobacteria; o__Rhizobiales; f__Xanthobacteraceae; g__Bradyrhizobium
ASV151	8.22484e-05	0.000211496	7.04987e-05	k__Bacteria; p__Proteobacteria; c__Gammaproteobacteria; o__Cellvibrionales; f__Cellvibrionaceae; g__Cellvibrio
ASV152	0	0.000387743	0	k__Bacteria; p__Proteobacteria; c__Alphaproteobacteria; o__Rhizobiales; f__Xanthobacteraceae
ASV153	0	0	0.000281995	k__Bacteria; p__Verrucomicrobiota; c__Verrucomicrobiae; o__Verrucomicrobiales; f__Verrucomicrobiaceae; g__; s__
ASV154	0.000176247	0	8.22484e-05	k__Bacteria; p__Proteobacteria; c__Gammaproteobacteria; o__Pseudomonadales; f__Moraxellaceae; g__Acinetobacter
ASV155	9.39982e-05	0.000246745	0	k__Bacteria; p__Firmicutes; c__Clostridia; o__Lachnospirales; f__Lachnospiraceae; g__Ruminococcus_torques_group
ASV156	0	0.000387743	0	k__Bacteria; p__Firmicutes; c__Bacilli; o__Lactobacillales; f__Lactobacillaceae; g__Lactobacillus; s__Lactobacillus_mucosae
ASV157	0	0	0.000270245	k__Bacteria; p__Firmicutes; c__Bacilli; o__Staphylococcales; f__Staphylococcaceae; g__Staphylococcus
ASV158	0	0	0.000270245	Unassigned
ASV159	8.22484e-05	0	0.000176247	k__Bacteria; p__Proteobacteria; c__Gammaproteobacteria; o__Pseudomonadales; f__Pseudomonadaceae; g__Pseudomonas
ASV160	0.000234996	0	0	k__Bacteria; p__Bacteroidota; c__Bacteroidia; o__Bacteroidales; f__Bacteroidaceae; g__Bacteroides
ASV161	0.000117498	4.69991e-05	8.22484e-05	k__Bacteria; p__Proteobacteria; c__Gammaproteobacteria; o__Xanthomonadales; f__Xanthomonadaceae; g__Stenotrophomonas; s__Stenotrophomonas_rhizophila
ASV162	0.000105748	0.000117498	5.87489e-05	k__Bacteria; p__Proteobacteria; c__Alphaproteobacteria; o__Caulobacterales; f__Caulobacteraceae; g__Brevundimonas
ASV163	0.000129248	0	0.000105748	k__Bacteria; p__Proteobacteria; c__Gammaproteobacteria; o__Burkholderiales; f__Sutterellaceae; g__Parasutterella; s__
ASV164	9.39982e-05	8.22484e-05	9.39982e-05	k__Bacteria; p__Proteobacteria; c__Alphaproteobacteria; o__Reyranellales; f__Reyranellaceae; g__Reyranella; s__
ASV165	3.52493e-05	0.000176247	0.000129248	k__Bacteria; p__Planctomycetota; c__Planctomycetes; o__Pirellulales; f__Pirellulaceae; g__Pirellula; s__bacterium_enrichment
ASV166	3.52493e-05	0.000187996	7.04987e-05	k__Bacteria; p__Actinobacteriota; c__Acidimicrobiia; o__IMCC26256; f__IMCC26256; g__IMCC26256; s__
ASV167	8.22484e-05	0.000117498	0.000117498	k__Bacteria; p__Actinobacteriota; c__Actinobacteria; o__Micrococcales; f__Micrococcaceae; g__Micrococcus
ASV168	0	0.000223246	8.22484e-05	k__Bacteria; p__Bacteroidota; c__Bacteroidia; o__Bacteroidales; f__Rikenellaceae; g__Alistipes; s__Alistipes_putredinis
ASV169	8.22484e-05	8.22484e-05	0.000105748	k__Bacteria; p__Firmicutes; c__Negativicutes; o__Veillonellales-Selenomonadales; f__Selenomonadaceae; g__Mitsuokella; s__
ASV170	0.000117498	0	0.000105748	k__Bacteria; p__Proteobacteria; c__Alphaproteobacteria; o__Rhizobiales; f__Rhizobiaceae
ASV171	0.000223246	0	0	k__Bacteria; p__Proteobacteria; c__Gammaproteobacteria; o__Enterobacterales; f__Enterobacteriaceae; g__Escherichia-Shigella
ASV172	0	0.000328994	0	k__Bacteria; p__Firmicutes; c__Bacilli; o__Lactobacillales; f__Lactobacillaceae; g__Lactobacillus
ASV173	3.52493e-05	0.000164497	7.04987e-05	k__Bacteria; p__Actinobacteriota; c__Acidimicrobiia; o__Microtrichales; f__Iamiaceae; g__Iamia
ASV174	0.000211496	0	0	k__Bacteria; p__Proteobacteria; c__Gammaproteobacteria; o__Orbales; f__Orbaceae; g__Gilliamella; s__Enterobacteriaceae_bacterium
ASV175	0	0.000305494	0	k__Bacteria; p__Firmicutes; c__Clostridia; o__Lachnospirales; f__Lachnospiraceae; g__Agathobacter
ASV176	0.000223246	0	0	k__Bacteria; p__Firmicutes; c__Bacilli; o__Lactobacillales; f__Lactobacillaceae; g__Lactobacillus; s__Lactobacillus_mellis
ASV177	0	0.000305494	0	k__Bacteria; p__Proteobacteria; c__Gammaproteobacteria; o__Burkholderiales; f__Sutterellaceae; g__Parasutterella; s__
ASV178	0	0.000258495	3.52493e-05	k__Bacteria; p__Planctomycetota; c__Planctomycetes; o__Gemmatales; f__Gemmataceae; g__; s__
ASV179	0	0.000258495	3.52493e-05	k__Bacteria; p__Firmicutes; c__Clostridia; o__Clostridia_UCG-014; f__Clostridia_UCG-014; g__Clostridia_UCG-014; s__
ASV180	7.04987e-05	0.000129248	3.52493e-05	k__Bacteria; p__Chloroflexi; c__Anaerolineae; o__Caldilineales; f__Caldilineaceae; g__; s__
ASV181	0.000117498	9.39982e-05	2.34996e-05	k__Bacteria; p__Firmicutes; c__Bacilli; o__Erysipelotrichales; f__Erysipelatoclostridiaceae; g__Catenibacterium; s__
ASV182	0	0.000293744	0	k__Bacteria
ASV183	5.87489e-05	8.22484e-05	7.04987e-05	k__Bacteria; p__Proteobacteria; c__Alphaproteobacteria; o__Rhizobiales
ASV184	7.04987e-05	9.39982e-05	7.04987e-05	k__Bacteria; p__Proteobacteria; c__Gammaproteobacteria; o__Burkholderiales; f__Rhodocyclaceae; g__Methyloversatilis
ASV185	0	0.000223246	5.87489e-05	k__Archaea
ASV186	2.34996e-05	0.000234996	0	k__Bacteria; p__Proteobacteria; c__Gammaproteobacteria; o__Alteromonadales; f__Pseudoalteromonadaceae; g__Pseudoalteromonas
ASV187	0	0.000293744	0	k__Bacteria; p__Actinobacteriota; c__Actinobacteria; o__Bifidobacteriales; f__Bifidobacteriaceae; g__Bifidobacterium; s__Bifidobacterium_longum
ASV188	0	0.000258495	0	k__Bacteria; p__Acidobacteriota; c__Acidobacteriae; o__Acidobacteriales; f__; g__; s__
ASV189	7.04987e-05	0.000187996	0	k__Bacteria; p__Firmicutes; c__Clostridia; o__Lachnospirales; f__Lachnospiraceae; g__Fusicatenibacter; s__
ASV190	0	0.000129248	9.39982e-05	k__Bacteria; p__Proteobacteria; c__Gammaproteobacteria; o__Pseudomonadales; f__Moraxellaceae; g__Acinetobacter
ASV191	0	0	0.000199746	k__Bacteria; p__Proteobacteria; c__Gammaproteobacteria; o__Alteromonadales; f__Pseudoalteromonadaceae; g__Pseudoalteromonas
ASV192	2.34996e-05	0.000152747	4.69991e-05	k__Bacteria; p__Firmicutes; c__Negativicutes; o__Acidaminococcales; f__Acidaminococcaceae; g__Phascolarctobacterium
ASV193	0.000176247	0	0	k__Bacteria; p__Firmicutes; c__Bacilli; o__Lactobacillales; f__Lactobacillaceae; g__Lactobacillus
ASV194	0	0.000258495	0	k__Bacteria; p__Verrucomicrobiota; c__Verrucomicrobiae; o__Verrucomicrobiales; f__Verrucomicrobiaceae; g__; s__
ASV195	0	5.87489e-05	0.000129248	k__Bacteria; p__Proteobacteria; c__Gammaproteobacteria; o__Burkholderiales; f__Neisseriaceae; g__Uruburuella; s__Neisseria_sp.
ASV196	5.87489e-05	0	0.000105748	k__Bacteria; p__Proteobacteria; c__Alphaproteobacteria; o__Acetobacterales; f__Acetobacteraceae; g__Roseomonas
ASV197	8.22484e-05	0.000117498	0	k__Bacteria; p__Verrucomicrobiota; c__Verrucomicrobiae; o__Verrucomicrobiales; f__Rubritaleaceae; g__Luteolibacter; s__
ASV198	0	0.000246745	0	k__Bacteria; p__Firmicutes; c__Bacilli; o__Lactobacillales; f__Lactobacillaceae; g__Lactobacillus
ASV199	0	0.000234996	0	k__Bacteria; p__Acidobacteriota; c__Acidobacteriae; o__Subgroup_2; f__Subgroup_2; g__Subgroup_2; s__
ASV200	0	0.000234996	0	k__Bacteria; p__Firmicutes; c__Clostridia; o__Lachnospirales; f__Lachnospiraceae
ASV201	0	0.000234996	0	Unassigned
ASV202	0	0.000234996	0	k__Bacteria; p__Acidobacteriota; c__Vicinamibacteria; o__Vicinamibacterales; f__; g__; s__
ASV203	0	0.000223246	0	k__Bacteria; p__Acidobacteriota; c__Acidobacteriae; o__Subgroup_2; f__Subgroup_2; g__Subgroup_2; s__
ASV204	0.000105748	0	5.87489e-05	k__Bacteria; p__Firmicutes; c__Clostridia; o__Oscillospirales; f__Ruminococcaceae; g__CAG-352; s__
ASV205	0	0.000117498	9.39982e-05	k__Bacteria; p__Planctomycetota; c__Planctomycetes; o__Isosphaerales; f__Isosphaeraceae; g__Tundrisphaera; s__
ASV206	0	0	0.000164497	k__Bacteria
ASV207	2.34996e-05	8.22484e-05	7.04987e-05	k__Bacteria; p__Planctomycetota; c__Planctomycetes; o__Gemmatales; f__Gemmataceae; g__Gemmata; s__
ASV208	0	0	0.000164497	Unassigned
ASV209	0	0	0.000164497	k__Bacteria; p__Proteobacteria; c__Gammaproteobacteria; o__Pseudomonadales; f__Moraxellaceae; g__Acinetobacter
ASV210	8.22484e-05	9.39982e-05	0	k__Bacteria; p__Firmicutes; c__Clostridia; o__Oscillospirales; f__Ruminococcaceae; g__Subdoligranulum; s__
ASV211	0	0.000223246	0	k__Bacteria; p__Actinobacteriota; c__Acidimicrobiia; o__Microtrichales; f__Iamiaceae; g__Iamia; s__
ASV212	8.22484e-05	9.39982e-05	0	k__Bacteria; p__Proteobacteria; c__Gammaproteobacteria; o__Burkholderiales; f__Comamonadaceae; g__Hydrogenophaga
ASV213	0	0.000199746	0	k__Bacteria; p__Firmicutes; c__Clostridia; o__Peptostreptococcales-Tissierellales; f__Peptostreptococcaceae; g__Romboutsia
ASV214	0	0.000211496	0	Unassigned
ASV215	0	0.000211496	0	k__Bacteria; p__Proteobacteria; c__Gammaproteobacteria; o__Pseudomonadales; f__Pseudomonadaceae; g__Pseudomonas
ASV216	0.000140997	0	0	k__Bacteria; p__Fusobacteriota; c__Fusobacteriia; o__Fusobacteriales; f__Fusobacteriaceae; g__Cetobacterium; s__
ASV217	4.69991e-05	0.000152747	0	k__Bacteria; p__Verrucomicrobiota; c__Verrucomicrobiae; o__Verrucomicrobiales
ASV218	8.22484e-05	8.22484e-05	5.87489e-05	k__Bacteria; p__Proteobacteria; c__Alphaproteobacteria; o__Sphingomonadales; f__Sphingomonadaceae; g__Altererythrobacter
ASV219	0.000129248	7.04987e-05	0	k__Bacteria; p__Proteobacteria; c__Gammaproteobacteria; o__Burkholderiales; f__Sutterellaceae; g__Sutterella; s__Sutterella_wadsworthensis
ASV220	7.04987e-05	0.000105748	0	k__Bacteria; p__Firmicutes; c__Bacilli; o__Lactobacillales; f__Leuconostocaceae; g__Weissella
ASV221	5.87489e-05	9.39982e-05	3.52493e-05	k__Bacteria; p__Firmicutes; c__Negativicutes; o__Veillonellales-Selenomonadales; f__Veillonellaceae; g__Allisonella; s__
ASV222	0	0	0.000152747	k__Bacteria; p__Proteobacteria; c__Gammaproteobacteria; o__Burkholderiales; f__Chromobacteriaceae; g__Vogesella
ASV223	0.000129248	0	0	k__Bacteria
ASV224	0	0.000187996	0	k__Bacteria; p__Actinobacteriota; c__Acidimicrobiia; o__Microtrichales; f__Microtrichaceae; g__IMCC26207; s__
ASV225	0	0.000223246	0	k__Bacteria; p__Actinobacteriota; c__Actinobacteria; o__Micrococcales; f__Micrococcaceae; g__Arthrobacter
ASV226	0	0.000199746	0	k__Bacteria; p__Proteobacteria; c__Gammaproteobacteria; o__Pseudomonadales; f__Moraxellaceae; g__Acinetobacter; s__Acinetobacter_indicus
ASV227	0	0.000199746	0	k__Bacteria; p__Acidobacteriota; c__Acidobacteriae; o__Subgroup_2; f__Subgroup_2; g__Subgroup_2; s__
ASV228	0	0.000199746	0	k__Bacteria; p__Proteobacteria; c__Alphaproteobacteria; o__Rhizobiales; f__Xanthobacteraceae
ASV229	2.34996e-05	0.000164497	0	k__Bacteria; p__Actinobacteriota; c__Actinobacteria; o__Corynebacteriales; f__Corynebacteriaceae; g__Corynebacterium; s__Corynebacterium_tuberculostearicum
ASV230	0	0.000187996	0	k__Bacteria; p__Proteobacteria; c__Gammaproteobacteria; o__Pseudomonadales; f__Moraxellaceae; g__Acinetobacter; s__Acinetobacter_guillouiae
ASV231	0	0.000187996	0	k__Bacteria; p__Actinobacteriota; c__Thermoleophilia; o__Solirubrobacterales
ASV232	0.000129248	0	0	k__Bacteria; p__Firmicutes; c__Clostridia; o__Clostridia_UCG-014; f__Clostridia_UCG-014; g__Clostridia_UCG-014; s__
ASV233	0	0.000152747	2.34996e-05	k__Bacteria; p__Firmicutes; c__Bacilli; o__Lactobacillales; f__Lactobacillaceae; g__Lactobacillus; s__Lactobacillus_gasseri
ASV234	0.000129248	0	0	k__Bacteria; p__Firmicutes; c__Clostridia; o__Oscillospirales; f__Oscillospiraceae; g__UCG-005; s__
ASV235	7.04987e-05	0	4.69991e-05	k__Bacteria; p__Proteobacteria; c__Alphaproteobacteria; o__Rhizobiales; f__Rhizobiales_Incertae_Sedis; g__Bauldia; s__
ASV236	0	0	0.000140997	k__Bacteria; p__Proteobacteria; c__Gammaproteobacteria; o__Pseudomonadales; f__Moraxellaceae; g__Acinetobacter
ASV237	0	0.000187996	0	k__Bacteria; p__Actinobacteriota; c__Thermoleophilia; o__Solirubrobacterales; f__Solirubrobacteraceae; g__Conexibacter; s__
ASV238	0	0.000164497	0	k__Bacteria; p__Proteobacteria; c__Alphaproteobacteria; o__Rhizobiales; f__Xanthobacteraceae
ASV239	0	0.000187996	0	k__Bacteria; p__Proteobacteria; c__Gammaproteobacteria; o__Pseudomonadales; f__Pseudomonadaceae; g__Pseudomonas
ASV240	0	0.000176247	0	k__Bacteria; p__Firmicutes; c__Clostridia; o__Oscillospirales; f__Oscillospiraceae; g__UCG-005; s__
ASV241	0	0.000187996	0	k__Bacteria; p__Acidobacteriota; c__Acidobacteriae; o__Subgroup_2; f__Subgroup_2; g__Subgroup_2; s__
ASV242	0	0.000176247	0	k__Bacteria; p__Firmicutes; c__Bacilli; o__Erysipelotrichales; f__Erysipelotrichaceae; g__Faecalibaculum; s__
ASV243	0	0.000187996	0	Unassigned
ASV244	0	0.000187996	0	k__Bacteria; p__Proteobacteria; c__Gammaproteobacteria; o__Burkholderiales; f__A21b; g__A21b; s__
ASV245	0	0.000176247	0	k__Bacteria; p__Proteobacteria; c__Alphaproteobacteria; o__Rhizobiales; f__Devosiaceae; g__Devosia
ASV246	0	0.000176247	0	k__Bacteria; p__Actinobacteriota; c__Thermoleophilia; o__Gaiellales; f__; g__; s__
ASV247	0	0.000187996	0	k__Bacteria; p__Acidobacteriota; c__Acidobacteriae; o__Solibacterales; f__Solibacteraceae; g__Candidatus_Solibacter; s__
ASV248	3.52493e-05	0.000117498	0	k__Bacteria; p__Proteobacteria; c__Alphaproteobacteria; o__Rhizobiales; f__Hyphomicrobiaceae; g__Hyphomicrobium
ASV249	5.87489e-05	9.39982e-05	0	k__Bacteria; p__Proteobacteria; c__Alphaproteobacteria; o__Acetobacterales; f__Acetobacteraceae
ASV250	0	0.000152747	1.17498e-05	k__Bacteria; p__Actinobacteriota; c__Actinobacteria; o__Corynebacteriales; f__Corynebacteriaceae; g__Lawsonella
ASV251	0	0.000164497	0	k__Bacteria; p__Myxococcota; c__Polyangia; o__Haliangiales; f__Haliangiaceae; g__Haliangium; s__myxobacterium_AT3-03
ASV252	0	0.000176247	0	k__Bacteria
ASV253	0	0.000187996	0	k__Bacteria; p__Firmicutes; c__Clostridia; o__Oscillospirales; f__Ruminococcaceae; g__Ruminococcus
ASV254	0	0.000176247	0	k__Bacteria; p__Bacteroidota; c__Bacteroidia; o__Bacteroidales; f__Bacteroidaceae; g__Bacteroides; s__Bacteroides_plebeius
ASV255	0	0.000176247	0	k__Bacteria; p__Actinobacteriota; c__Actinobacteria; o__Micrococcales; f__Micrococcaceae; g__Pseudarthrobacter
ASV256	0	0.000152747	0	k__Bacteria; p__Proteobacteria; c__Alphaproteobacteria; o__Sphingomonadales; f__Sphingomonadaceae; g__Sphingomonas
ASV257	0	0.000152747	0	k__Bacteria; p__Proteobacteria; c__Gammaproteobacteria; o__WD260; f__WD260; g__WD260; s__
ASV258	0	0.000152747	0	k__Bacteria; p__Proteobacteria; c__Gammaproteobacteria; o__Xanthomonadales; f__Rhodanobacteraceae; g__Dokdonella; s__
ASV259	0	0.000164497	0	k__Bacteria; p__Acidobacteriota; c__Acidobacteriae; o__Acidobacteriales; f__; g__; s__
ASV260	0	0.000164497	0	k__Bacteria; p__Proteobacteria; c__Alphaproteobacteria; o__Micropepsales; f__Micropepsaceae; g__; s__
ASV261	0	0.000129248	2.34996e-05	k__Bacteria; p__Firmicutes; c__Clostridia; o__Lachnospirales; f__Lachnospiraceae; g__Coprococcus
ASV262	0	0	0.000117498	k__Bacteria; p__Firmicutes; c__Bacilli; o__Lactobacillales; f__Lactobacillaceae; g__Lactobacillus; s__Lactobacillus_apinorum
ASV263	0	0.000152747	0	k__Bacteria; p__Proteobacteria; c__Alphaproteobacteria; o__Rhizobiales; f__Xanthobacteraceae
ASV264	0	0.000152747	0	k__Bacteria; p__Bacteroidota; c__Bacteroidia; o__Bacteroidales; f__Bacteroidaceae; g__Bacteroides; s__Bacteroides_stercoris
ASV265	0	0.000152747	0	k__Bacteria; p__Proteobacteria; c__Alphaproteobacteria; o__Rhizobiales
ASV266	0	0.000152747	0	k__Bacteria; p__Actinobacteriota; c__Thermoleophilia; o__Gaiellales; f__Gaiellaceae; g__Gaiella; s__
ASV267	0	0.000152747	0	k__Bacteria; p__Firmicutes; c__Negativicutes; o__Veillonellales-Selenomonadales; f__Selenomonadaceae; g__Mitsuokella; s__
ASV268	0	0.000152747	0	k__Bacteria; p__Proteobacteria; c__Gammaproteobacteria; o__Aeromonadales; f__Aeromonadaceae; g__Aeromonas
ASV269	0	0.000152747	0	k__Bacteria; p__Firmicutes; c__Clostridia; o__Lachnospirales; f__Lachnospiraceae
ASV270	0	0.000152747	0	k__Bacteria; p__Proteobacteria; c__Alphaproteobacteria; o__Rhizobiales; f__Rhizobiaceae
ASV271	0	0.000152747	0	k__Bacteria; p__Bacteroidota; c__Bacteroidia; o__Bacteroidales; f__Prevotellaceae; g__Prevotella; s__Prevotella_stercorea
ASV272	0	0.000152747	0	k__Bacteria; p__Proteobacteria; c__Gammaproteobacteria; o__Pasteurellales; f__Pasteurellaceae; g__Actinobacillus; s__Actinobacillus_porcinus
ASV273	0	0.000152747	0	k__Bacteria
ASV274	1.17498e-05	0	9.39982e-05	k__Bacteria; p__Proteobacteria; c__Gammaproteobacteria; o__Burkholderiales; f__Burkholderiaceae; g__Cupriavidus; s__Cupriavidus_pauculus
ASV275	9.39982e-05	0	0	Unassigned
ASV276	7.04987e-05	7.04987e-05	0	k__Bacteria; p__Proteobacteria; c__Alphaproteobacteria; o__Rhizobiales; f__Hyphomicrobiaceae; g__Hyphomicrobium; s__Hyphomicrobium_zavarzinii
ASV277	7.04987e-05	0	4.69991e-05	k__Bacteria; p__Patescibacteria; c__Saccharimonadia; o__Saccharimonadales; f__Saccharimonadales; g__Saccharimonadales; s__
ASV278	0	0.000152747	0	k__Bacteria; p__Firmicutes; c__Clostridia; o__Lachnospirales; f__Lachnospiraceae; g__Anaerostipes
ASV279	0	0.000164497	0	k__Bacteria; p__Proteobacteria; c__Alphaproteobacteria; o__Rhizobiales; f__Beijerinckiaceae; g__Microvirga
ASV280	0	0.000140997	0	Unassigned
ASV281	0	0.000129248	0	k__Bacteria; p__Bacteroidota; c__Bacteroidia; o__Bacteroidales; f__Bacteroidaceae; g__Bacteroides; s__Bacteroides_massiliensis
ASV282	0	0.000140997	0	k__Bacteria; p__Acidobacteriota; c__Acidobacteriae; o__Subgroup_2; f__Subgroup_2; g__Subgroup_2; s__bacterium_Ellin7509
ASV283	0	0.000129248	0	Unassigned
ASV284	0	0.000129248	0	k__Bacteria; p__Firmicutes; c__Clostridia; o__Lachnospirales; f__Lachnospiraceae; g__Blautia; s__Lachnospiraceae_bacterium
ASV285	0	0.000140997	0	k__Bacteria; p__Proteobacteria; c__Gammaproteobacteria; o__PLTA13; f__PLTA13; g__PLTA13; s__
ASV286	0	0.000140997	0	k__Bacteria; p__Acidobacteriota; c__Vicinamibacteria; o__Vicinamibacterales; f__Vicinamibacteraceae; g__Vicinamibacteraceae; s__
ASV287	0	0.000129248	0	k__Bacteria; p__Firmicutes; c__Clostridia; o__Oscillospirales; f__Oscillospiraceae; g__NK4A214_group; s__
ASV288	0	0.000129248	0	k__Bacteria; p__Proteobacteria; c__Gammaproteobacteria; o__Cellvibrionales; f__Halieaceae; g__OM60(NOR5)_clade; s__
ASV289	2.34996e-05	9.39982e-05	0	k__Bacteria; p__Proteobacteria; c__Gammaproteobacteria
ASV290	9.39982e-05	0	0	k__Bacteria; p__Proteobacteria; c__Alphaproteobacteria; o__Rhizobiales; f__Hyphomicrobiaceae; g__Pedomicrobium
ASV291	1.17498e-05	0	8.22484e-05	k__Bacteria; p__Firmicutes; c__Bacilli; o__Lactobacillales; f__Streptococcaceae; g__Streptococcus
ASV292	0	0.000129248	0	k__Bacteria; p__Actinobacteriota; c__Actinobacteria; o__Corynebacteriales; f__Corynebacteriaceae; g__Corynebacterium; s__Corynebacterium_confusum
ASV293	0	0.000117498	0	k__Bacteria; p__Proteobacteria; c__Alphaproteobacteria; o__Acetobacterales; f__Acetobacteraceae; g__Roseomonas
ASV294	0	0.000129248	0	k__Bacteria; p__Bacteroidota; c__Bacteroidia; o__Chitinophagales; f__Chitinophagaceae; g__Puia; s__
ASV295	0	0.000117498	0	k__Bacteria; p__Proteobacteria; c__Alphaproteobacteria; o__Rhizobiales; f__Xanthobacteraceae
ASV296	0	0.000117498	0	k__Bacteria; p__Actinobacteriota; c__Thermoleophilia; o__Gaiellales
ASV297	0	0.000117498	0	k__Bacteria; p__Proteobacteria; c__Gammaproteobacteria; o__Pseudomonadales; f__Pseudomonadaceae; g__Pseudomonas
ASV298	0	0.000117498	0	k__Bacteria; p__Firmicutes; c__Clostridia; o__Oscillospirales; f__Eubacterium_coprostanoligenes_group; g__Eubacterium_coprostanoligenes_group; s__
ASV299	0	0.000129248	0	k__Bacteria; p__Firmicutes; c__Clostridia; o__Lachnospirales; f__Lachnospiraceae; g__Roseburia
ASV300	0	0.000140997	0	k__Bacteria; p__Proteobacteria; c__Alphaproteobacteria; o__Rhizobiales; f__Xanthobacteraceae
ASV301	0	0.000129248	0	k__Bacteria; p__Proteobacteria; c__Alphaproteobacteria; o__Elsterales; f__; g__; s__
ASV302	0	0.000129248	0	k__Bacteria; p__Proteobacteria; c__Gammaproteobacteria; o__Enterobacterales; f__Enterobacteriaceae; g__Citrobacter
ASV303	0	0.000117498	0	Unassigned
ASV304	0	0.000117498	0	k__Bacteria; p__Proteobacteria; c__Gammaproteobacteria; o__Burkholderiales; f__Comamonadaceae; g__Aquabacterium; s__
ASV305	0	0.000117498	0	Unassigned
ASV306	0	0.000152747	0	k__Bacteria; p__Acidobacteriota; c__Acidobacteriae; o__Acidobacteriales; f__; g__; s__
ASV307	0	0.000117498	0	k__Bacteria; p__Actinobacteriota; c__MB-A2-108; o__MB-A2-108; f__MB-A2-108; g__MB-A2-108; s__
ASV308	0	8.22484e-05	3.52493e-05	k__Bacteria; p__Proteobacteria; c__Alphaproteobacteria; o__Rhizobiales; f__Rhizobiales_Incertae_Sedis; g__Nordella; s__
ASV309	0	0.000117498	0	k__Bacteria; p__Proteobacteria; c__Alphaproteobacteria; o__Rhizobiales; f__Beijerinckiaceae; g__Roseiarcus; s__
ASV310	2.34996e-05	4.69991e-05	8.22484e-05	k__Bacteria; p__Patescibacteria; c__Berkelbacteria; o__Berkelbacteria; f__Berkelbacteria; g__Berkelbacteria; s__
ASV311	4.69991e-05	0	3.52493e-05	k__Bacteria; p__Proteobacteria; c__Gammaproteobacteria; o__Oceanospirillales; f__Pseudohongiellaceae; g__Pseudohongiella; s__Betaproteobacteria_bacterium
ASV312	2.34996e-05	4.69991e-05	2.34996e-05	k__Bacteria; p__Proteobacteria; c__Gammaproteobacteria; o__Burkholderiales; f__Comamonadaceae
ASV313	0	0	9.39982e-05	k__Bacteria; p__Firmicutes; c__Clostridia; o__Oscillospirales; f__Oscillospiraceae; g__UCG-005; s__
ASV314	0	9.39982e-05	2.34996e-05	k__Bacteria; p__Proteobacteria; c__Alphaproteobacteria; o__Caulobacterales; f__Caulobacteraceae; g__Brevundimonas
ASV315	5.87489e-05	0	3.52493e-05	k__Bacteria; p__Firmicutes; c__Clostridia; o__Lachnospirales; f__Lachnospiraceae; g__Coprococcus; s__Coprococcus_comes
ASV316	0	0	9.39982e-05	k__Bacteria; p__Proteobacteria; c__Alphaproteobacteria; o__Rhodobacterales; f__Rhodobacteraceae; g__Rhodobacter
ASV317	8.22484e-05	0	0	k__Bacteria; p__Actinobacteriota; c__Actinobacteria; o__Bifidobacteriales; f__Bifidobacteriaceae; g__Bifidobacterium; s__Bifidobacterium_longum
ASV318	0	0.000152747	0	k__Bacteria; p__Actinobacteriota; c__Thermoleophilia; o__Solirubrobacterales; f__67-14; g__67-14; s__
ASV319	0	0.000117498	0	k__Bacteria; p__Bacteroidota; c__Bacteroidia; o__Bacteroidales; f__Bacteroidaceae; g__Bacteroides
ASV320	0	0.000117498	0	Unassigned
ASV321	0	0.000117498	0	Unassigned
ASV322	0	0.000117498	0	k__Bacteria; p__Acidobacteriota; c__Acidobacteriae; o__Subgroup_2; f__Subgroup_2; g__Subgroup_2; s__
ASV323	0	0.000117498	0	k__Bacteria; p__Proteobacteria; c__Gammaproteobacteria; o__Burkholderiales; f__Neisseriaceae; g__; s__
ASV324	0	0.000117498	0	k__Bacteria; p__Acidobacteriota; c__Vicinamibacteria; o__Vicinamibacterales; f__Vicinamibacteraceae; g__Vicinamibacteraceae; s__
ASV325	0	0.000117498	0	k__Bacteria; p__Firmicutes; c__Clostridia; o__Clostridia_UCG-014; f__Clostridia_UCG-014; g__Clostridia_UCG-014; s__
ASV326	0	0.000117498	0	Unassigned
ASV327	0	0.000117498	0	k__Bacteria; p__Firmicutes; c__Bacilli; o__Erysipelotrichales; f__Erysipelotrichaceae; g__Dubosiella; s__
ASV328	0	0.000117498	0	k__Bacteria; p__Firmicutes; c__Clostridia; o__Lachnospirales; f__Lachnospiraceae; g__Lachnoclostridium
ASV329	0	0.000117498	0	k__Bacteria; p__Proteobacteria; c__Gammaproteobacteria; o__Burkholderiales; f__Comamonadaceae
ASV330	0	0.000117498	0	Unassigned
ASV331	0	0.000117498	0	k__Bacteria; p__Proteobacteria; c__Alphaproteobacteria; o__Sphingomonadales; f__Sphingomonadaceae; g__Sphingomonas
ASV332	0	0.000117498	0	k__Bacteria; p__Firmicutes; c__Clostridia; o__Oscillospirales; f__Oscillospiraceae; g__UCG-002; s__
ASV333	0	0.000117498	0	k__Bacteria; p__Proteobacteria; c__Gammaproteobacteria; o__Burkholderiales; f__Nitrosomonadaceae; g__Ellin6067; s__
ASV334	0	0.000117498	0	k__Bacteria; p__Acidobacteriota; c__Acidobacteriae; o__Acidobacteriales; f__Koribacteraceae; g__Candidatus_Koribacter; s__
ASV335	0	0.000117498	0	k__Bacteria
ASV336	0	0.000117498	0	k__Bacteria; p__Actinobacteriota; c__Actinobacteria; o__Micrococcales; f__Microbacteriaceae; g__Microbacterium
ASV337	1.17498e-05	5.87489e-05	2.34996e-05	k__Bacteria; p__Actinobacteriota; c__Actinobacteria
ASV338	0	0	0.000105748	k__Bacteria; p__Firmicutes; c__Bacilli; o__Erysipelotrichales; f__Erysipelotrichaceae; g__Dubosiella; s__
ASV339	0	0	0.000105748	k__Bacteria; p__Proteobacteria; c__Gammaproteobacteria; o__Pseudomonadales; f__Pseudomonadaceae; g__Pseudomonas
ASV340	0	0.000117498	0	k__Bacteria; p__Bacteroidota; c__Bacteroidia; o__Bacteroidales; f__Muribaculaceae; g__Muribaculaceae; s__
ASV341	0	4.69991e-05	5.87489e-05	k__Bacteria; p__Gemmatimonadota; c__Gemmatimonadetes; o__Gemmatimonadales; f__Gemmatimonadaceae; g__Gemmatimonas; s__
ASV342	0	0.000117498	0	k__Bacteria; p__Proteobacteria; c__Alphaproteobacteria; o__Rhizobiales; f__Devosiaceae; g__Pelagibacterium
ASV343	0	0.000117498	0	k__Bacteria
ASV344	0	0.000117498	0	Unassigned
ASV345	0	0.000117498	0	k__Bacteria; p__Verrucomicrobiota; c__Verrucomicrobiae; o__Chthoniobacterales; f__Chthoniobacteraceae; g__Candidatus_Udaeobacter; s__
ASV346	0	0.000117498	0	k__Bacteria; p__Proteobacteria; c__Alphaproteobacteria; o__Acetobacterales; f__Acetobacteraceae
ASV347	0	0.000117498	0	k__Bacteria; p__Firmicutes; c__Clostridia; o__Lachnospirales; f__Lachnospiraceae; g__Lachnospira; s__
ASV348	0	0.000105748	0	k__Bacteria; p__Actinobacteriota; c__Thermoleophilia; o__Gaiellales
ASV349	0	9.39982e-05	0	k__Bacteria; p__Actinobacteriota; c__Acidimicrobiia; o__IMCC26256; f__IMCC26256; g__IMCC26256; s__
ASV350	0	9.39982e-05	0	k__Bacteria; p__Cyanobacteria; c__Cyanobacteriia; o__Chloroplast; f__Chloroplast; g__Chloroplast
ASV351	0	9.39982e-05	0	k__Bacteria; p__Firmicutes; c__Bacilli; o__Erysipelotrichales; f__Erysipelotrichaceae; g__ZOR0006
ASV352	0	0.000105748	0	k__Bacteria; p__Gemmatimonadota; c__Gemmatimonadetes; o__Gemmatimonadales; f__Gemmatimonadaceae
ASV353	0	0.000105748	0	k__Bacteria; p__Actinobacteriota; c__Thermoleophilia; o__Gaiellales; f__; g__; s__
ASV354	0	0.000105748	0	k__Bacteria; p__Proteobacteria; c__Gammaproteobacteria; o__Burkholderiales; f__Nitrosomonadaceae; g__GOUTA6; s__
ASV355	0	0.000105748	0	k__Bacteria; p__Actinobacteriota; c__Thermoleophilia; o__Gaiellales; f__; g__
ASV356	0	0.000105748	0	k__Bacteria; p__Proteobacteria; c__Gammaproteobacteria; o__Burkholderiales; f__Neisseriaceae; g__Neisseria
ASV357	0	0.000105748	0	k__Bacteria; p__Actinobacteriota; c__Actinobacteria; o__Frankiales; f__Acidothermaceae; g__Acidothermus; s__
ASV358	0	0.000117498	0	k__Bacteria; p__Firmicutes; c__Clostridia; o__Peptostreptococcales-Tissierellales; f__Peptostreptococcaceae; g__Intestinibacter
ASV359	0	9.39982e-05	0	k__Bacteria; p__Acidobacteriota; c__Acidobacteriae; o__Acidobacteriales; f__Acidobacteriaceae_(Subgroup_1); g__Occallatibacter
ASV360	0	9.39982e-05	0	k__Bacteria; p__Actinobacteriota; c__Actinobacteria; o__Micrococcales; f__Micrococcaceae; g__Micrococcus
ASV361	0	0.000117498	0	k__Bacteria; p__Firmicutes; c__Clostridia; o__Oscillospirales; f__Butyricicoccaceae; g__Butyricicoccus
ASV362	0	0.000117498	0	k__Bacteria; p__Acidobacteriota; c__Acidobacteriae; o__Solibacterales; f__Solibacteraceae; g__Candidatus_Solibacter
ASV363	0	9.39982e-05	0	k__Bacteria; p__Proteobacteria; c__Alphaproteobacteria; o__Sphingomonadales; f__Sphingomonadaceae
ASV364	0	9.39982e-05	0	k__Bacteria; p__Actinobacteriota; c__Thermoleophilia; o__Solirubrobacterales; f__Solirubrobacteraceae; g__Solirubrobacter; s__
ASV365	0	0.000117498	0	k__Bacteria; p__Proteobacteria; c__Alphaproteobacteria; o__Rhizobiales; f__Pleomorphomonadaceae; g__Pleomorphomonas; s__
ASV366	0	0.000105748	0	k__Bacteria; p__Firmicutes; c__Clostridia; o__Lachnospirales; f__Lachnospiraceae; g__Ruminococcus_torques_group
ASV367	0	0.000105748	0	k__Bacteria; p__Firmicutes; c__Clostridia; o__Lachnospirales; f__Lachnospiraceae
ASV368	0	0.000117498	0	k__Bacteria
ASV369	0	9.39982e-05	0	k__Bacteria; p__Firmicutes; c__Bacilli; o__Bacillales; f__Bacillaceae; g__Bacillus
ASV370	0	0.000105748	0	k__Bacteria; p__Proteobacteria; c__Alphaproteobacteria; o__Rhizobiales; f__Hyphomicrobiaceae; g__Hyphomicrobium; s__Hyphomicrobium_vulgare
ASV371	0	0.000105748	0	k__Bacteria; p__Proteobacteria; c__Alphaproteobacteria; o__Rhodobacterales; f__Rhodobacteraceae
ASV372	0	0.000105748	0	k__Bacteria; p__Proteobacteria; c__Alphaproteobacteria; o__; f__; g__; s__Rhodospirillaceae_bacterium
ASV373	0	9.39982e-05	0	k__Bacteria; p__Firmicutes; c__Clostridia; o__Oscillospirales; f__Ruminococcaceae; g__Ruminococcus; s__Ruminococcus_bicirculans
ASV374	0	9.39982e-05	0	k__Bacteria; p__Proteobacteria; c__Alphaproteobacteria; o__Rhodobacterales; f__Rhodobacteraceae; g__Rubellimicrobium; s__
ASV375	0	0	7.04987e-05	k__Bacteria; p__Firmicutes; c__Clostridia; o__Lachnospirales; f__Lachnospiraceae; g__Fusicatenibacter; s__
ASV376	0	9.39982e-05	0	k__Bacteria; p__Proteobacteria; c__Alphaproteobacteria; o__Acetobacterales; f__Acetobacteraceae; g__
ASV377	0	0	7.04987e-05	k__Bacteria; p__Proteobacteria; c__Gammaproteobacteria; o__Pseudomonadales; f__Moraxellaceae; g__Psychrobacter
ASV378	2.34996e-05	0	4.69991e-05	k__Bacteria; p__Bacteroidota; c__Bacteroidia; o__Flavobacteriales; f__Flavobacteriaceae; g__Flavobacterium; s__Flavobacterium_filum
ASV379	0	5.87489e-05	3.52493e-05	k__Bacteria; p__Dependentiae; c__Babeliae; o__Babeliales
ASV380	0	0	9.39982e-05	k__Bacteria; p__Bacteroidota; c__Bacteroidia; o__Bacteroidales; f__Rikenellaceae; g__Alistipes; s__
ASV381	3.52493e-05	0	3.52493e-05	k__Bacteria; p__Gemmatimonadota; c__Gemmatimonadetes; o__Gemmatimonadales; f__Gemmatimonadaceae
ASV382	0	0	7.04987e-05	k__Bacteria; p__Proteobacteria; c__Gammaproteobacteria; o__Pseudomonadales; f__Moraxellaceae; g__Acinetobacter
ASV383	0	0	7.04987e-05	k__Bacteria
ASV384	0	0	9.39982e-05	k__Bacteria; p__Firmicutes; c__Clostridia; o__Oscillospirales; f__Ruminococcaceae; g__Subdoligranulum; s__
ASV385	0	0	8.22484e-05	k__Bacteria; p__Proteobacteria; c__Gammaproteobacteria; o__Pseudomonadales; f__Moraxellaceae; g__Acinetobacter; s__Acinetobacter_indicus
ASV386	0	0	7.04987e-05	k__Bacteria; p__Proteobacteria; c__Gammaproteobacteria; o__Enterobacterales; f__Enterobacteriaceae; g__Plesiomonas
ASV387	2.34996e-05	4.69991e-05	2.34996e-05	Unassigned
ASV388	7.04987e-05	0	0	k__Bacteria; p__Firmicutes; c__Bacilli; o__Erysipelotrichales; f__Erysipelotrichaceae; g__Faecalibaculum; s__
ASV389	7.04987e-05	0	0	k__Bacteria; p__Proteobacteria; c__Gammaproteobacteria; o__Pseudomonadales; f__Moraxellaceae; g__Acinetobacter; s__Acinetobacter_indicus
ASV390	2.34996e-05	8.22484e-05	0	k__Bacteria; p__Actinobacteriota; c__Thermoleophilia; o__Solirubrobacterales; f__67-14; g__67-14; s__Solirubrobacterales_bacterium
ASV391	0	9.39982e-05	0	k__Bacteria; p__Myxococcota; c__Polyangia; o__Polyangiales
ASV392	7.04987e-05	0	0	k__Bacteria
ASV393	7.04987e-05	0	0	Unassigned
ASV394	7.04987e-05	0	0	Unassigned
ASV395	0	0.000105748	0	k__Bacteria; p__Actinobacteriota; c__Acidimicrobiia; o__Microtrichales; f__Ilumatobacteraceae; g__Ilumatobacter; s__
ASV396	7.04987e-05	0	0	k__Bacteria
ASV397	7.04987e-05	0	0	k__Bacteria; p__Firmicutes; c__Clostridia; o__Lachnospirales; f__Lachnospiraceae; g__Ruminococcus_gnavus_group; s__
ASV398	2.34996e-05	4.69991e-05	0	k__Bacteria; p__Proteobacteria; c__Alphaproteobacteria; o__Rhizobiales; f__Rhizobiales_Incertae_Sedis; g__Phreatobacter
ASV399	7.04987e-05	0	0	k__Bacteria
ASV400	0	9.39982e-05	0	Unassigned
ASV401	0	9.39982e-05	0	k__Bacteria; p__Firmicutes; c__Clostridia; o__Lachnospirales; f__Lachnospiraceae; g__Eubacterium_hallii_group; s__
ASV402	0	9.39982e-05	0	k__Bacteria
ASV403	0	9.39982e-05	0	k__Bacteria
ASV404	0	9.39982e-05	0	k__Bacteria; p__Firmicutes; c__Bacilli; o__Lactobacillales; f__Streptococcaceae; g__Streptococcus
ASV405	0	9.39982e-05	0	k__Bacteria
ASV406	0	9.39982e-05	0	k__Bacteria; p__Bacteroidota; c__Bacteroidia; o__Bacteroidales; f__Bacteroidaceae; g__Bacteroides; s__Bacteroides_caccae
ASV407	0	9.39982e-05	0	k__Bacteria; p__Acidobacteriota; c__Vicinamibacteria; o__Vicinamibacterales; f__; g__; s__
ASV408	0	9.39982e-05	0	k__Bacteria; p__Actinobacteriota; c__Actinobacteria; o__Corynebacteriales; f__Mycobacteriaceae; g__Mycobacterium
ASV409	0	9.39982e-05	0	k__Bacteria; p__Firmicutes; c__Clostridia; o__Oscillospirales; f__Oscillospiraceae; g__UCG-002; s__
ASV410	0	9.39982e-05	0	k__Bacteria; p__Firmicutes; c__Clostridia; o__Lachnospirales; f__Lachnospiraceae; g__Lachnoclostridium; s__
ASV411	0	9.39982e-05	0	k__Bacteria; p__Firmicutes; c__Negativicutes; o__Veillonellales-Selenomonadales; f__Selenomonadaceae; g__Megamonas; s__
ASV412	0	9.39982e-05	0	k__Bacteria; p__Firmicutes; c__Bacilli; o__Erysipelotrichales; f__Erysipelotrichaceae; g__Holdemanella; s__
ASV413	0	9.39982e-05	0	k__Bacteria
ASV414	0	9.39982e-05	0	Unassigned
ASV415	0	9.39982e-05	0	k__Bacteria; p__Proteobacteria; c__Alphaproteobacteria; o__Azospirillales; f__Azospirillaceae; g__Skermanella
ASV416	0	9.39982e-05	0	k__Bacteria; p__Acidobacteriota; c__Acidobacteriae; o__Subgroup_2; f__Subgroup_2; g__Subgroup_2; s__
ASV417	0	9.39982e-05	0	k__Bacteria
ASV418	0	9.39982e-05	0	k__Bacteria
ASV419	0	9.39982e-05	0	k__Bacteria; p__Proteobacteria; c__Gammaproteobacteria; o__Enterobacterales; f__Enterobacteriaceae; g__Kosakonia
ASV420	0	9.39982e-05	0	k__Bacteria
ASV421	0	9.39982e-05	0	Unassigned
ASV422	0	9.39982e-05	0	k__Bacteria
ASV423	0	9.39982e-05	0	k__Bacteria; p__Proteobacteria; c__Alphaproteobacteria; o__Rhizobiales; f__Methyloligellaceae; g__; s__
ASV424	0	9.39982e-05	0	k__Bacteria
ASV425	0	9.39982e-05	0	Unassigned
ASV426	0	9.39982e-05	0	Unassigned
ASV427	0	9.39982e-05	0	k__Bacteria
ASV428	0	9.39982e-05	0	k__Bacteria; p__Proteobacteria; c__Gammaproteobacteria; o__Burkholderiales; f__SC-I-84; g__SC-I-84; s__
ASV429	0	9.39982e-05	0	k__Bacteria; p__Firmicutes; c__Negativicutes; o__Veillonellales-Selenomonadales; f__Selenomonadaceae; g__Mitsuokella; s__
ASV430	0	9.39982e-05	0	k__Bacteria; p__Firmicutes; c__Clostridia; o__Peptostreptococcales-Tissierellales; f__Peptostreptococcaceae; g__Peptoclostridium; s__
ASV431	0	9.39982e-05	0	k__Bacteria; p__Proteobacteria; c__Alphaproteobacteria; o__Acetobacterales; f__Acetobacteraceae; g__Roseomonas
ASV432	0	9.39982e-05	0	k__Bacteria
ASV433	0	0	7.04987e-05	Unassigned
ASV434	0	0	7.04987e-05	k__Archaea; p__Aenigmarchaeota
ASV435	0	0	7.04987e-05	k__Bacteria; p__Firmicutes; c__Clostridia; o__Oscillospirales; f__Ruminococcaceae; g__Ruminococcaceae; s__
ASV436	0	0	7.04987e-05	k__Bacteria; p__Bacteroidota; c__Bacteroidia; o__Bacteroidales; f__Muribaculaceae; g__Muribaculaceae; s__
ASV437	0	0	7.04987e-05	Unassigned
ASV438	0	7.04987e-05	3.52493e-05	k__Bacteria; p__Firmicutes; c__Bacilli; o__Erysipelotrichales; f__Erysipelatoclostridiaceae; g__Erysipelotrichaceae_UCG-003; s__
ASV439	0	0	7.04987e-05	Unassigned
ASV440	0	0	7.04987e-05	Unassigned
ASV441	5.87489e-05	0	0	Unassigned
ASV442	5.87489e-05	0	0	k__Bacteria; p__Firmicutes; c__Clostridia; o__Lachnospirales; f__Lachnospiraceae; g__Roseburia; s__Roseburia_intestinalis
ASV443	7.04987e-05	0	0	k__Bacteria
ASV444	8.22484e-05	0	0	k__Bacteria
ASV445	0	0	7.04987e-05	k__Bacteria; p__Actinobacteriota; c__Actinobacteria; o__Bifidobacteriales; f__Bifidobacteriaceae; g__Bifidobacterium; s__Bifidobacterium_pseudolongum
ASV446	0	9.39982e-05	0	k__Bacteria; p__Actinobacteriota; c__Thermoleophilia; o__Gaiellales; f__; g__; s__bacterium_Ellin6515
ASV447	0	9.39982e-05	0	k__Bacteria; p__Actinobacteriota
ASV448	0	9.39982e-05	0	k__Bacteria; p__Nitrospirota; c__Nitrospiria; o__Nitrospirales; f__Nitrospiraceae; g__Nitrospira
ASV449	0	9.39982e-05	0	k__Bacteria; p__Actinobacteriota; c__Actinobacteria; o__Micrococcales; f__Dermacoccaceae; g__Kytococcus
ASV450	0	9.39982e-05	0	k__Bacteria; p__Actinobacteriota; c__Acidimicrobiia; o__; f__; g__; s__
ASV451	0	9.39982e-05	0	k__Bacteria; p__Gemmatimonadota; c__Gemmatimonadetes; o__Gemmatimonadales; f__Gemmatimonadaceae; g__
ASV452	0	9.39982e-05	0	k__Bacteria; p__Firmicutes; c__Bacilli; o__Bacillales; f__Bacillaceae; g__Bacillus
ASV453	0	9.39982e-05	0	k__Bacteria; p__Firmicutes; c__Clostridia; o__Oscillospirales; f__Oscillospiraceae; g__; s__
ASV454	0	9.39982e-05	0	k__Bacteria; p__Proteobacteria; c__Gammaproteobacteria; o__Steroidobacterales; f__Steroidobacteraceae; g__Steroidobacteraceae; s__
ASV455	0	9.39982e-05	0	k__Bacteria; p__Proteobacteria; c__Gammaproteobacteria; o__KF-JG30-C25; f__KF-JG30-C25; g__KF-JG30-C25; s__
ASV456	0	9.39982e-05	0	k__Bacteria; p__Gemmatimonadota; c__Gemmatimonadetes; o__Gemmatimonadales; f__Gemmatimonadaceae; g__; s__
ASV457	0	9.39982e-05	0	k__Bacteria; p__Firmicutes; c__Bacilli; o__Lactobacillales; f__Carnobacteriaceae; g__Atopostipes; s__
ASV458	0	9.39982e-05	0	k__Bacteria; p__Proteobacteria; c__Gammaproteobacteria; o__Gammaproteobacteria_Incertae_Sedis; f__Unknown_Family; g__Acidibacter; s__
ASV459	0	8.22484e-05	0	k__Bacteria; p__Acidobacteriota; c__Acidobacteriae; o__Subgroup_2; f__Subgroup_2; g__Subgroup_2; s__
ASV460	0	8.22484e-05	0	k__Bacteria
ASV461	0	8.22484e-05	0	k__Bacteria; p__Proteobacteria; c__Gammaproteobacteria; o__Xanthomonadales; f__Rhodanobacteraceae
ASV462	0	8.22484e-05	0	k__Bacteria; p__Actinobacteriota; c__Actinobacteria; o__Corynebacteriales; f__Corynebacteriaceae; g__Corynebacterium
ASV463	0	8.22484e-05	0	k__Bacteria; p__Acidobacteriota; c__Acidobacteriae; o__Solibacterales; f__Solibacteraceae; g__Candidatus_Solibacter; s__
ASV464	0	8.22484e-05	0	k__Bacteria
ASV465	0	8.22484e-05	0	k__Bacteria; p__Proteobacteria; c__Gammaproteobacteria; o__Steroidobacterales; f__Woeseiaceae; g__Woeseia; s__
ASV466	0	8.22484e-05	0	k__Bacteria; p__Acidobacteriota; c__Acidobacteriae; o__Acidobacteriales; f__Acidobacteriaceae_(Subgroup_1); g__; s__
ASV467	0	8.22484e-05	0	k__Bacteria; p__Acidobacteriota; c__Acidobacteriae; o__Bryobacterales; f__Bryobacteraceae; g__Bryobacter; s__
ASV468	0	8.22484e-05	0	k__Bacteria; p__Proteobacteria; c__Gammaproteobacteria; o__Xanthomonadales; f__Rhodanobacteraceae; g__Aquimonas; s__
ASV469	0	8.22484e-05	0	k__Bacteria; p__Acidobacteriota; c__Acidobacteriae; o__Subgroup_2; f__Subgroup_2; g__Subgroup_2; s__
ASV470	0	8.22484e-05	0	k__Bacteria; p__Proteobacteria; c__Gammaproteobacteria; o__Xanthomonadales; f__Rhodanobacteraceae; g__Dokdonella
ASV471	0	8.22484e-05	0	k__Bacteria; p__Acidobacteriota; c__Vicinamibacteria; o__Vicinamibacterales; f__; g__; s__
ASV472	0	8.22484e-05	0	k__Bacteria; p__Bacteroidota; c__Bacteroidia; o__Bacteroidales; f__Barnesiellaceae; g__Barnesiella; s__
ASV473	0	8.22484e-05	0	k__Bacteria
ASV474	0	8.22484e-05	0	k__Bacteria
ASV475	0	8.22484e-05	0	k__Bacteria; p__Acidobacteriota; c__Acidobacteriae; o__Acidobacteriales
ASV476	0	8.22484e-05	0	Unassigned
ASV477	0	8.22484e-05	0	k__Bacteria; p__Acidobacteriota; c__Acidobacteriae; o__Acidobacteriales; f__; g__; s__
ASV478	0	8.22484e-05	0	k__Bacteria; p__Firmicutes; c__Bacilli; o__Lactobacillales; f__Enterococcaceae; g__Enterococcus
ASV479	0	8.22484e-05	0	k__Bacteria; p__Acidobacteriota; c__Acidobacteriae; o__Acidobacteriales; f__; g__; s__
ASV480	0	8.22484e-05	0	k__Bacteria; p__Bacteroidota; c__Bacteroidia; o__Bacteroidales; f__Rikenellaceae; g__Alistipes; s__
ASV481	0	8.22484e-05	0	k__Bacteria; p__Chloroflexi; c__AD3; o__AD3; f__AD3; g__AD3; s__
ASV482	0	8.22484e-05	0	Unassigned
ASV483	0	8.22484e-05	0	Unassigned
ASV484	0	8.22484e-05	0	Unassigned
ASV485	0	8.22484e-05	0	Unassigned
ASV486	0	8.22484e-05	0	k__Bacteria
ASV487	0	8.22484e-05	0	k__Bacteria; p__Bacteroidota; c__Bacteroidia; o__Bacteroidales; f__Prevotellaceae; g__Prevotella; s__Prevotella_copri
ASV488	0	8.22484e-05	0	Unassigned
ASV489	0	8.22484e-05	0	k__Bacteria
ASV490	0	8.22484e-05	0	Unassigned
ASV491	0	8.22484e-05	0	Unassigned
ASV492	0	8.22484e-05	0	k__Bacteria; p__Proteobacteria; c__Alphaproteobacteria; o__Reyranellales; f__Reyranellaceae; g__Reyranella; s__
ASV493	0	8.22484e-05	0	k__Bacteria; p__Firmicutes; c__Clostridia; o__Oscillospirales; f__Eubacterium_coprostanoligenes_group; g__Eubacterium_coprostanoligenes_group; s__
ASV494	0	8.22484e-05	0	k__Bacteria
ASV495	0	8.22484e-05	0	k__Bacteria; p__Proteobacteria; c__Gammaproteobacteria; o__Burkholderiales; f__Comamonadaceae; g__Variovorax
ASV496	7.04987e-05	0	0	k__Bacteria; p__Proteobacteria; c__Alphaproteobacteria; o__Rhizobiales; f__Rhizobiaceae; g__Allorhizobium-Neorhizobium-Pararhizobium-Rhizobium
ASV497	3.52493e-05	3.52493e-05	0	Unassigned
ASV498	4.69991e-05	0	0	Unassigned
ASV499	0	0	7.04987e-05	k__Bacteria
ASV500	0	0	8.22484e-05	k__Bacteria; p__Proteobacteria; c__Gammaproteobacteria; o__Alteromonadales; f__Alteromonadaceae; g__Alishewanella
ASV501	0	0	8.22484e-05	Unassigned
ASV502	2.34996e-05	0	3.52493e-05	k__Bacteria; p__Proteobacteria; c__Alphaproteobacteria; o__Rhizobiales; f__Devosiaceae; g__Devosia
ASV503	0	0	5.87489e-05	k__Bacteria
ASV504	0	0	8.22484e-05	k__Bacteria; p__Fusobacteriota; c__Fusobacteriia; o__Fusobacteriales; f__Fusobacteriaceae; g__Cetobacterium; s__
ASV505	0	0	5.87489e-05	k__Bacteria; p__Proteobacteria; c__Gammaproteobacteria; o__Pseudomonadales; f__Moraxellaceae; g__Acinetobacter
ASV506	0	0	5.87489e-05	k__Bacteria; p__Proteobacteria; c__Gammaproteobacteria; o__Pseudomonadales; f__Pseudomonadaceae; g__Pseudomonas
ASV507	0	0	5.87489e-05	k__Bacteria; p__Proteobacteria; c__Alphaproteobacteria; o__Rhizobiales; f__Hyphomicrobiaceae; g__Pedomicrobium; s__
ASV508	0	0	5.87489e-05	Unassigned
ASV509	0	0	7.04987e-05	Unassigned
ASV510	0	0	5.87489e-05	k__Bacteria; p__Proteobacteria; c__Alphaproteobacteria; o__Rhizobiales; f__Methyloligellaceae; g__; s__
ASV511	0	0	5.87489e-05	k__Bacteria; p__Actinobacteriota; c__Thermoleophilia; o__Solirubrobacterales; f__67-14; g__67-14; s__
ASV512	5.87489e-05	0	0	k__Bacteria; p__Firmicutes; c__Negativicutes; o__Veillonellales-Selenomonadales; f__Selenomonadaceae; g__Mitsuokella; s__
ASV513	0	0	5.87489e-05	k__Bacteria; p__Proteobacteria; c__Gammaproteobacteria; o__Burkholderiales; f__Comamonadaceae
ASV514	5.87489e-05	0	0	k__Bacteria; p__Bacteroidota; c__Bacteroidia; o__Bacteroidales; f__Bacteroidaceae; g__Bacteroides; s__Bacteroides_massiliensis
ASV515	0	8.22484e-05	0	k__Bacteria; p__Proteobacteria; c__Gammaproteobacteria; o__Burkholderiales; f__TRA3-20; g__TRA3-20; s__
ASV516	0	8.22484e-05	0	k__Bacteria; p__Myxococcota; c__Myxococcia; o__Myxococcales; f__Anaeromyxobacteraceae; g__Anaeromyxobacter; s__
ASV517	4.69991e-05	0	0	k__Bacteria
ASV518	0	8.22484e-05	0	k__Bacteria; p__Actinobacteriota; c__Actinobacteria; o__Frankiales; f__Nakamurellaceae; g__Nakamurella; s__
ASV519	0	8.22484e-05	0	k__Bacteria; p__Firmicutes; c__Clostridia; o__Oscillospirales; f__Ruminococcaceae; g__Ruminococcus; s__bacterium_ic1277
ASV520	0	8.22484e-05	0	k__Bacteria; p__Desulfobacterota; c__Desulfovibrionia; o__Desulfovibrionales; f__Desulfovibrionaceae; g__Desulfovibrio; s__Desulfovibrio_legallii
ASV521	0	8.22484e-05	0	k__Bacteria; p__Proteobacteria; c__Alphaproteobacteria; o__Tistrellales; f__Geminicoccaceae; g__Candidatus_Alysiosphaera; s__
ASV522	0	8.22484e-05	0	k__Bacteria; p__Proteobacteria; c__Gammaproteobacteria; o__Burkholderiales; f__Burkholderiaceae; g__Burkholderia-Caballeronia-Paraburkholderia
ASV523	0	8.22484e-05	0	k__Bacteria; p__Proteobacteria; c__Alphaproteobacteria; o__Azospirillales; f__Azospirillaceae; g__Skermanella
ASV524	0	8.22484e-05	0	k__Bacteria; p__Proteobacteria; c__Gammaproteobacteria; o__Burkholderiales; f__SC-I-84; g__SC-I-84
ASV525	0	8.22484e-05	0	k__Bacteria; p__Proteobacteria; c__Alphaproteobacteria; o__Caulobacterales; f__Hyphomonadaceae; g__SWB02; s__
ASV526	4.69991e-05	0	0	Unassigned
ASV527	0	8.22484e-05	0	k__Bacteria; p__Acidobacteriota; c__Subgroup_22; o__Subgroup_22; f__Subgroup_22; g__Subgroup_22; s__
ASV528	0	8.22484e-05	0	k__Bacteria; p__Proteobacteria; c__Gammaproteobacteria; o__Burkholderiales; f__Oxalobacteraceae; g__Massilia
ASV529	0	8.22484e-05	0	k__Bacteria; p__Proteobacteria; c__Alphaproteobacteria; o__Rhizobiales; f__Xanthobacteraceae
ASV530	0	8.22484e-05	0	k__Bacteria; p__Actinobacteriota; c__Thermoleophilia; o__Gaiellales; f__Gaiellaceae; g__Gaiella; s__
ASV531	0	8.22484e-05	0	k__Bacteria
ASV532	0	7.04987e-05	0	k__Bacteria; p__Proteobacteria; c__Gammaproteobacteria; o__Xanthomonadales; f__Xanthomonadaceae; g__Stenotrophomonas
ASV533	0	7.04987e-05	0	k__Bacteria; p__Proteobacteria; c__Alphaproteobacteria; o__Acetobacterales; f__Acetobacteraceae; g__
ASV534	0	7.04987e-05	0	k__Bacteria; p__Proteobacteria; c__Gammaproteobacteria; o__Burkholderiales; f__Comamonadaceae
ASV535	0	7.04987e-05	0	k__Bacteria
ASV536	0	8.22484e-05	0	k__Bacteria; p__Firmicutes; c__Clostridia; o__Oscillospirales; f__Oscillospiraceae; g__Intestinimonas; s__
ASV537	0	5.87489e-05	0	Unassigned
ASV538	0	5.87489e-05	0	Unassigned
ASV539	0	7.04987e-05	0	Unassigned
ASV540	0	7.04987e-05	0	k__Bacteria; p__Proteobacteria; c__Gammaproteobacteria; o__Orbales; f__Orbaceae; g__Gilliamella
ASV541	0	8.22484e-05	0	k__Bacteria; p__Proteobacteria; c__Gammaproteobacteria; o__Pseudomonadales; f__Moraxellaceae; g__Acinetobacter
ASV542	0	7.04987e-05	0	k__Bacteria; p__Gemmatimonadota; c__Gemmatimonadetes; o__Gemmatimonadales; f__Gemmatimonadaceae; g__; s__
ASV543	0	7.04987e-05	0	Unassigned
ASV544	0	8.22484e-05	0	Unassigned
ASV545	0	8.22484e-05	0	k__Bacteria; p__Proteobacteria; c__Gammaproteobacteria; o__Burkholderiales; f__Sutterellaceae; g__Sutterella; s__
ASV546	0	9.39982e-05	0	k__Bacteria; p__Firmicutes; c__Bacilli; o__Staphylococcales; f__Staphylococcaceae; g__Staphylococcus
ASV547	0	7.04987e-05	0	k__Bacteria; p__Firmicutes; c__Negativicutes; o__Veillonellales-Selenomonadales; f__Veillonellaceae; g__Dialister
ASV548	0	5.87489e-05	0	k__Bacteria; p__Firmicutes; c__Clostridia; o__Oscillospirales; f__Ruminococcaceae; g__Subdoligranulum; s__
ASV549	0	5.87489e-05	0	k__Bacteria; p__Proteobacteria; c__Gammaproteobacteria; o__Burkholderiales; f__Nitrosomonadaceae; g__Ellin6067; s__
ASV550	0	5.87489e-05	0	k__Bacteria; p__Actinobacteriota; c__Acidimicrobiia; o__Microtrichales
ASV551	0	7.04987e-05	0	k__Bacteria; p__Proteobacteria; c__Alphaproteobacteria; o__Rhizobiales; f__Xanthobacteraceae
ASV552	0	5.87489e-05	0	k__Bacteria; p__Acidobacteriota; c__Vicinamibacteria; o__Vicinamibacterales; f__; g__; s__
ASV553	0	5.87489e-05	0	Unassigned
ASV554	0	9.39982e-05	0	k__Bacteria; p__Proteobacteria; c__Alphaproteobacteria; o__Rhodobacterales; f__Rhodobacteraceae
ASV555	0	7.04987e-05	0	k__Bacteria; p__Proteobacteria; c__Alphaproteobacteria; o__Rhizobiales; f__Xanthobacteraceae
ASV556	0	8.22484e-05	0	k__Bacteria; p__Proteobacteria; c__Gammaproteobacteria; o__Pseudomonadales; f__Moraxellaceae; g__Acinetobacter
ASV557	0	5.87489e-05	0	k__Bacteria; p__Actinobacteriota; c__Actinobacteria; o__Micrococcales; f__Microbacteriaceae; g__Agromyces
ASV558	0	7.04987e-05	0	Unassigned
ASV559	0	7.04987e-05	0	k__Bacteria; p__Bacteroidota; c__Bacteroidia; o__Bacteroidales; f__Muribaculaceae; g__Muribaculaceae; s__
ASV560	0	5.87489e-05	0	k__Bacteria; p__Firmicutes; c__Clostridia; o__Lachnospirales; f__Lachnospiraceae
ASV561	0	5.87489e-05	0	k__Bacteria; p__Firmicutes; c__Bacilli; o__Lactobacillales; f__Leuconostocaceae; g__Leuconostoc
ASV562	0	7.04987e-05	0	Unassigned
ASV563	0	7.04987e-05	0	k__Bacteria; p__Acidobacteriota; c__Blastocatellia; o__Pyrinomonadales; f__Pyrinomonadaceae; g__RB41; s__
ASV564	0	5.87489e-05	0	k__Bacteria; p__Bacteroidota; c__Bacteroidia; o__Bacteroidales; f__Bacteroidaceae; g__Bacteroides; s__Bacteroides_graminisolvens
ASV565	0	7.04987e-05	0	k__Bacteria; p__Nitrospirota; c__Nitrospiria; o__Nitrospirales; f__Nitrospiraceae; g__Nitrospira; s__Nitrospira_defluvii
ASV566	0	8.22484e-05	0	Unassigned
ASV567	0	8.22484e-05	0	k__Bacteria; p__Acidobacteriota; c__Acidobacteriae; o__Acidobacteriales; f__Acidobacteriaceae_(Subgroup_1); g__Granulicella
ASV568	0	7.04987e-05	0	k__Bacteria
ASV569	0	7.04987e-05	0	k__Bacteria
ASV570	0	5.87489e-05	0	Unassigned
ASV571	0	5.87489e-05	0	k__Bacteria; p__Firmicutes; c__Clostridia; o__Lachnospirales; f__Lachnospiraceae
ASV572	0	7.04987e-05	0	k__Bacteria
ASV573	0	5.87489e-05	0	k__Bacteria
ASV574	0	7.04987e-05	0	Unassigned
ASV575	0	8.22484e-05	0	k__Bacteria; p__Firmicutes; c__Bacilli; o__Lactobacillales; f__Enterococcaceae; g__Enterococcus
ASV576	0	5.87489e-05	0	Unassigned
ASV577	0	5.87489e-05	0	k__Bacteria
ASV578	0	5.87489e-05	0	k__Bacteria; p__Firmicutes; c__Bacilli; o__Lactobacillales; f__Lactobacillaceae; g__Pediococcus
ASV579	0	5.87489e-05	0	Unassigned
ASV580	0	7.04987e-05	0	k__Bacteria; p__Actinobacteriota; c__Thermoleophilia; o__Solirubrobacterales; f__Solirubrobacteraceae; g__Solirubrobacter; s__
ASV581	0	5.87489e-05	0	Unassigned
ASV582	0	8.22484e-05	0	k__Bacteria; p__Proteobacteria; c__Alphaproteobacteria; o__Rhizobiales; f__Xanthobacteraceae; g__Bradyrhizobium
ASV583	0	5.87489e-05	0	k__Bacteria; p__Proteobacteria; c__Gammaproteobacteria; o__Burkholderiales; f__Oxalobacteraceae; g__Massilia
ASV584	0	7.04987e-05	0	k__Bacteria; p__Methylomirabilota; c__Methylomirabilia; o__Rokubacteriales; f__Rokubacteriales; g__Rokubacteriales; s__
ASV585	0	7.04987e-05	0	k__Bacteria
ASV586	0	5.87489e-05	0	k__Bacteria; p__Actinobacteriota; c__Acidimicrobiia; o__Microtrichales; f__Microtrichaceae; g__IMCC26207; s__
ASV587	0	8.22484e-05	0	k__Bacteria
ASV588	0	9.39982e-05	0	k__Bacteria; p__Planctomycetota; c__Planctomycetes; o__Pirellulales; f__Pirellulaceae; g__Pirellula
ASV589	0	5.87489e-05	0	k__Bacteria
ASV590	0	7.04987e-05	0	k__Bacteria; p__Actinobacteriota; c__Actinobacteria; o__Bifidobacteriales; f__Bifidobacteriaceae; g__Gardnerella; s__Gardnerella_vaginalis
ASV591	0	9.39982e-05	0	k__Bacteria
ASV592	0	5.87489e-05	0	Unassigned
ASV593	0	8.22484e-05	0	Unassigned
ASV594	0	5.87489e-05	0	k__Bacteria
ASV595	0	5.87489e-05	0	k__Bacteria
ASV596	0	5.87489e-05	0	Unassigned
ASV597	0	8.22484e-05	0	k__Bacteria
ASV598	0	7.04987e-05	0	k__Bacteria; p__Actinobacteriota; c__Thermoleophilia; o__Gaiellales; f__Gaiellaceae; g__Gaiella; s__
ASV599	0	5.87489e-05	0	k__Bacteria; p__Firmicutes; c__Clostridia; o__Lachnospirales; f__Lachnospiraceae; g__Ruminococcus_gnavus_group; s__
ASV600	0	5.87489e-05	0	k__Bacteria; p__Proteobacteria; c__Gammaproteobacteria; o__Xanthomonadales; f__Rhodanobacteraceae; g__Rhodanobacter; s__
ASV601	0	5.87489e-05	0	k__Bacteria; p__Firmicutes; c__Clostridia; o__Lachnospirales; f__Lachnospiraceae; g__Blautia
ASV602	0	5.87489e-05	0	k__Bacteria
ASV603	0	5.87489e-05	0	k__Bacteria; p__Actinobacteriota; c__Acidimicrobiia; o__Microtrichales; f__Ilumatobacteraceae; g__Ilumatobacter; s__
ASV604	0	7.04987e-05	0	k__Bacteria
ASV605	0	5.87489e-05	0	k__Bacteria
ASV606	0	0	5.87489e-05	k__Bacteria; p__Firmicutes; c__Clostridia; o__Lachnospirales; f__Lachnospiraceae; g__Anaerostipes; s__
ASV607	0	0	4.69991e-05	k__Bacteria; p__Firmicutes; c__Clostridia; o__Lachnospirales; f__Lachnospiraceae; g__Eubacterium_xylanophilum_group; s__
ASV608	0	0	4.69991e-05	k__Bacteria
ASV609	0	0	5.87489e-05	Unassigned
ASV610	4.69991e-05	0	0	k__Bacteria; p__Proteobacteria; c__Gammaproteobacteria; o__Oceanospirillales; f__Alcanivoracaceae; g__Ketobacter; s__
ASV611	4.69991e-05	0	0	Unassigned
ASV612	4.69991e-05	0	0	k__Bacteria; p__Bacteroidota; c__Bacteroidia; o__Bacteroidales; f__Rikenellaceae; g__Alistipes; s__
ASV613	4.69991e-05	0	0	Unassigned
ASV614	4.69991e-05	0	0	k__Bacteria; p__Desulfobacterota; c__Desulfovibrionia; o__Desulfovibrionales; f__Desulfovibrionaceae; g__; s__
ASV615	2.34996e-05	4.69991e-05	0	k__Bacteria; p__Acidobacteriota; c__Acidobacteriae; o__Bryobacterales; f__Bryobacteraceae; g__Bryobacter; s__
ASV616	4.69991e-05	0	0	k__Bacteria
ASV617	4.69991e-05	0	0	k__Bacteria; p__Actinobacteriota; c__Acidimicrobiia; o__Microtrichales; f__Iamiaceae; g__Iamia; s__Aquihabitans_daechungensis
ASV618	4.69991e-05	0	0	k__Bacteria
ASV619	4.69991e-05	0	0	k__Bacteria
ASV620	4.69991e-05	0	0	k__Bacteria
ASV621	4.69991e-05	0	0	k__Bacteria
ASV622	0	0	4.69991e-05	Unassigned
ASV623	2.34996e-05	0	2.34996e-05	k__Bacteria; p__Proteobacteria; c__Alphaproteobacteria; o__Rhizobiales; f__Beijerinckiaceae; g__Methylobacterium-Methylorubrum
ASV624	4.69991e-05	0	0	Unassigned
ASV625	0	0	5.87489e-05	Unassigned
ASV626	0	7.04987e-05	0	k__Bacteria; p__Proteobacteria; c__Gammaproteobacteria; o__Burkholderiales; f__A21b; g__A21b; s__
ASV627	0	0	4.69991e-05	Unassigned
ASV628	0	0	4.69991e-05	k__Bacteria; p__Proteobacteria; c__Gammaproteobacteria
ASV629	0	0	7.04987e-05	k__Bacteria; p__Bacteroidota; c__Bacteroidia; o__Bacteroidales; f__Muribaculaceae; g__Muribaculaceae; s__mouse_gut
ASV630	0	2.34996e-05	3.52493e-05	k__Bacteria; p__Desulfobacterota; c__Desulfovibrionia; o__Desulfovibrionales; f__Desulfovibrionaceae
ASV631	0	0	5.87489e-05	Unassigned
ASV632	0	0	5.87489e-05	k__Bacteria
ASV633	0	4.69991e-05	3.52493e-05	k__Bacteria; p__Verrucomicrobiota; c__Verrucomicrobiae; o__Pedosphaerales; f__Pedosphaeraceae; g__SH3-11; s__
ASV634	0	0	4.69991e-05	Unassigned
ASV635	0	0	4.69991e-05	k__Bacteria; p__Proteobacteria; c__Gammaproteobacteria; o__Burkholderiales; f__Nitrosomonadaceae; g__mle1-7; s__
ASV636	0	0	5.87489e-05	k__Bacteria; p__Proteobacteria; c__Gammaproteobacteria; o__Orbales; f__Orbaceae; g__Gilliamella
ASV637	0	0	5.87489e-05	k__Bacteria
ASV638	0	0	4.69991e-05	k__Bacteria
ASV639	0	0	4.69991e-05	Unassigned
ASV640	0	4.69991e-05	2.34996e-05	k__Bacteria; p__Actinobacteriota; c__Acidimicrobiia; o__Microtrichales; f__; g__; s__
ASV641	4.69991e-05	0	0	Unassigned
ASV642	0	0	7.04987e-05	k__Bacteria; p__Firmicutes; c__Clostridia; o__Lachnospirales; f__Lachnospiraceae; g__Eubacterium_eligens_group; s__
ASV643	4.69991e-05	0	0	k__Bacteria
ASV644	0	7.04987e-05	0	k__Bacteria; p__Gemmatimonadota; c__Gemmatimonadetes; o__Gemmatimonadales; f__Gemmatimonadaceae; g__Gemmatimonas; s__
ASV645	0	9.39982e-05	0	k__Bacteria; p__Gemmatimonadota; c__Gemmatimonadetes; o__Gemmatimonadales; f__Gemmatimonadaceae; g__Gemmatimonas; s__
ASV646	0	9.39982e-05	0	k__Bacteria; p__Myxococcota; c__Polyangia; o__Polyangiales; f__Phaselicystidaceae; g__Phaselicystis; s__
ASV647	0	5.87489e-05	0	k__Bacteria; p__Patescibacteria; c__Saccharimonadia; o__Saccharimonadales; f__Saccharimonadales; g__Saccharimonadales; s__
ASV648	0	5.87489e-05	0	Unassigned
ASV649	0	7.04987e-05	0	k__Bacteria; p__Proteobacteria; c__Gammaproteobacteria; o__Oceanospirillales; f__Pseudohongiellaceae; g__Pseudohongiella; s__Betaproteobacteria_bacterium
ASV650	0	8.22484e-05	0	k__Bacteria; p__Desulfobacterota; c__Desulfuromonadia; o__Geobacterales; f__Geobacteraceae; g__
ASV651	0	5.87489e-05	0	k__Bacteria; p__Nitrospirota; c__Nitrospiria; o__Nitrospirales; f__Nitrospiraceae; g__Nitrospira; s__Nitrospira_bacterium
ASV652	0	7.04987e-05	0	Unassigned
ASV653	0	5.87489e-05	0	k__Bacteria; p__Acidobacteriota; c__Vicinamibacteria; o__Subgroup_17; f__Subgroup_17; g__Subgroup_17; s__
ASV654	0	5.87489e-05	0	Unassigned
ASV655	0	5.87489e-05	0	k__Bacteria
ASV656	0	7.04987e-05	0	k__Bacteria; p__Patescibacteria; c__Saccharimonadia; o__Saccharimonadales; f__Saccharimonadales; g__Saccharimonadales; s__
ASV657	0	5.87489e-05	0	k__Bacteria; p__Acidobacteriota; c__Vicinamibacteria; o__Vicinamibacterales; f__; g__; s__
ASV658	0	7.04987e-05	0	k__Bacteria; p__MBNT15; c__MBNT15; o__MBNT15; f__MBNT15; g__MBNT15; s__delta_proteobacterium
ASV659	0	7.04987e-05	0	k__Bacteria
ASV660	0	5.87489e-05	0	k__Bacteria; p__Planctomycetota; c__Planctomycetes; o__Pirellulales; f__Pirellulaceae; g__Pirellula; s__planctomycete_str.
ASV661	0	5.87489e-05	0	k__Bacteria; p__Desulfobacterota; c__Desulfovibrionia; o__Desulfovibrionales; f__Desulfovibrionaceae; g__; s__
ASV662	0	5.87489e-05	0	k__Bacteria; p__Proteobacteria; c__Gammaproteobacteria; o__Xanthomonadales; f__Xanthomonadaceae; g__Lysobacter; s__Lysobacter_sp.
ASV663	0	9.39982e-05	0	k__Bacteria; p__Myxococcota; c__Polyangia; o__Polyangiales; f__Polyangiaceae; g__Pajaroellobacter; s__
ASV664	0	7.04987e-05	0	k__Bacteria; p__Proteobacteria; c__Alphaproteobacteria; o__Elsterales; f__; g__; s__
ASV665	0	7.04987e-05	0	k__Bacteria; p__Acidobacteriota; c__Vicinamibacteria; o__Vicinamibacterales; f__Vicinamibacteraceae; g__Vicinamibacteraceae; s__
ASV666	0	7.04987e-05	0	k__Bacteria; p__Proteobacteria; c__Gammaproteobacteria; o__Xanthomonadales; f__Rhodanobacteraceae; g__Rhodanobacter; s__
ASV667	0	5.87489e-05	0	k__Bacteria; p__Actinobacteriota; c__Acidimicrobiia; o__Microtrichales; f__; g__; s__
ASV668	0	9.39982e-05	0	k__Bacteria; p__Acidobacteriota; c__Acidobacteriae; o__Subgroup_2; f__Subgroup_2; g__Subgroup_2; s__
ASV669	0	5.87489e-05	0	k__Bacteria; p__Proteobacteria; c__Gammaproteobacteria; o__Xanthomonadales; f__Xanthomonadaceae; g__Pseudoxanthomonas
ASV670	0	7.04987e-05	0	k__Bacteria; p__Proteobacteria; c__Alphaproteobacteria; o__Rhizobiales; f__Methyloligellaceae; g__Methyloligellaceae; s__
ASV671	0	7.04987e-05	0	k__Bacteria; p__Actinobacteriota; c__Actinobacteria; o__Micrococcales; f__Intrasporangiaceae
ASV672	0	8.22484e-05	0	k__Bacteria; p__Proteobacteria; c__Alphaproteobacteria; o__Elsterales; f__; g__; s__
ASV673	0	9.39982e-05	0	k__Bacteria; p__Myxococcota; c__Polyangia; o__Polyangiales; f__Polyangiaceae; g__Pajaroellobacter; s__
ASV674	0	9.39982e-05	0	Unassigned
ASV675	0	7.04987e-05	0	k__Bacteria; p__Proteobacteria; c__Gammaproteobacteria; o__Oceanospirillales; f__Halomonadaceae; g__Halomonas
ASV676	0	8.22484e-05	0	k__Bacteria; p__Actinobacteriota; c__Thermoleophilia; o__Solirubrobacterales; f__Solirubrobacteraceae; g__Solirubrobacter; s__
ASV677	0	7.04987e-05	0	k__Bacteria; p__Proteobacteria; c__Alphaproteobacteria; o__Dongiales; f__Dongiaceae; g__Dongia; s__
ASV678	0	4.69991e-05	0	k__Bacteria; p__Firmicutes; c__Clostridia; o__Clostridia_UCG-014; f__Clostridia_UCG-014; g__Clostridia_UCG-014; s__
ASV679	0	5.87489e-05	0	Unassigned
ASV680	0	7.04987e-05	0	k__Bacteria; p__Myxococcota; c__Polyangia; o__Polyangiales; f__Polyangiaceae; g__Pajaroellobacter; s__
ASV681	0	4.69991e-05	0	k__Bacteria; p__Proteobacteria; c__Gammaproteobacteria; o__Burkholderiales; f__Comamonadaceae
ASV682	0	4.69991e-05	0	Unassigned
ASV683	0	5.87489e-05	0	Unassigned
ASV684	0	4.69991e-05	0	k__Bacteria; p__Proteobacteria; c__Gammaproteobacteria; o__Burkholderiales; f__TRA3-20; g__TRA3-20; s__
ASV685	0	5.87489e-05	0	k__Bacteria; p__Actinobacteriota; c__Acidimicrobiia; o__Microtrichales
ASV686	0	4.69991e-05	0	k__Bacteria
ASV687	0	5.87489e-05	0	k__Bacteria; p__Proteobacteria; c__Gammaproteobacteria; o__Burkholderiales; f__SC-I-84; g__SC-I-84; s__
ASV688	0	4.69991e-05	0	k__Bacteria; p__Firmicutes; c__Bacilli; o__Bacillales; f__Planococcaceae; g__Sporosarcina
ASV689	0	7.04987e-05	0	Unassigned
ASV690	0	4.69991e-05	0	Unassigned
ASV691	0	7.04987e-05	0	k__Bacteria; p__Firmicutes; c__Negativicutes; o__Acidaminococcales; f__Acidaminococcaceae; g__Phascolarctobacterium; s__
ASV692	0	4.69991e-05	0	k__Bacteria; p__Acidobacteriota; c__Acidobacteriae; o__Acidobacteriales; f__Acidobacteriaceae_(Subgroup_1); g__Granulicella; s__
ASV693	0	4.69991e-05	0	k__Bacteria; p__Proteobacteria; c__Gammaproteobacteria; o__Burkholderiales; f__TRA3-20; g__TRA3-20; s__
ASV694	0	4.69991e-05	0	k__Bacteria
ASV695	0	5.87489e-05	0	k__Bacteria; p__Firmicutes; c__Bacilli; o__Lactobacillales; f__Lactobacillaceae; g__Lactobacillus
ASV696	0	4.69991e-05	0	Unassigned
ASV697	0	7.04987e-05	0	k__Bacteria; p__Gemmatimonadota; c__Gemmatimonadetes; o__Gemmatimonadales; f__Gemmatimonadaceae; g__Roseisolibacter; s__
ASV698	0	4.69991e-05	0	k__Bacteria
ASV699	0	7.04987e-05	0	k__Bacteria; p__Proteobacteria; c__Alphaproteobacteria; o__Rhizobiales; f__Beijerinckiaceae
ASV700	0	5.87489e-05	0	Unassigned
ASV701	0	4.69991e-05	0	k__Bacteria; p__Proteobacteria; c__Gammaproteobacteria; o__Xanthomonadales; f__Xanthomonadaceae
ASV702	0	4.69991e-05	0	k__Bacteria; p__Proteobacteria; c__Gammaproteobacteria; o__Acidithiobacillales; f__Acidithiobacillaceae; g__KCM-B-112; s__
ASV703	0	4.69991e-05	0	k__Bacteria; p__Acidobacteriota; c__Acidobacteriae; o__Bryobacterales; f__Bryobacteraceae; g__Bryobacter; s__
ASV704	0	4.69991e-05	0	k__Bacteria; p__Acidobacteriota; c__Acidobacteriae; o__Solibacterales; f__Solibacteraceae; g__Candidatus_Solibacter; s__
ASV705	0	7.04987e-05	0	k__Bacteria; p__Actinobacteriota; c__Actinobacteria; o__Corynebacteriales; f__Corynebacteriaceae; g__Corynebacterium
ASV706	0	4.69991e-05	0	k__Bacteria
ASV707	0	4.69991e-05	0	Unassigned
ASV708	0	4.69991e-05	0	k__Bacteria; p__Proteobacteria; c__Alphaproteobacteria; o__Rhizobiales; f__Beijerinckiaceae; g__Methylocapsa
ASV709	0	7.04987e-05	0	k__Bacteria
ASV710	0	5.87489e-05	0	Unassigned
ASV711	0	4.69991e-05	0	k__Bacteria
ASV712	0	8.22484e-05	0	Unassigned
ASV713	0	7.04987e-05	0	k__Bacteria; p__Proteobacteria; c__Alphaproteobacteria; o__Elsterales; f__; g__; s__
ASV714	0	5.87489e-05	0	k__Bacteria; p__Firmicutes; c__Clostridia; o__Lachnospirales; f__Lachnospiraceae; g__Lachnospiraceae_NK4A136_group
ASV715	0	4.69991e-05	0	k__Bacteria; p__Proteobacteria; c__Alphaproteobacteria; o__Elsterales; f__; g__; s__
ASV716	0	4.69991e-05	0	k__Bacteria
ASV717	0	8.22484e-05	0	k__Bacteria; p__Proteobacteria; c__Alphaproteobacteria; o__Sphingomonadales; f__Sphingomonadaceae; g__Sphingomonas
ASV718	0	5.87489e-05	0	k__Bacteria; p__Proteobacteria; c__Gammaproteobacteria; o__Xanthomonadales; f__Xanthomonadaceae; g__Arenimonas
ASV719	0	7.04987e-05	0	k__Bacteria; p__Actinobacteriota; c__Thermoleophilia; o__Gaiellales; f__Gaiellaceae; g__Gaiella; s__
ASV720	0	4.69991e-05	0	k__Bacteria
ASV721	0	5.87489e-05	0	Unassigned
ASV722	0	4.69991e-05	0	k__Bacteria; p__Nitrospirota; c__Nitrospiria; o__Nitrospirales; f__Nitrospiraceae; g__Nitrospira
ASV723	0	4.69991e-05	0	Unassigned
ASV724	0	4.69991e-05	0	k__Bacteria; p__Proteobacteria; c__Alphaproteobacteria; o__Reyranellales; f__Reyranellaceae; g__Reyranella
ASV725	0	4.69991e-05	0	k__Bacteria
ASV726	0	5.87489e-05	0	k__Bacteria; p__Acidobacteriota; c__Acidobacteriae; o__Acidobacteriales; f__; g__; s__
ASV727	0	9.39982e-05	0	k__Bacteria; p__Planctomycetota; c__Planctomycetes; o__Gemmatales; f__Gemmataceae; g__Fimbriiglobus; s__
ASV728	0	7.04987e-05	0	k__Bacteria
ASV729	0	4.69991e-05	0	k__Bacteria
ASV730	0	5.87489e-05	0	k__Bacteria
ASV731	0	4.69991e-05	0	k__Bacteria; p__Acidobacteriota; c__Acidobacteriae; o__Acidobacteriales; f__; g__; s__
ASV732	0	5.87489e-05	0	k__Bacteria; p__Proteobacteria; c__Gammaproteobacteria; o__Burkholderiales; f__Comamonadaceae; g__Variovorax
ASV733	0	4.69991e-05	0	k__Bacteria
ASV734	0	5.87489e-05	0	k__Bacteria; p__Actinobacteriota; c__Thermoleophilia; o__Solirubrobacterales; f__Solirubrobacteraceae; g__Solirubrobacter; s__
ASV735	0	4.69991e-05	0	k__Bacteria; p__Proteobacteria; c__Gammaproteobacteria; o__Burkholderiales; f__Nitrosomonadaceae; g__Ellin6067; s__
ASV736	0	5.87489e-05	0	k__Bacteria; p__Acidobacteriota; c__Vicinamibacteria; o__Vicinamibacterales; f__; g__; s__
ASV737	0	7.04987e-05	0	k__Bacteria
ASV738	0	5.87489e-05	0	Unassigned
ASV739	0	7.04987e-05	0	Unassigned
ASV740	0	4.69991e-05	0	Unassigned
ASV741	0	5.87489e-05	0	k__Bacteria; p__Actinobacteriota; c__Thermoleophilia; o__Gaiellales; f__; g__; s__
ASV742	0	4.69991e-05	0	k__Bacteria
ASV743	0	7.04987e-05	0	k__Bacteria
ASV744	0	5.87489e-05	0	Unassigned
ASV745	0	5.87489e-05	0	Unassigned
ASV746	0	5.87489e-05	0	k__Bacteria
ASV747	0	7.04987e-05	0	k__Bacteria; p__Actinobacteriota; c__Thermoleophilia; o__Solirubrobacterales; f__Solirubrobacteraceae; g__Solirubrobacter
ASV748	0	5.87489e-05	0	k__Bacteria; p__Proteobacteria; c__Gammaproteobacteria; o__Xanthomonadales; f__Rhodanobacteraceae; g__Dokdonella; s__
ASV749	0	5.87489e-05	0	Unassigned
ASV750	0	5.87489e-05	0	k__Bacteria; p__Proteobacteria; c__Alphaproteobacteria; o__Rhizobiales; f__Pleomorphomonadaceae; g__Chthonobacter
ASV751	0	4.69991e-05	0	k__Bacteria
ASV752	0	4.69991e-05	0	Unassigned
ASV753	0	7.04987e-05	0	k__Bacteria
ASV754	0	4.69991e-05	0	Unassigned
ASV755	0	8.22484e-05	0	k__Bacteria
ASV756	0	5.87489e-05	0	k__Bacteria
ASV757	0	4.69991e-05	0	Unassigned
ASV758	0	5.87489e-05	0	k__Bacteria; p__Actinobacteriota; c__Thermoleophilia; o__Gaiellales; f__Gaiellaceae; g__Gaiella; s__actinobacterium_WWH12
ASV759	0	4.69991e-05	0	Unassigned
ASV760	0	4.69991e-05	0	k__Bacteria
ASV761	0	4.69991e-05	0	Unassigned
ASV762	0	7.04987e-05	0	k__Bacteria; p__Proteobacteria; c__Gammaproteobacteria; o__Gammaproteobacteria_Incertae_Sedis; f__Unknown_Family; g__Acidibacter; s__
ASV763	0	7.04987e-05	0	k__Bacteria
ASV764	0	5.87489e-05	0	k__Bacteria
ASV765	0	0.000105748	0	k__Bacteria
ASV766	0	0.000117498	0	k__Bacteria; p__Acidobacteriota; c__Acidobacteriae; o__Subgroup_2; f__Subgroup_2; g__Subgroup_2; s__
ASV767	0	5.87489e-05	0	k__Bacteria; p__Myxococcota; c__Polyangia; o__Haliangiales; f__Haliangiaceae; g__Haliangium; s__
ASV768	0	5.87489e-05	0	k__Bacteria; p__Acidobacteriota; c__Acidobacteriae; o__Acidobacteriales; f__Acidobacteriaceae_(Subgroup_1); g__; s__Acidobacteria_bacterium
ASV769	0	5.87489e-05	0	k__Bacteria
ASV770	0	7.04987e-05	0	k__Bacteria; p__Actinobacteriota; c__Actinobacteria; o__Micrococcales; f__Bogoriellaceae; g__Georgenia; s__Georgenia_sp.
ASV771	0	5.87489e-05	0	Unassigned
ASV772	0	5.87489e-05	0	Unassigned
ASV773	0	5.87489e-05	0	k__Bacteria
ASV774	4.69991e-05	0	0	Unassigned
ASV775	0	7.04987e-05	0	k__Bacteria; p__Proteobacteria; c__Alphaproteobacteria; o__Azospirillales; f__Azospirillales_Incertae_Sedis; g__Stella
ASV776	7.04987e-05	0	0	k__Bacteria; p__Firmicutes; c__Clostridia; o__Lachnospirales; f__Lachnospiraceae; g__Lachnospira; s__
ASV777	0	0	4.69991e-05	Unassigned
ASV778	0	0	5.87489e-05	Unassigned
ASV779	0	0	4.69991e-05	k__Bacteria; p__Proteobacteria; c__Gammaproteobacteria; o__Pseudomonadales; f__Pseudomonadaceae; g__Pseudomonas
ASV780	0	0	3.52493e-05	k__Bacteria
ASV781	0	0	4.69991e-05	k__Bacteria
ASV782	0	0	3.52493e-05	k__Bacteria; p__Firmicutes; c__Clostridia; o__Oscillospirales; f__Oscillospiraceae; g__UCG-003; s__
ASV783	0	0	4.69991e-05	Unassigned
ASV784	0	0	4.69991e-05	k__Bacteria
ASV785	3.52493e-05	0	0	k__Bacteria; p__Proteobacteria; c__Gammaproteobacteria; o__Xanthomonadales; f__Rhodanobacteraceae; g__Aquimonas; s__
ASV786	3.52493e-05	0	0	Unassigned
ASV787	3.52493e-05	0	0	Unassigned
ASV788	3.52493e-05	0	0	k__Bacteria; p__Firmicutes; c__Clostridia; o__Monoglobales; f__Monoglobaceae; g__Monoglobus; s__
ASV789	3.52493e-05	0	0	k__Bacteria; p__Firmicutes; c__Bacilli; o__Lactobacillales; f__Leuconostocaceae; g__Leuconostoc
ASV790	3.52493e-05	0	0	Unassigned
ASV791	3.52493e-05	0	0	k__Bacteria; p__Nitrospirota; c__Nitrospiria; o__Nitrospirales; f__Nitrospiraceae; g__Nitrospira; s__Nitrospira_defluvii
ASV792	3.52493e-05	0	0	k__Bacteria; p__Proteobacteria; c__Gammaproteobacteria; o__Legionellales; f__Legionellaceae; g__Legionella; s__
ASV793	3.52493e-05	0	0	k__Bacteria
ASV794	4.69991e-05	0	0	k__Bacteria
ASV795	4.69991e-05	0	0	k__Bacteria; p__Firmicutes; c__Bacilli; o__Erysipelotrichales; f__Erysipelotrichaceae; g__ZOR0006
ASV796	3.52493e-05	0	0	k__Bacteria; p__Firmicutes; c__Bacilli; o__Erysipelotrichales; f__Erysipelotrichaceae; g__Dubosiella; s__
ASV797	4.69991e-05	0	0	k__Bacteria; p__Firmicutes; c__Clostridia; o__Oscillospirales; f__Ruminococcaceae; g__Subdoligranulum; s__
ASV798	0	0	4.69991e-05	k__Bacteria; p__Proteobacteria; c__Alphaproteobacteria; o__Rhizobiales; f__Rhizobiales_Incertae_Sedis; g__; s__
ASV799	0	0	4.69991e-05	Unassigned
ASV800	0	0	3.52493e-05	Unassigned
ASV801	0	0	4.69991e-05	k__Bacteria; p__Bacteroidota; c__Bacteroidia; o__Bacteroidales; f__Muribaculaceae; g__Muribaculaceae; s__
ASV802	0	0	3.52493e-05	k__Bacteria; p__Proteobacteria; c__Alphaproteobacteria; o__Elsterales; f__Elsteraceae; g__Elstera
ASV803	0	0	3.52493e-05	Unassigned
ASV804	0	0	4.69991e-05	Unassigned
ASV805	0	0	7.04987e-05	k__Bacteria; p__Desulfobacterota; c__Desulfovibrionia; o__Desulfovibrionales; f__Desulfovibrionaceae; g__; s__
ASV806	1.17498e-05	0	2.34996e-05	k__Bacteria; p__Proteobacteria; c__Alphaproteobacteria; o__Caulobacterales; f__Hyphomonadaceae; g__SWB02; s__
ASV807	0	1.17498e-05	2.34996e-05	k__Bacteria; p__Acidobacteriota; c__Acidobacteriae; o__Acidobacteriales
ASV808	0	0	3.52493e-05	Unassigned
ASV809	0	0	4.69991e-05	k__Bacteria; p__Bacteroidota; c__Bacteroidia; o__Bacteroidales; f__Barnesiellaceae; g__Barnesiella; s__
ASV810	0	0	4.69991e-05	Unassigned
ASV811	0	0	4.69991e-05	k__Bacteria
ASV812	0	0	4.69991e-05	Unassigned
ASV813	0	0	5.87489e-05	Unassigned
ASV814	2.34996e-05	0	2.34996e-05	k__Bacteria; p__Verrucomicrobiota; c__Verrucomicrobiae; o__Verrucomicrobiales; f__Rubritaleaceae; g__Rubritaleaceae; s__
ASV815	0	0	4.69991e-05	k__Bacteria; p__Firmicutes; c__Clostridia; o__Clostridia_UCG-014; f__Clostridia_UCG-014; g__Clostridia_UCG-014; s__
ASV816	0	0	5.87489e-05	Unassigned
ASV817	0	0	3.52493e-05	k__Bacteria; p__Proteobacteria; c__Gammaproteobacteria; o__Legionellales; f__Legionellaceae; g__Legionella; s__
ASV818	0	0	3.52493e-05	Unassigned
ASV819	0	0	3.52493e-05	k__Bacteria; p__Proteobacteria; c__Alphaproteobacteria; o__Sphingomonadales; f__Sphingomonadaceae; g__Novosphingobium
ASV820	0	0	3.52493e-05	Unassigned
ASV821	0	0	3.52493e-05	Unassigned
ASV822	3.52493e-05	0	0	k__Bacteria
ASV823	3.52493e-05	0	0	k__Bacteria; p__Proteobacteria; c__Alphaproteobacteria; o__Sphingomonadales; f__Sphingomonadaceae; g__Sphingomonas
ASV824	0	4.69991e-05	0	k__Bacteria; p__Myxococcota; c__Polyangia; o__Polyangiales; f__BIrii41; g__BIrii41; s__
ASV825	3.52493e-05	0	0	Unassigned
ASV826	0	8.22484e-05	0	k__Bacteria; p__Actinobacteriota; c__Acidimicrobiia; o__Microtrichales; f__Ilumatobacteraceae
ASV827	0	4.69991e-05	0	k__Bacteria
ASV828	0	4.69991e-05	0	Unassigned
ASV829	0	4.69991e-05	0	k__Bacteria; p__Bacteroidota; c__Bacteroidia; o__Bacteroidales; f__Bacteroidaceae; g__Bacteroides; s__Bacteroides_coprocola
ASV830	0	4.69991e-05	0	k__Bacteria; p__Bacteroidota; c__Ignavibacteria; o__Ignavibacteriales; f__Ignavibacteriaceae; g__Ignavibacterium; s__
ASV831	0	5.87489e-05	0	k__Bacteria; p__Actinobacteriota; c__Thermoleophilia; o__Gaiellales; f__; g__; s__
ASV832	0	5.87489e-05	0	k__Bacteria; p__Bacteroidota; c__Bacteroidia; o__Bacteroidales; f__Muribaculaceae; g__Muribaculaceae; s__
ASV833	0	0.000105748	0	k__Bacteria; p__Gemmatimonadota; c__Gemmatimonadetes; o__Gemmatimonadales; f__Gemmatimonadaceae; g__Roseisolibacter; s__Roseisolibacter_agri
ASV834	0	8.22484e-05	0	k__Bacteria; p__Myxococcota; c__Myxococcia; o__Myxococcales; f__Myxococcaceae
ASV835	0	4.69991e-05	0	k__Bacteria; p__NB1-j; c__NB1-j; o__NB1-j; f__NB1-j; g__NB1-j; s__
ASV836	0	5.87489e-05	0	k__Bacteria; p__Patescibacteria; c__Saccharimonadia; o__Saccharimonadales; f__Saccharimonadales; g__Saccharimonadales; s__
ASV837	0	4.69991e-05	0	Unassigned
ASV838	0	4.69991e-05	0	Unassigned
ASV839	0	5.87489e-05	0	k__Bacteria; p__Chloroflexi; c__Anaerolineae; o__SBR1031; f__A4b; g__A4b; s__
ASV840	0	7.04987e-05	0	k__Bacteria; p__Proteobacteria; c__Gammaproteobacteria; o__Legionellales; f__Legionellaceae; g__Legionella
ASV841	0	4.69991e-05	0	k__Bacteria; p__Acidobacteriota; c__Holophagae; o__Subgroup_7; f__Subgroup_7; g__Subgroup_7; s__
ASV842	0	7.04987e-05	0	k__Bacteria; p__Bacteroidota; c__Bacteroidia; o__Bacteroidales; f__Muribaculaceae; g__Muribaculaceae; s__
ASV843	0	4.69991e-05	0	k__Bacteria; p__Entotheonellaeota; c__Entotheonellia; o__Entotheonellales; f__Entotheonellaceae; g__Entotheonellaceae; s__
ASV844	0	8.22484e-05	0	k__Bacteria; p__Acidobacteriota; c__Acidobacteriae; o__Subgroup_2; f__Subgroup_2; g__Subgroup_2; s__
ASV845	0	5.87489e-05	0	k__Bacteria; p__Actinobacteriota; c__Actinobacteria; o__Corynebacteriales; f__Corynebacteriaceae; g__Corynebacterium; s__Corynebacterium_amycolatum
ASV846	0	5.87489e-05	0	k__Bacteria; p__Firmicutes; c__Clostridia; o__Oscillospirales; f__Ruminococcaceae; g__Ruminococcus; s__bacterium_YRD2003
ASV847	0	5.87489e-05	0	k__Bacteria; p__Acidobacteriota; c__Subgroup_22; o__Subgroup_22; f__Subgroup_22; g__Subgroup_22; s__
ASV848	0	5.87489e-05	0	k__Bacteria; p__Bacteroidota; c__Bacteroidia; o__Bacteroidales; f__Dysgonomonadaceae; g__Dysgonomonas
ASV849	0	4.69991e-05	0	Unassigned
ASV850	3.52493e-05	0	0	Unassigned
ASV851	4.69991e-05	0	0	k__Bacteria
ASV852	4.69991e-05	0	0	k__Bacteria
ASV853	3.52493e-05	0	0	Unassigned
ASV854	3.52493e-05	0	0	k__Bacteria
ASV855	3.52493e-05	0	0	Unassigned
ASV856	3.52493e-05	0	0	k__Bacteria; p__Proteobacteria; c__Gammaproteobacteria; o__Burkholderiales; f__Sutterellaceae; g__Sutterella; s__
ASV857	3.52493e-05	0	0	k__Bacteria; p__Firmicutes; c__Clostridia; o__Lachnospirales; f__Lachnospiraceae; g__GCA-900066575; s__
ASV858	3.52493e-05	0	0	k__Bacteria
ASV859	4.69991e-05	0	0	k__Bacteria; p__Firmicutes; c__Clostridia; o__Lachnospirales; f__Lachnospiraceae; g__Eubacterium_ventriosum_group; s__
ASV860	4.69991e-05	0	0	k__Bacteria; p__Firmicutes; c__Clostridia; o__Lachnospirales; f__Lachnospiraceae; g__Anaerosporobacter; s__
ASV861	0	5.87489e-05	0	k__Bacteria; p__Actinobacteriota; c__MB-A2-108; o__MB-A2-108; f__MB-A2-108; g__MB-A2-108; s__
ASV862	4.69991e-05	0	0	k__Bacteria
ASV863	3.52493e-05	0	0	k__Bacteria; p__Proteobacteria; c__Gammaproteobacteria; o__Xanthomonadales; f__Xanthomonadaceae; g__Pseudoxanthomonas; s__Pseudoxanthomonas_mexicana
ASV864	4.69991e-05	0	0	k__Bacteria; p__Proteobacteria; c__Alphaproteobacteria; o__Rhizobiales
ASV865	0	7.04987e-05	0	k__Bacteria; p__Acidobacteriota; c__Blastocatellia; o__Blastocatellales; f__Blastocatellaceae; g__Aridibacter; s__
ASV866	0	7.04987e-05	0	k__Bacteria; p__Proteobacteria; c__Gammaproteobacteria; o__Xanthomonadales; f__Xanthomonadaceae; g__Lysobacter
ASV867	0	7.04987e-05	0	k__Bacteria; p__Proteobacteria; c__Gammaproteobacteria; o__Pseudomonadales; f__Moraxellaceae; g__Enhydrobacter
ASV868	0	4.69991e-05	0	k__Bacteria; p__Myxococcota; c__Polyangia; o__Haliangiales; f__Haliangiaceae; g__Haliangium; s__
ASV869	0	5.87489e-05	0	k__Bacteria; p__Acidobacteriota; c__Acidobacteriae; o__Acidobacteriales; f__Acidobacteriaceae_(Subgroup_1)
ASV870	0	5.87489e-05	0	k__Bacteria; p__WPS-2; c__WPS-2; o__WPS-2; f__WPS-2; g__WPS-2; s__
ASV871	0	5.87489e-05	0	Unassigned
